# Supplementary material for: An evaluation of atmospheric absorption models at millimetre and sub-millimetre wavelengths using airborne observations
Source: Copernicus journal article supplement (doi:10.5194/egusphere-2024-229), 2024-01-29

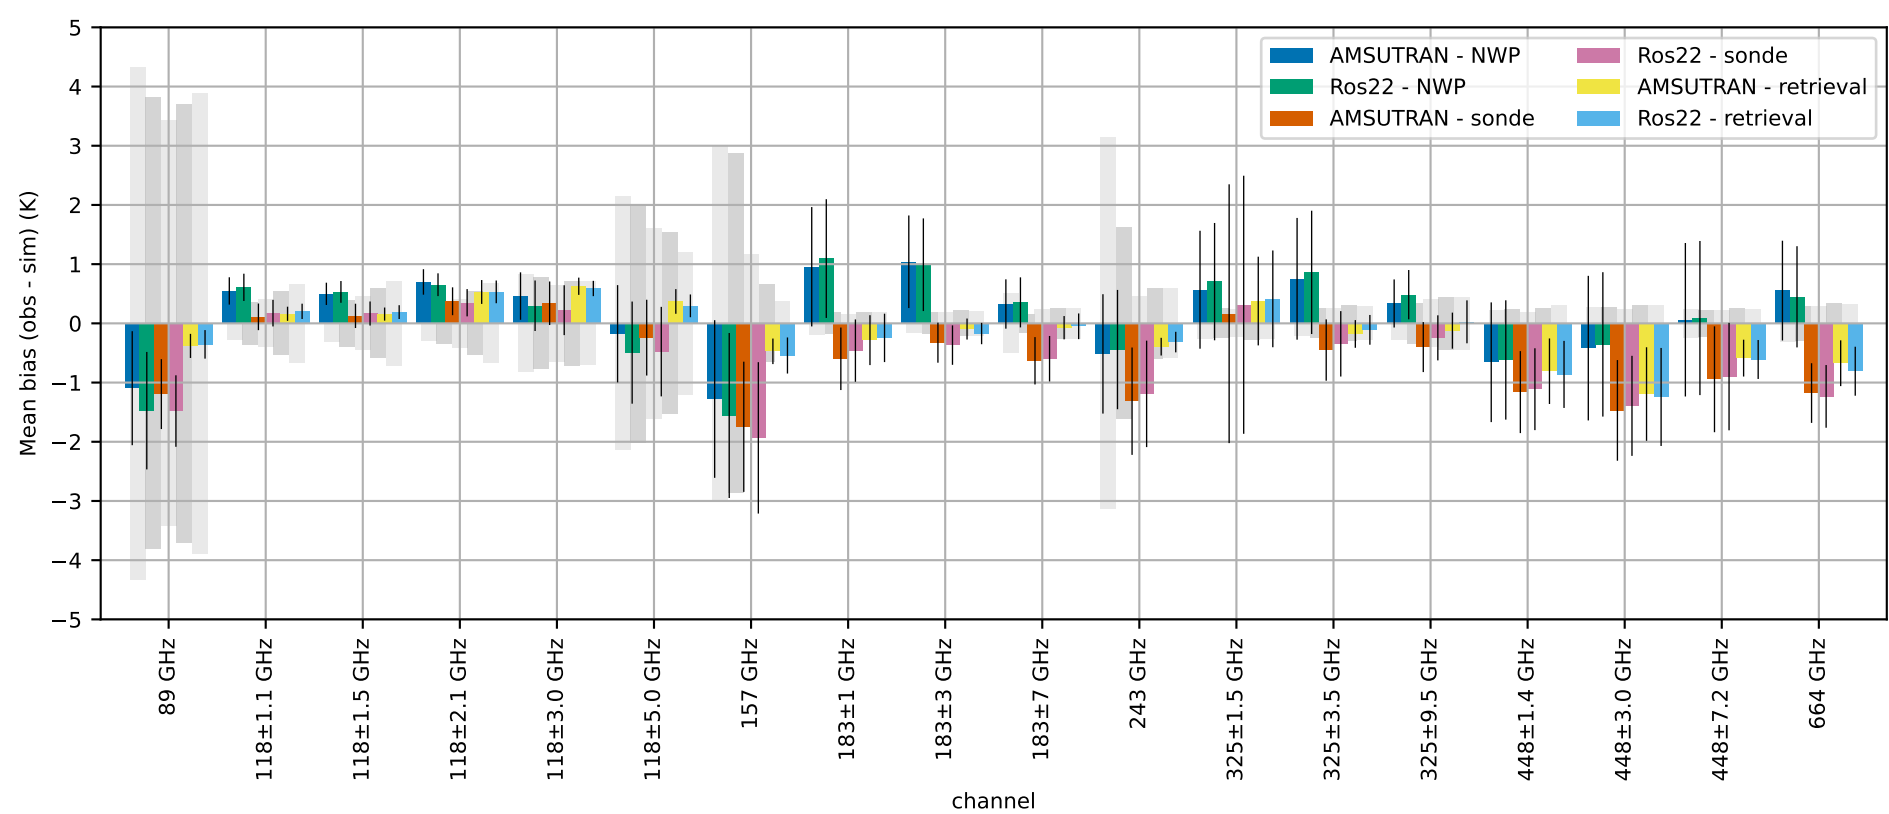

Supplement: Supplementary file [file egusphere-2024-229-AC2-supplement.pdf]
