# Supplementary figures and images for: An evaluation of atmospheric absorption models at millimetre and sub-millimetre wavelengths using airborne observations
Source: Copernicus journal article supplement (doi:10.5194/egusphere-2024-229), 2024-01-29

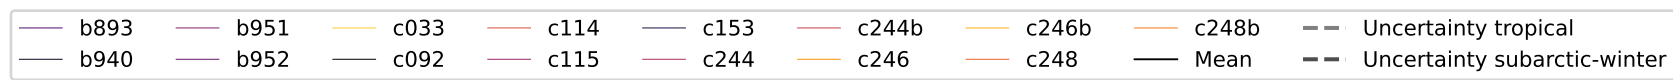

89 GHz

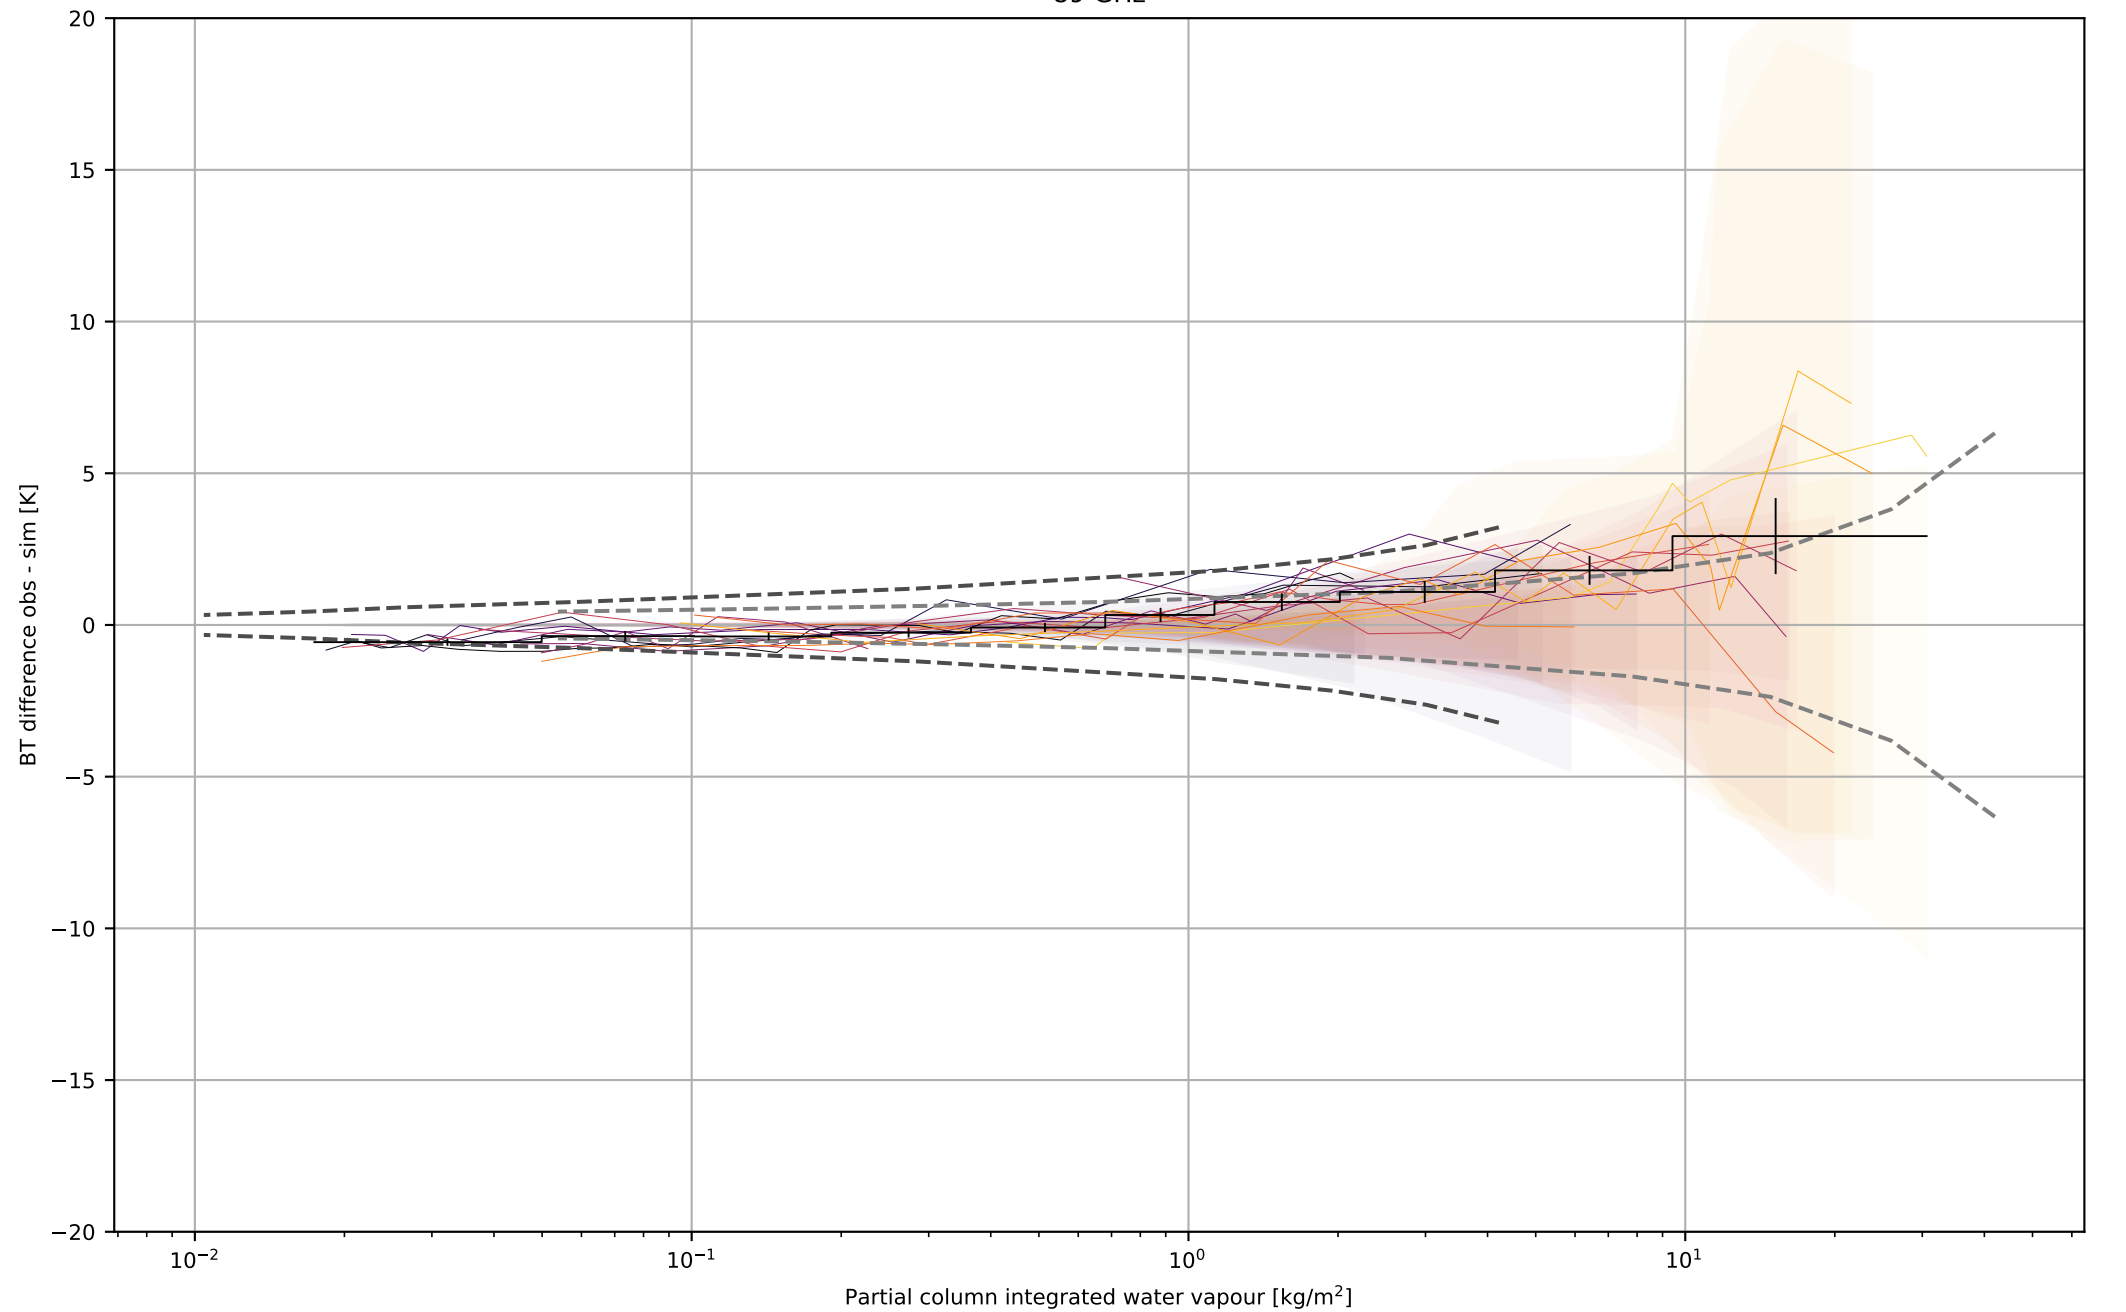

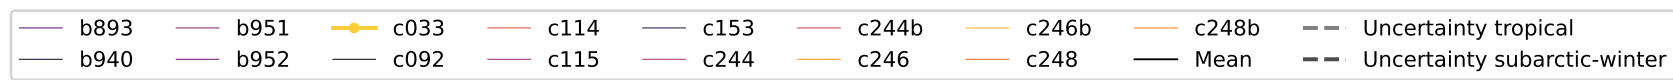

118±1.1 GHz

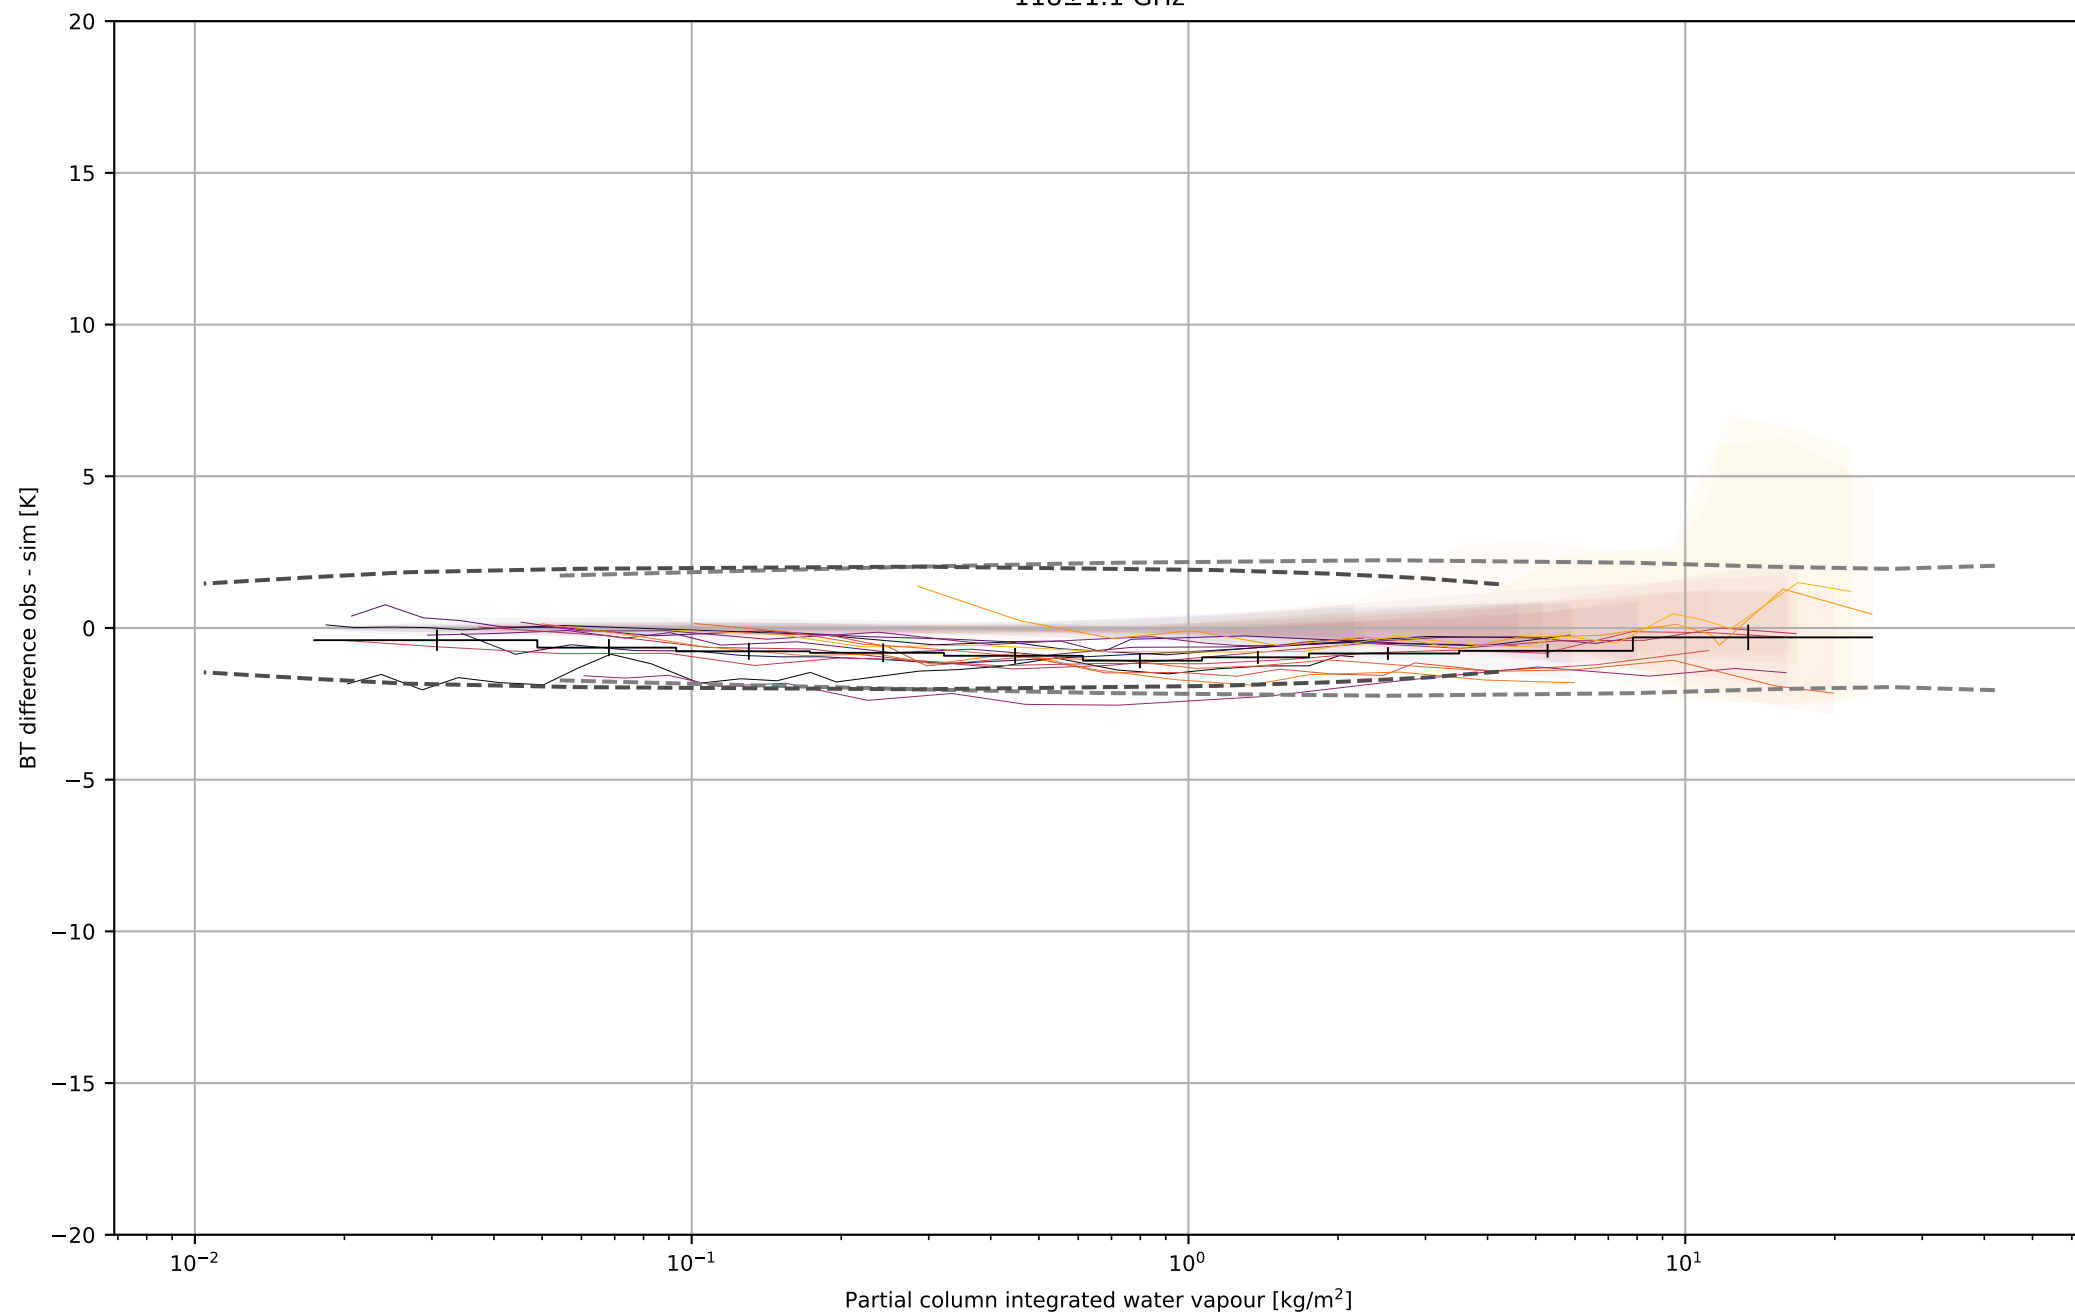

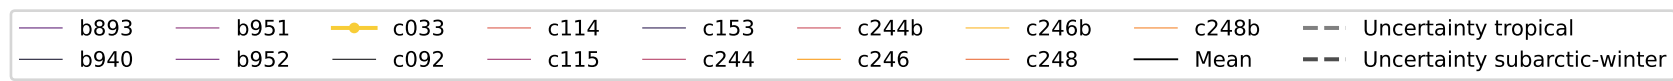

118±1.5 GHz

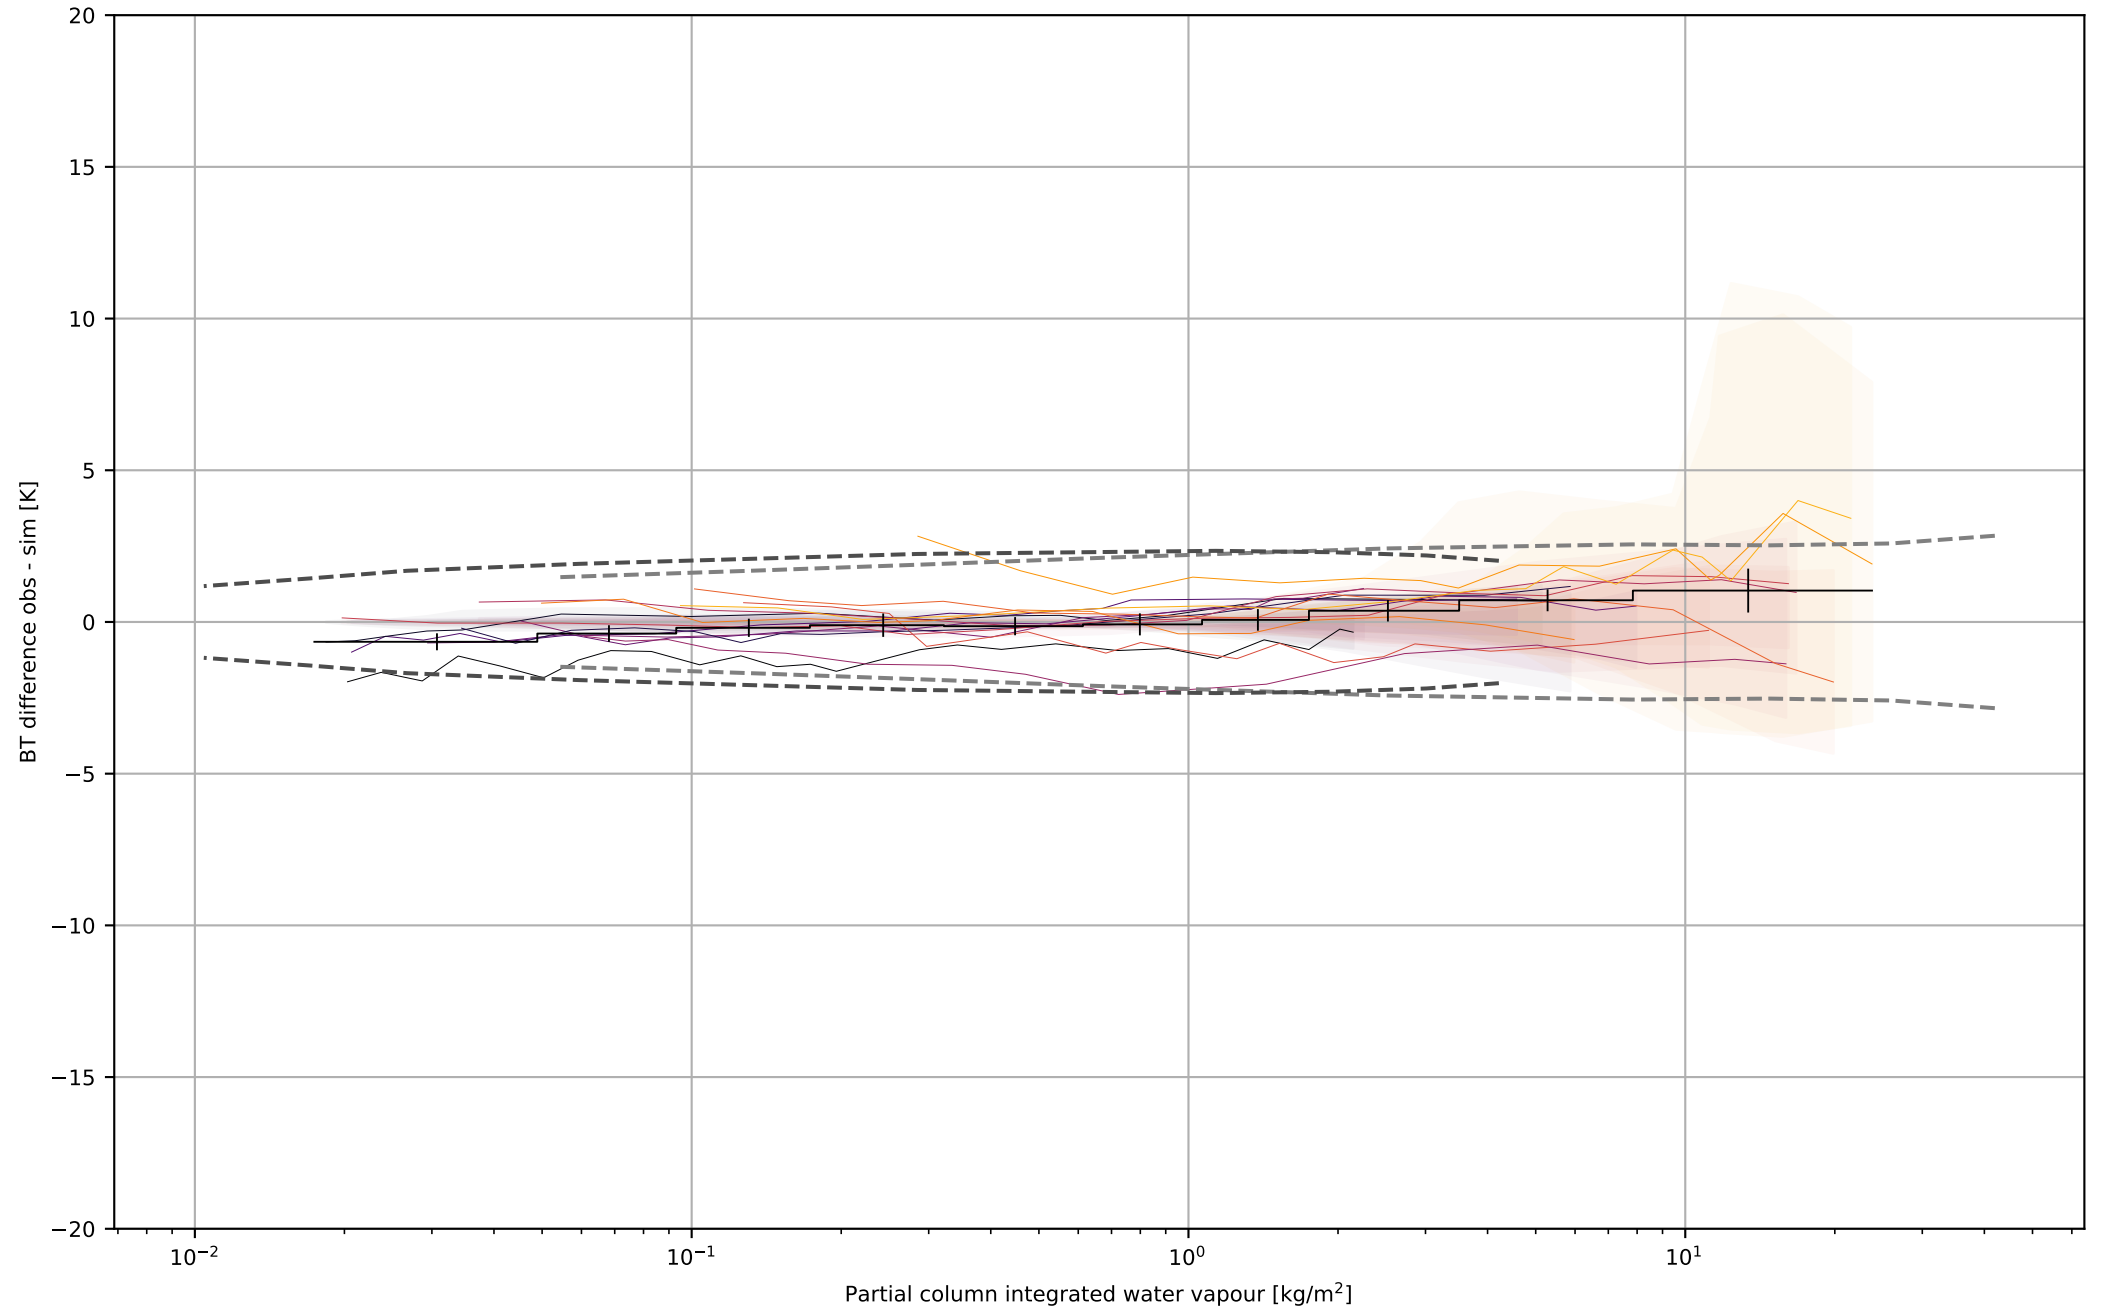



118±2.1 GHz

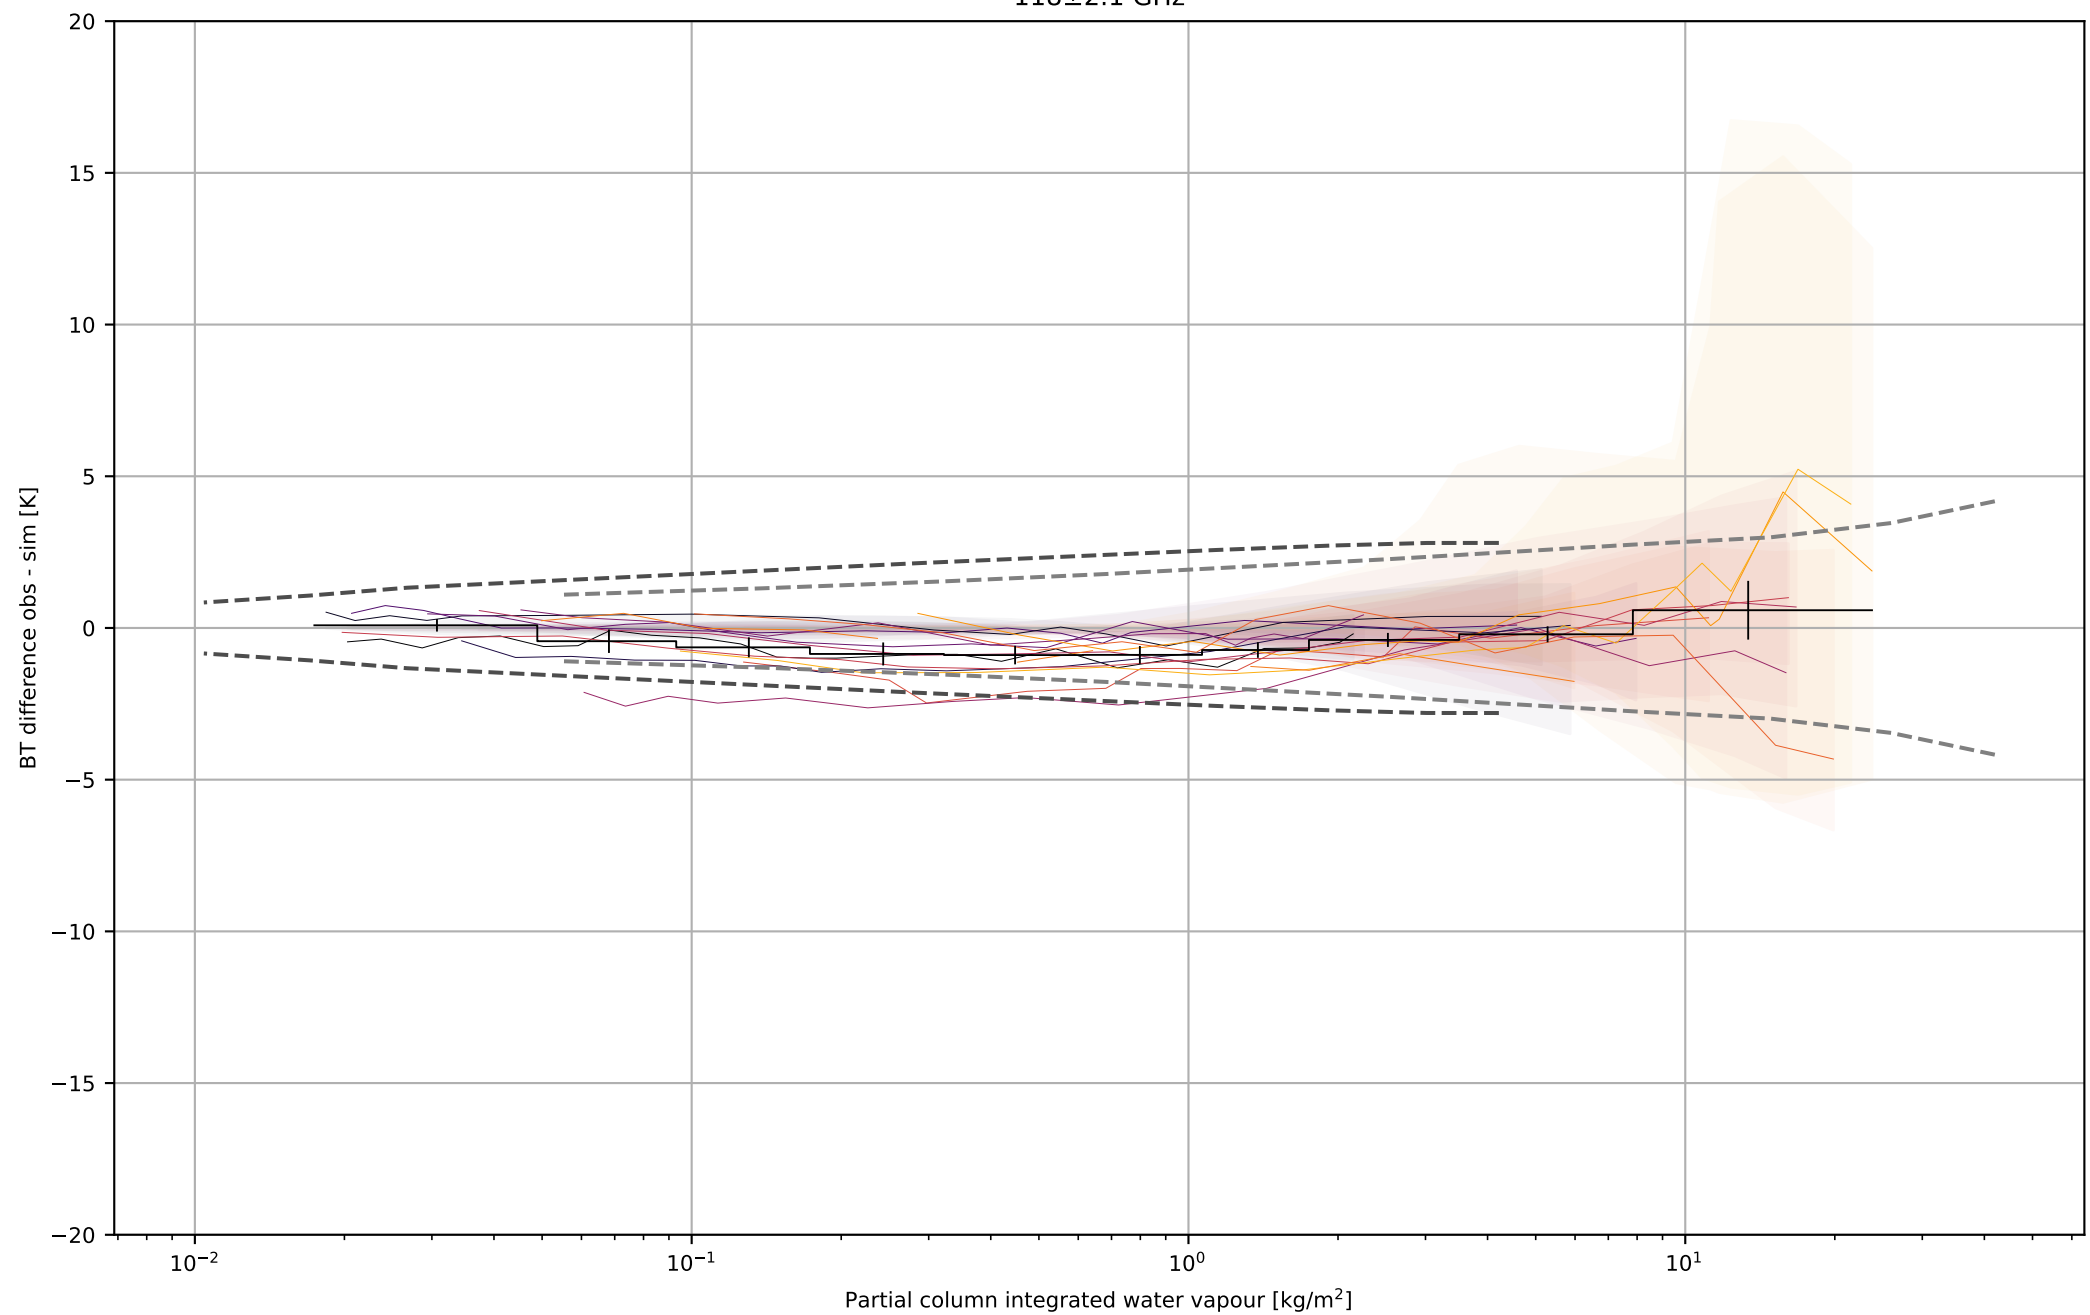



118±3.0 GHz

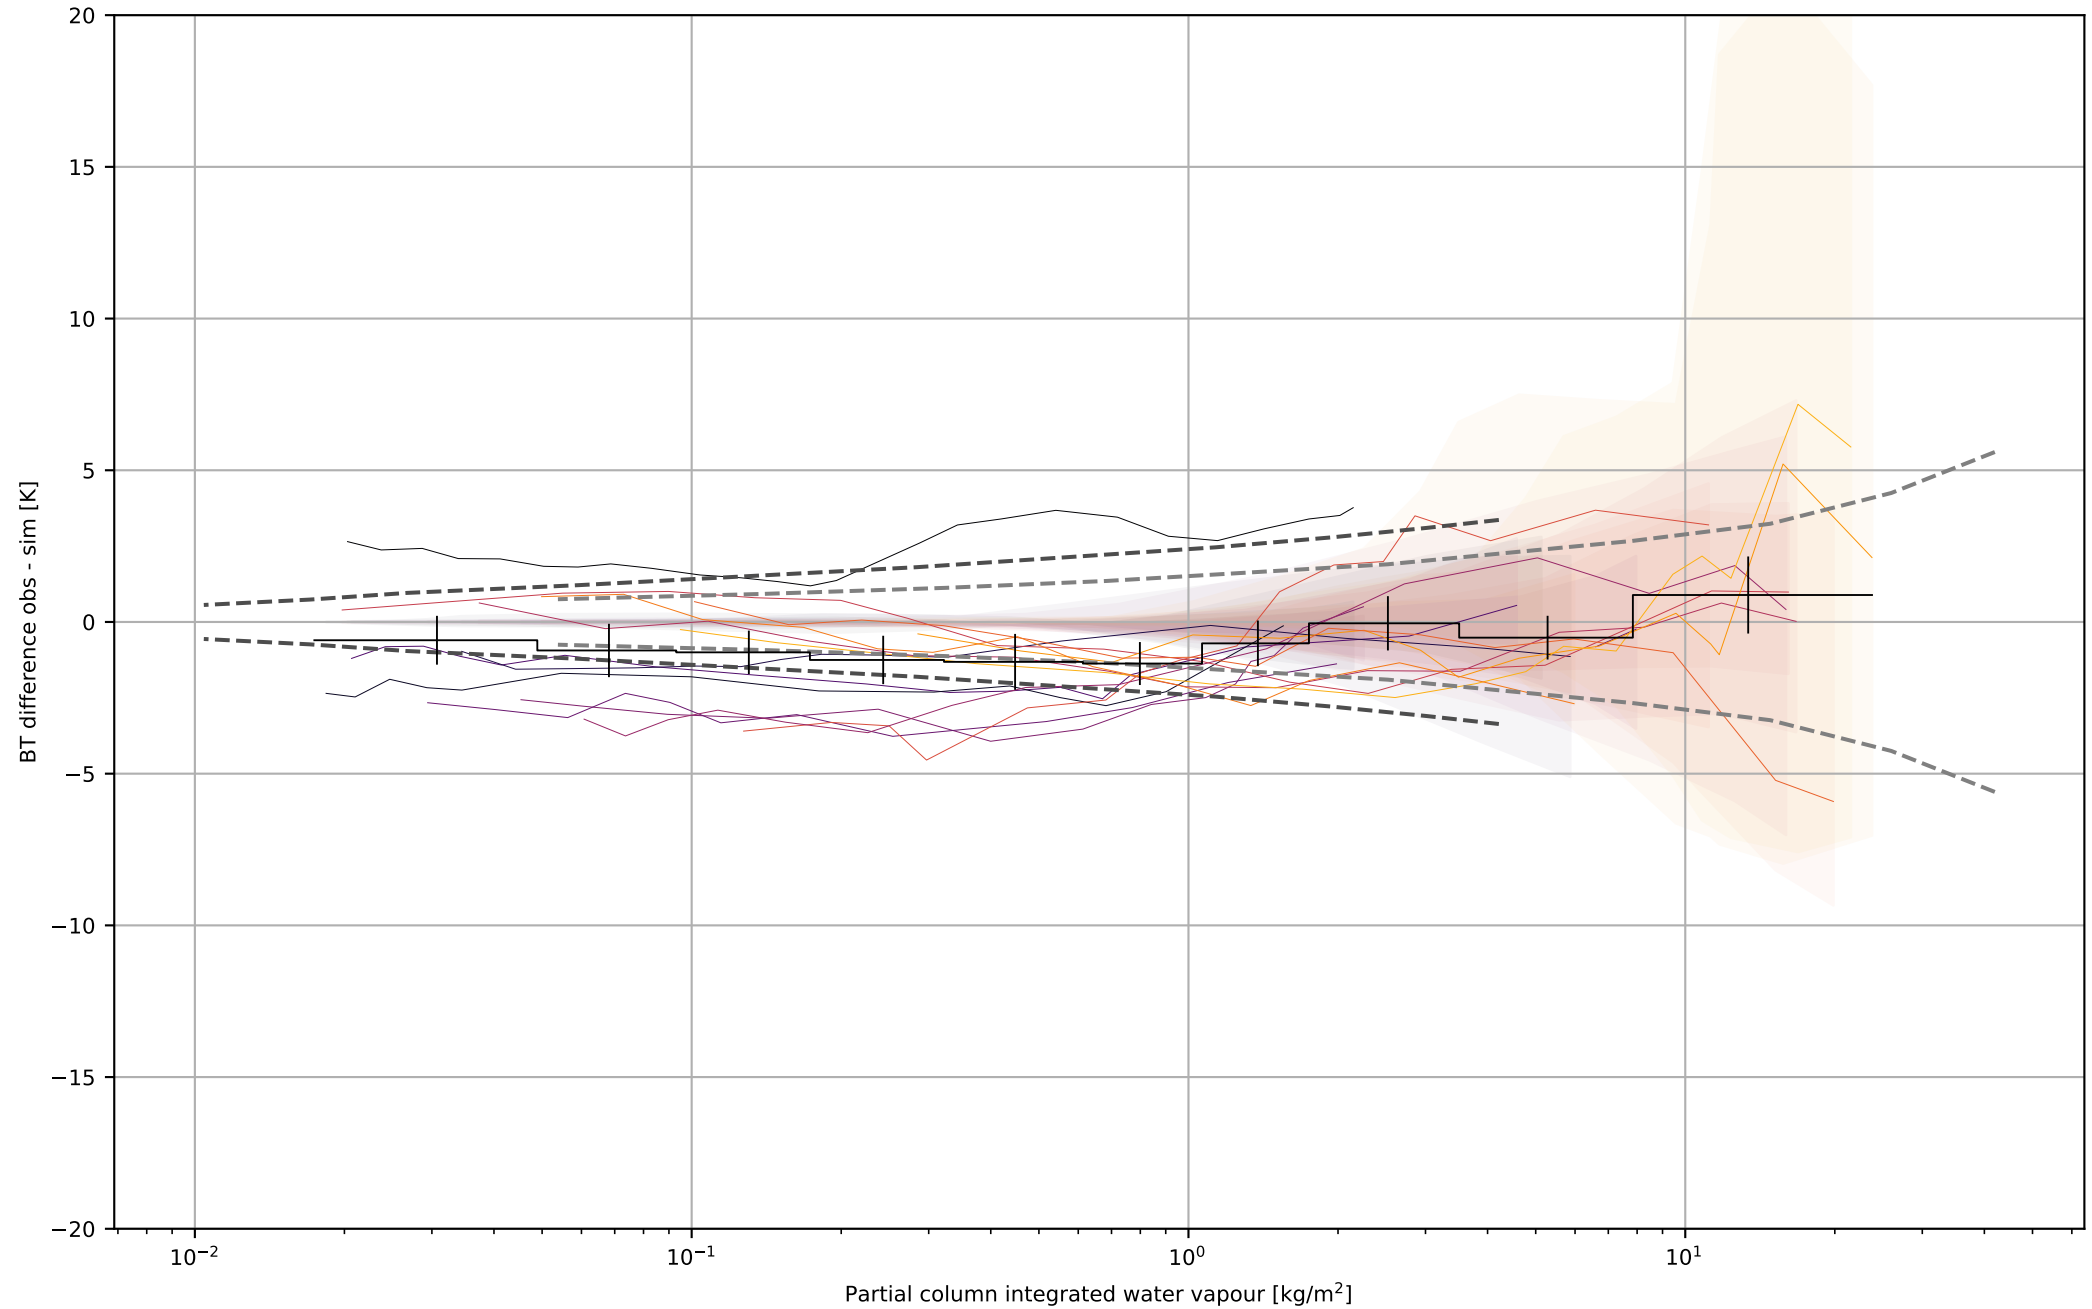



118±5.0 GHz

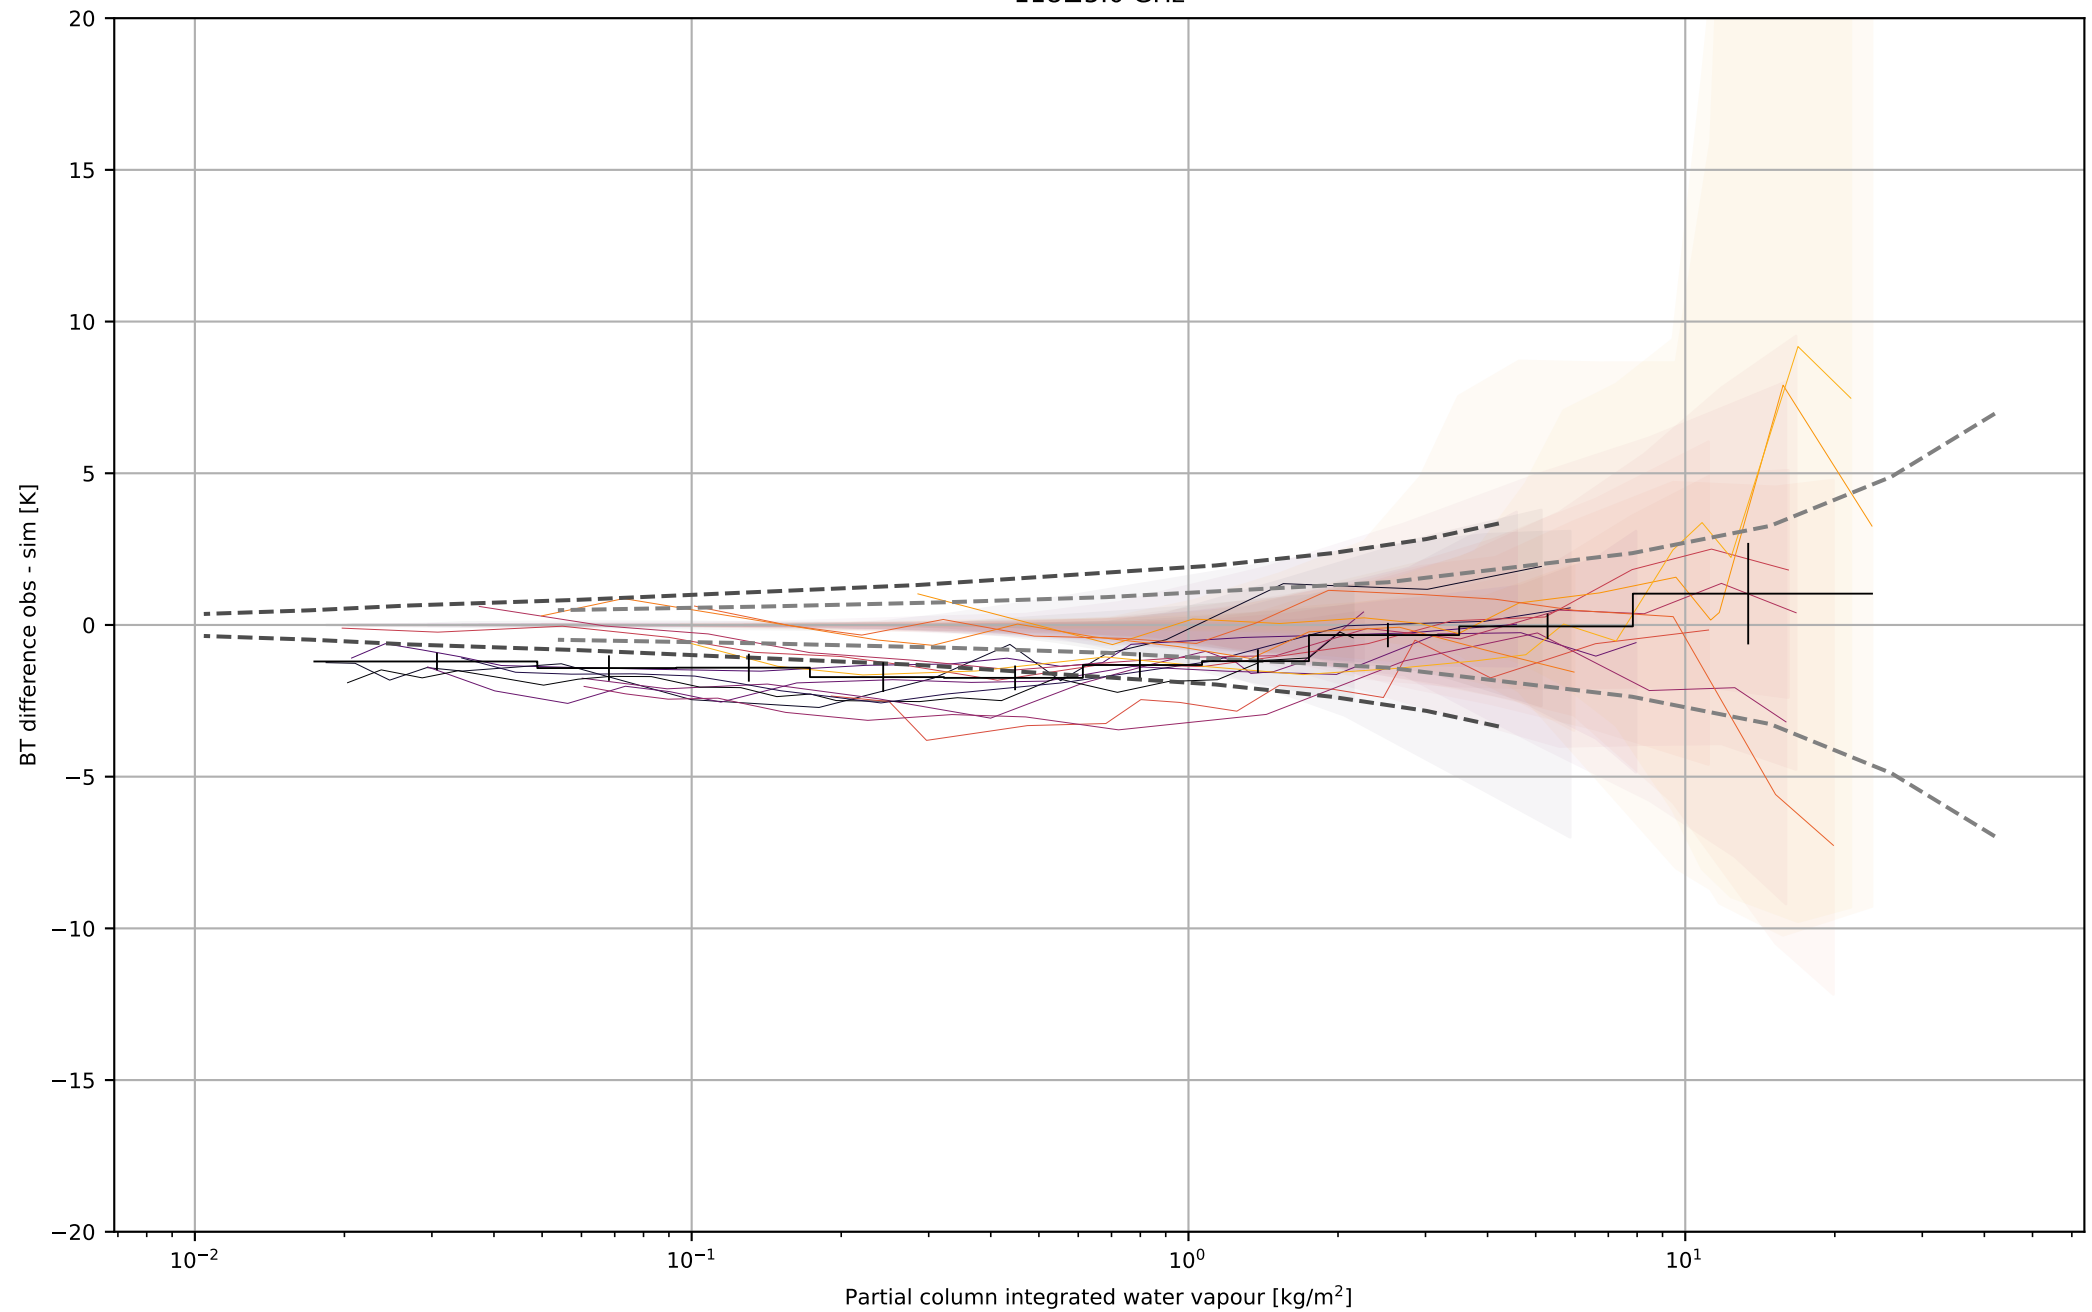

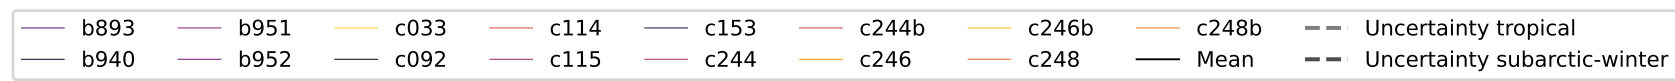

157 GHz

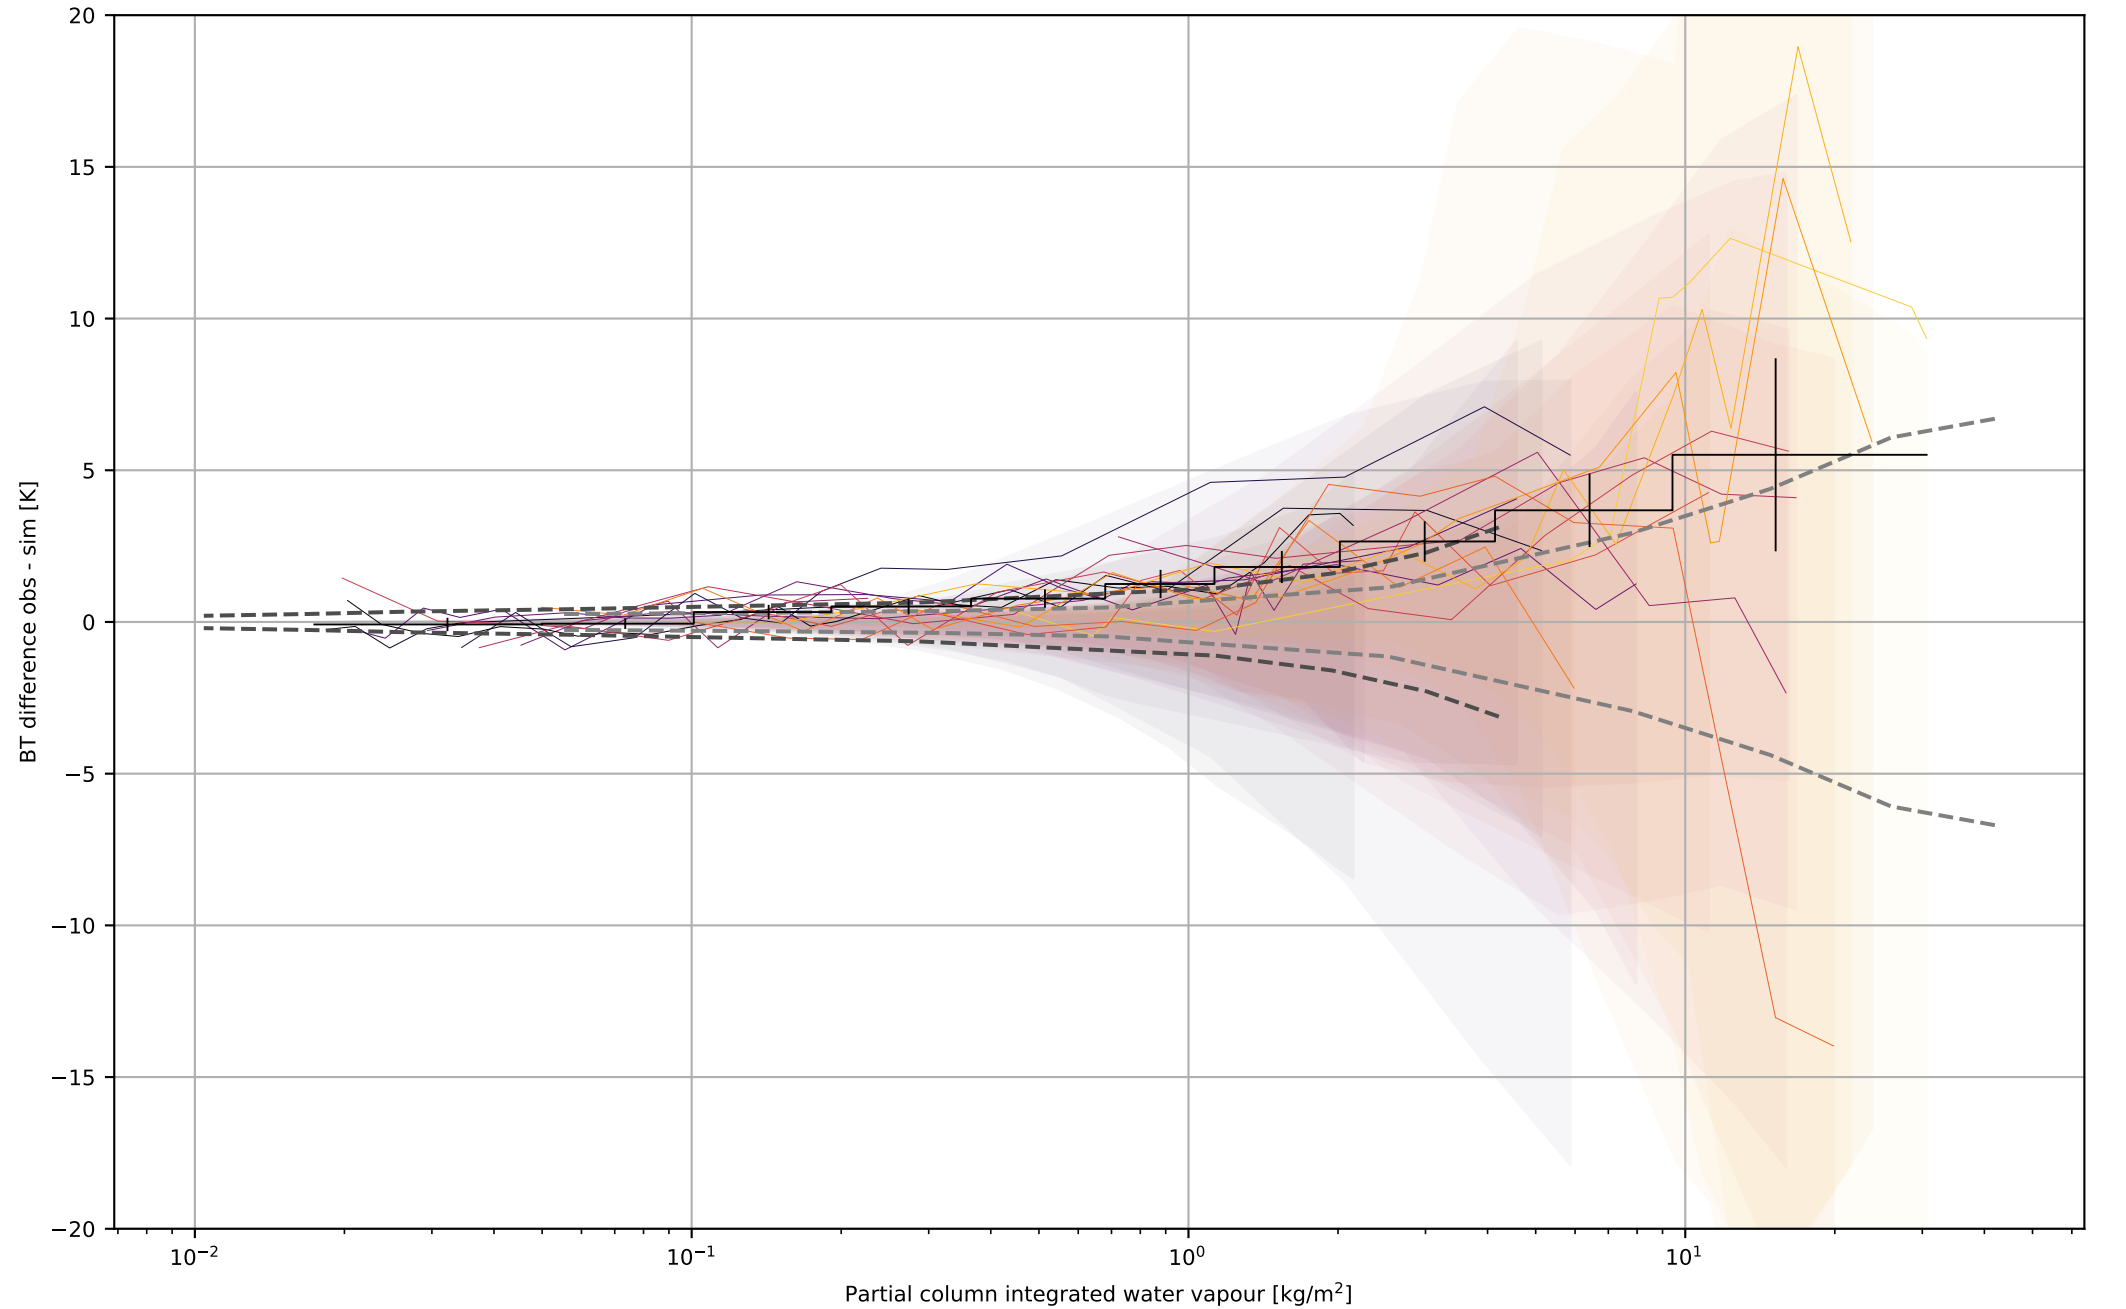



183±1 GHz

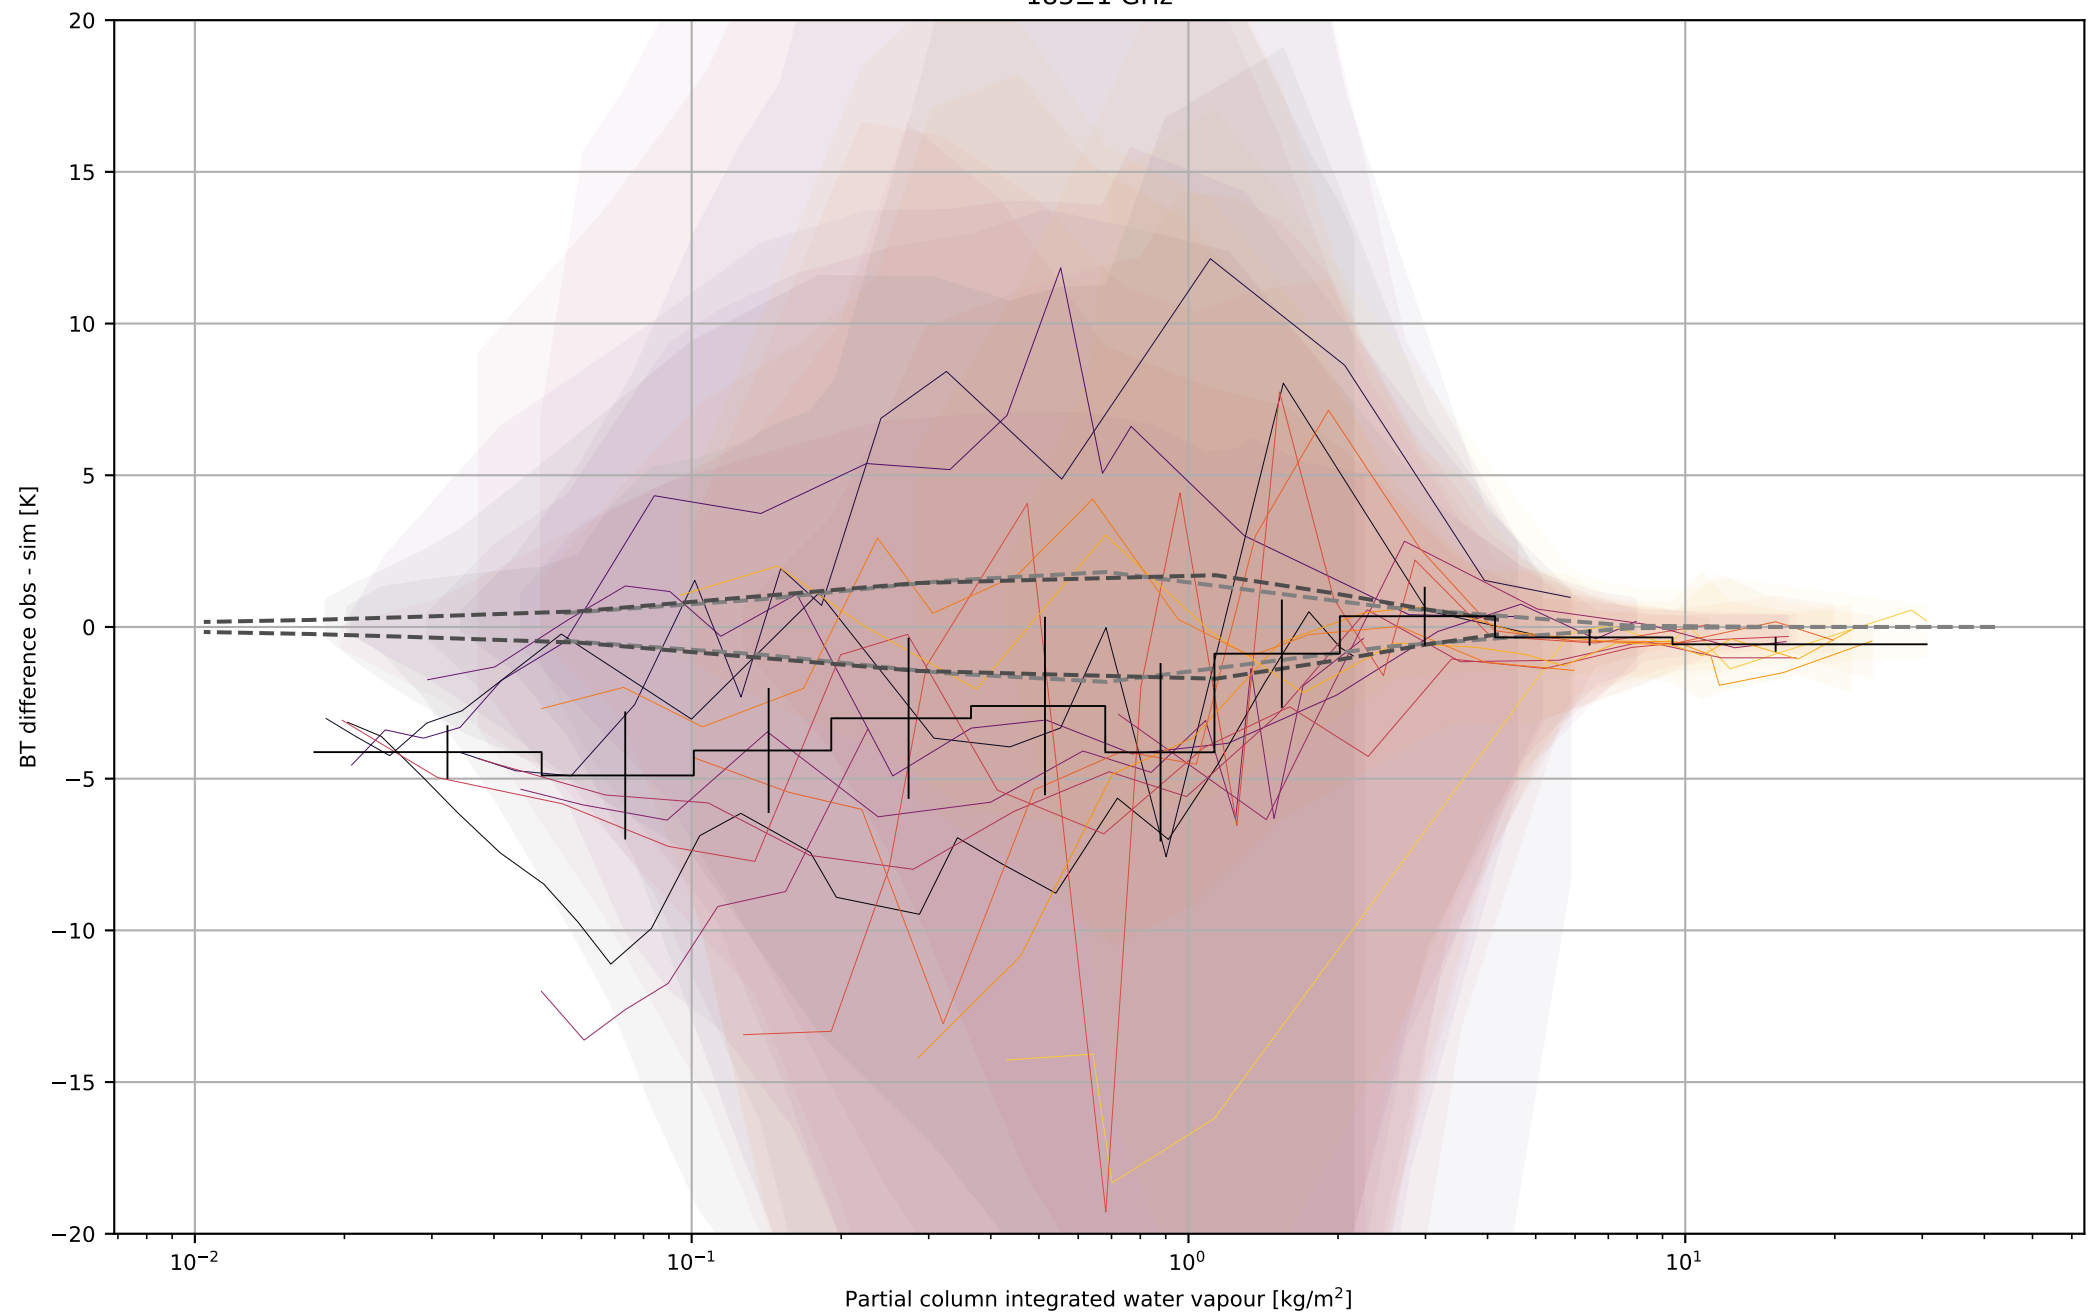





183±3 GHz

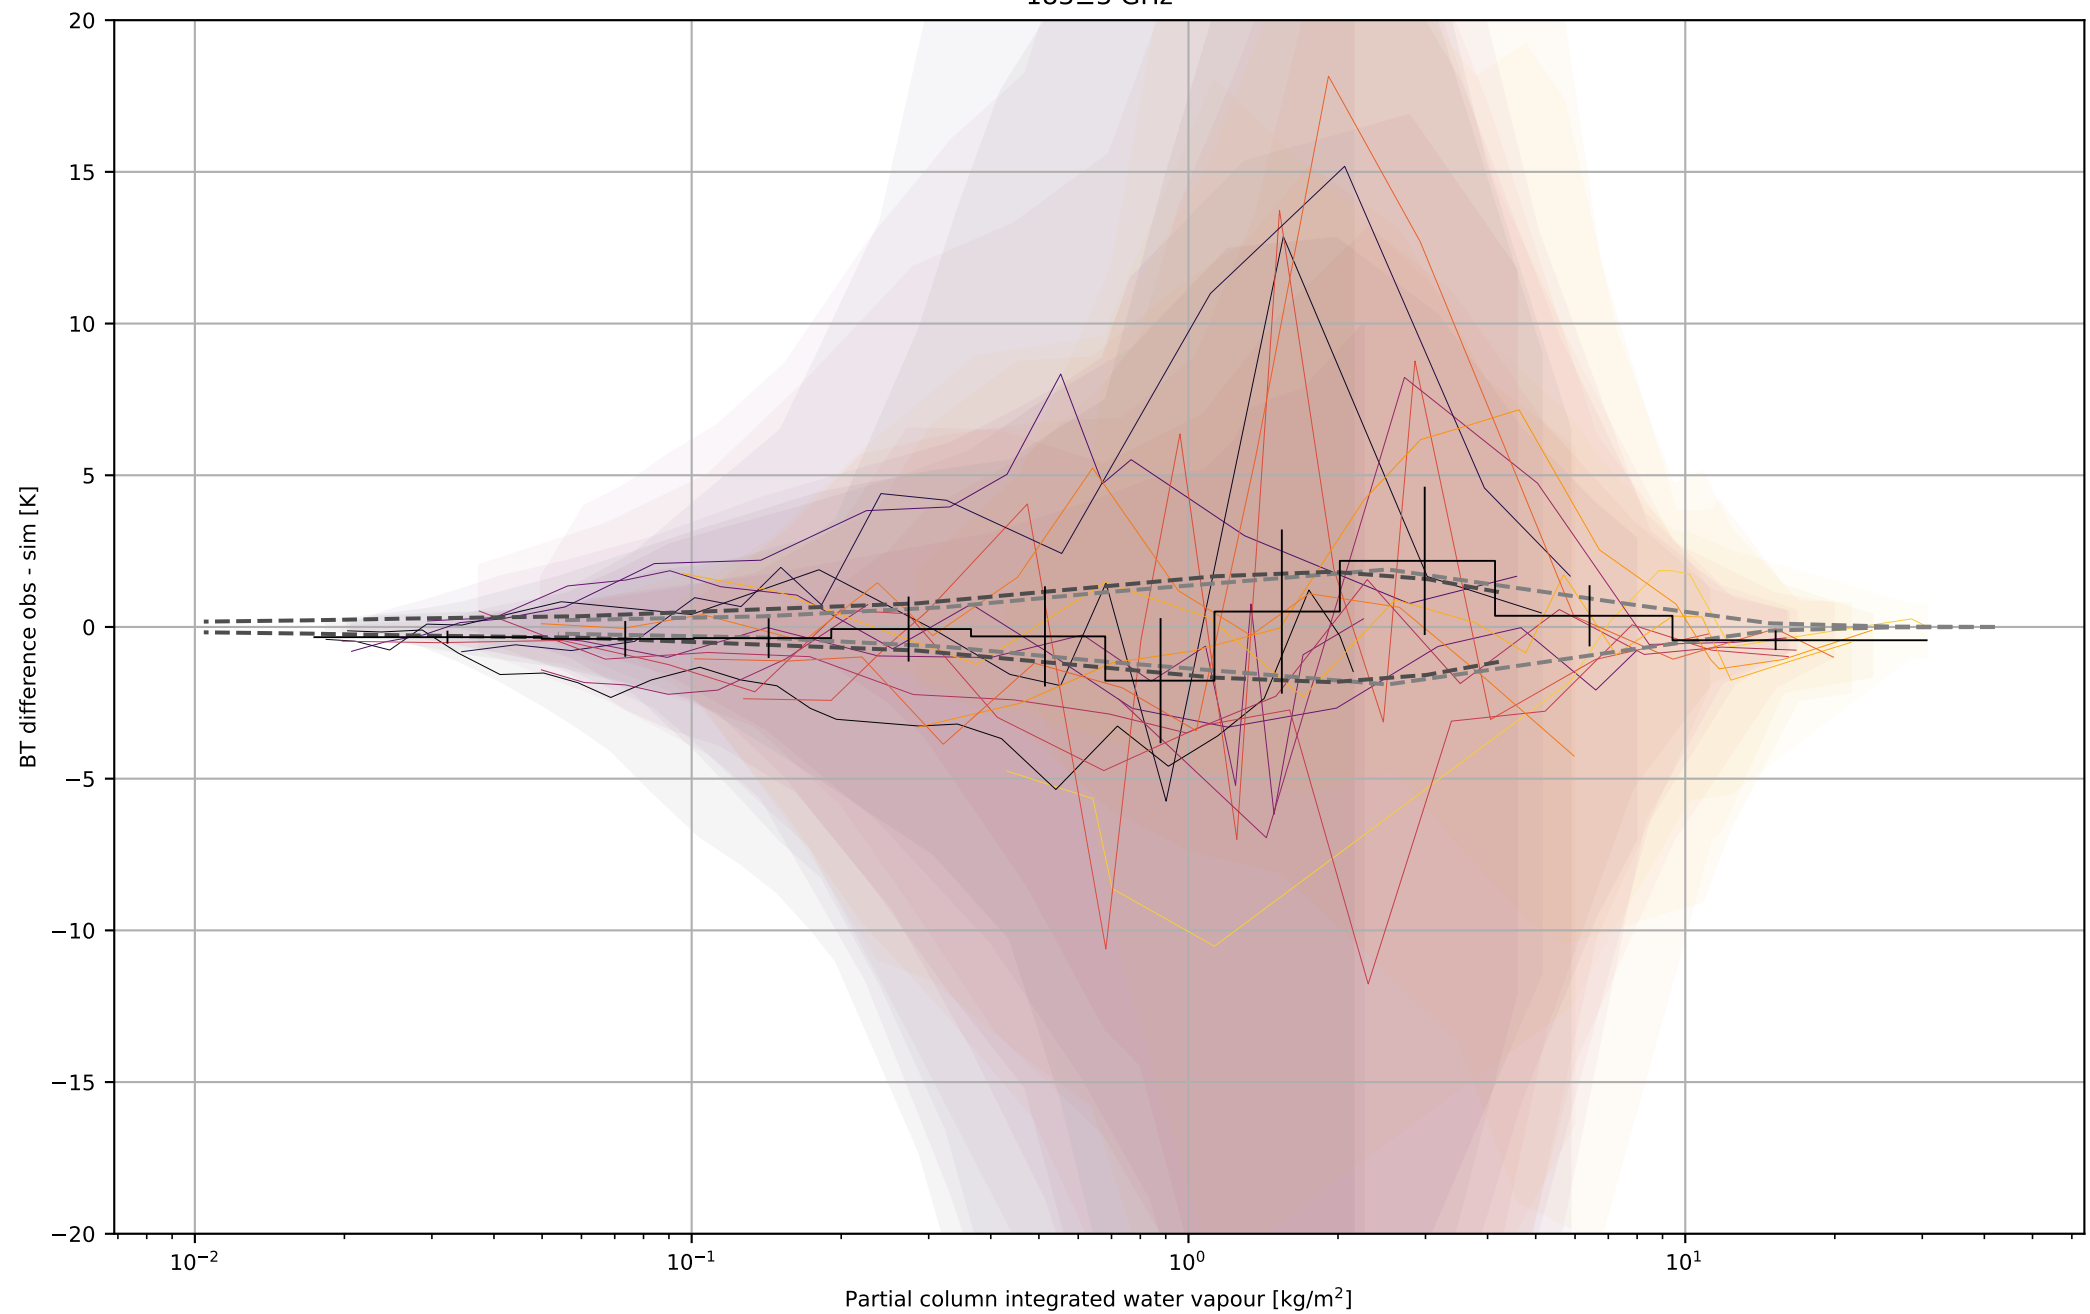



183±7 GHz

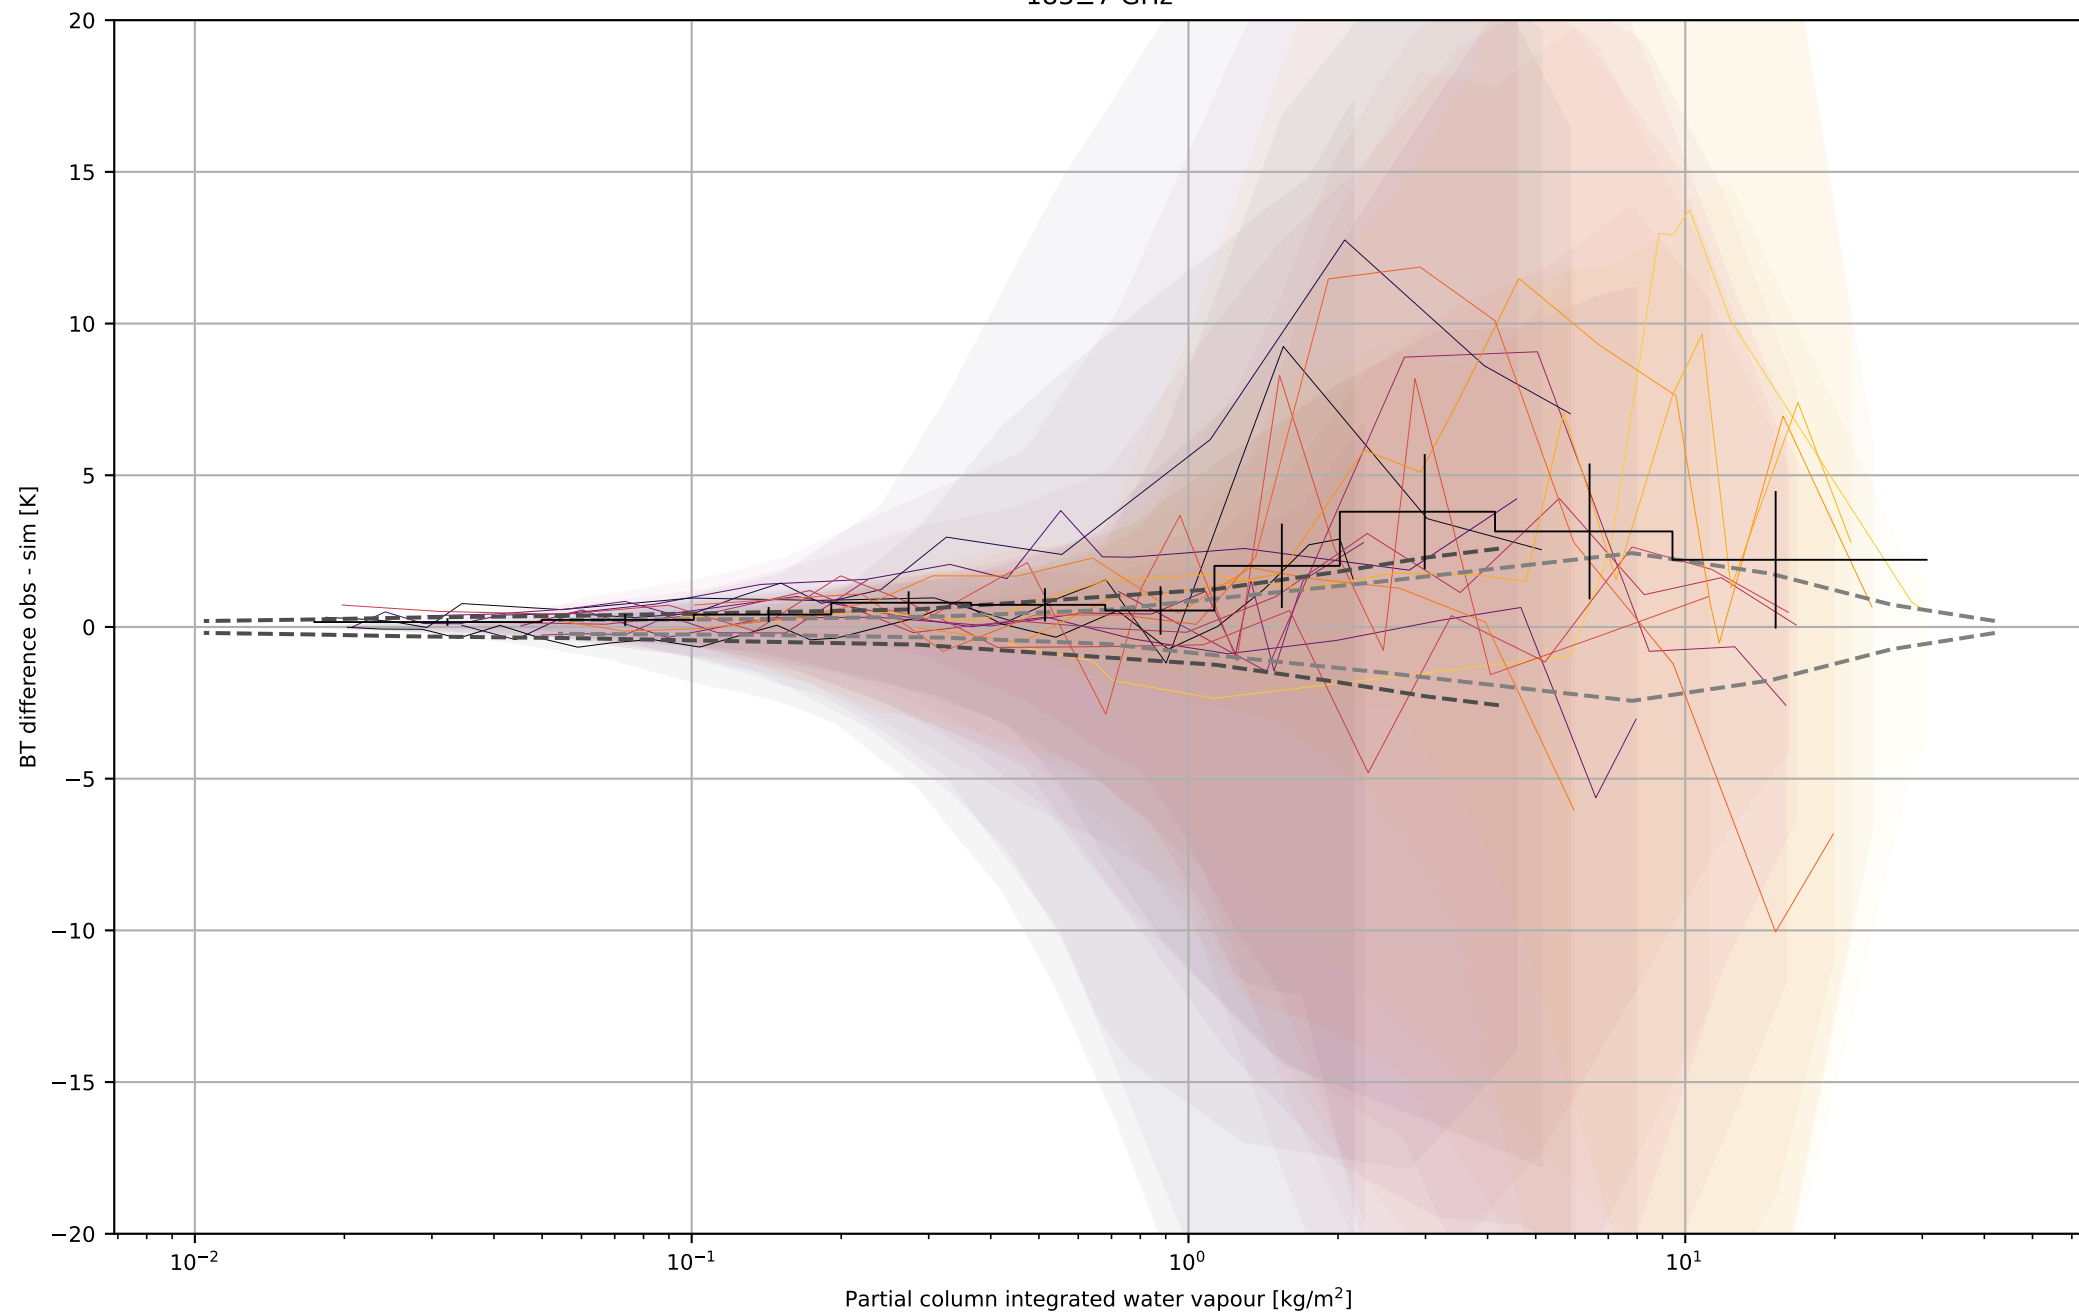



243 GHz

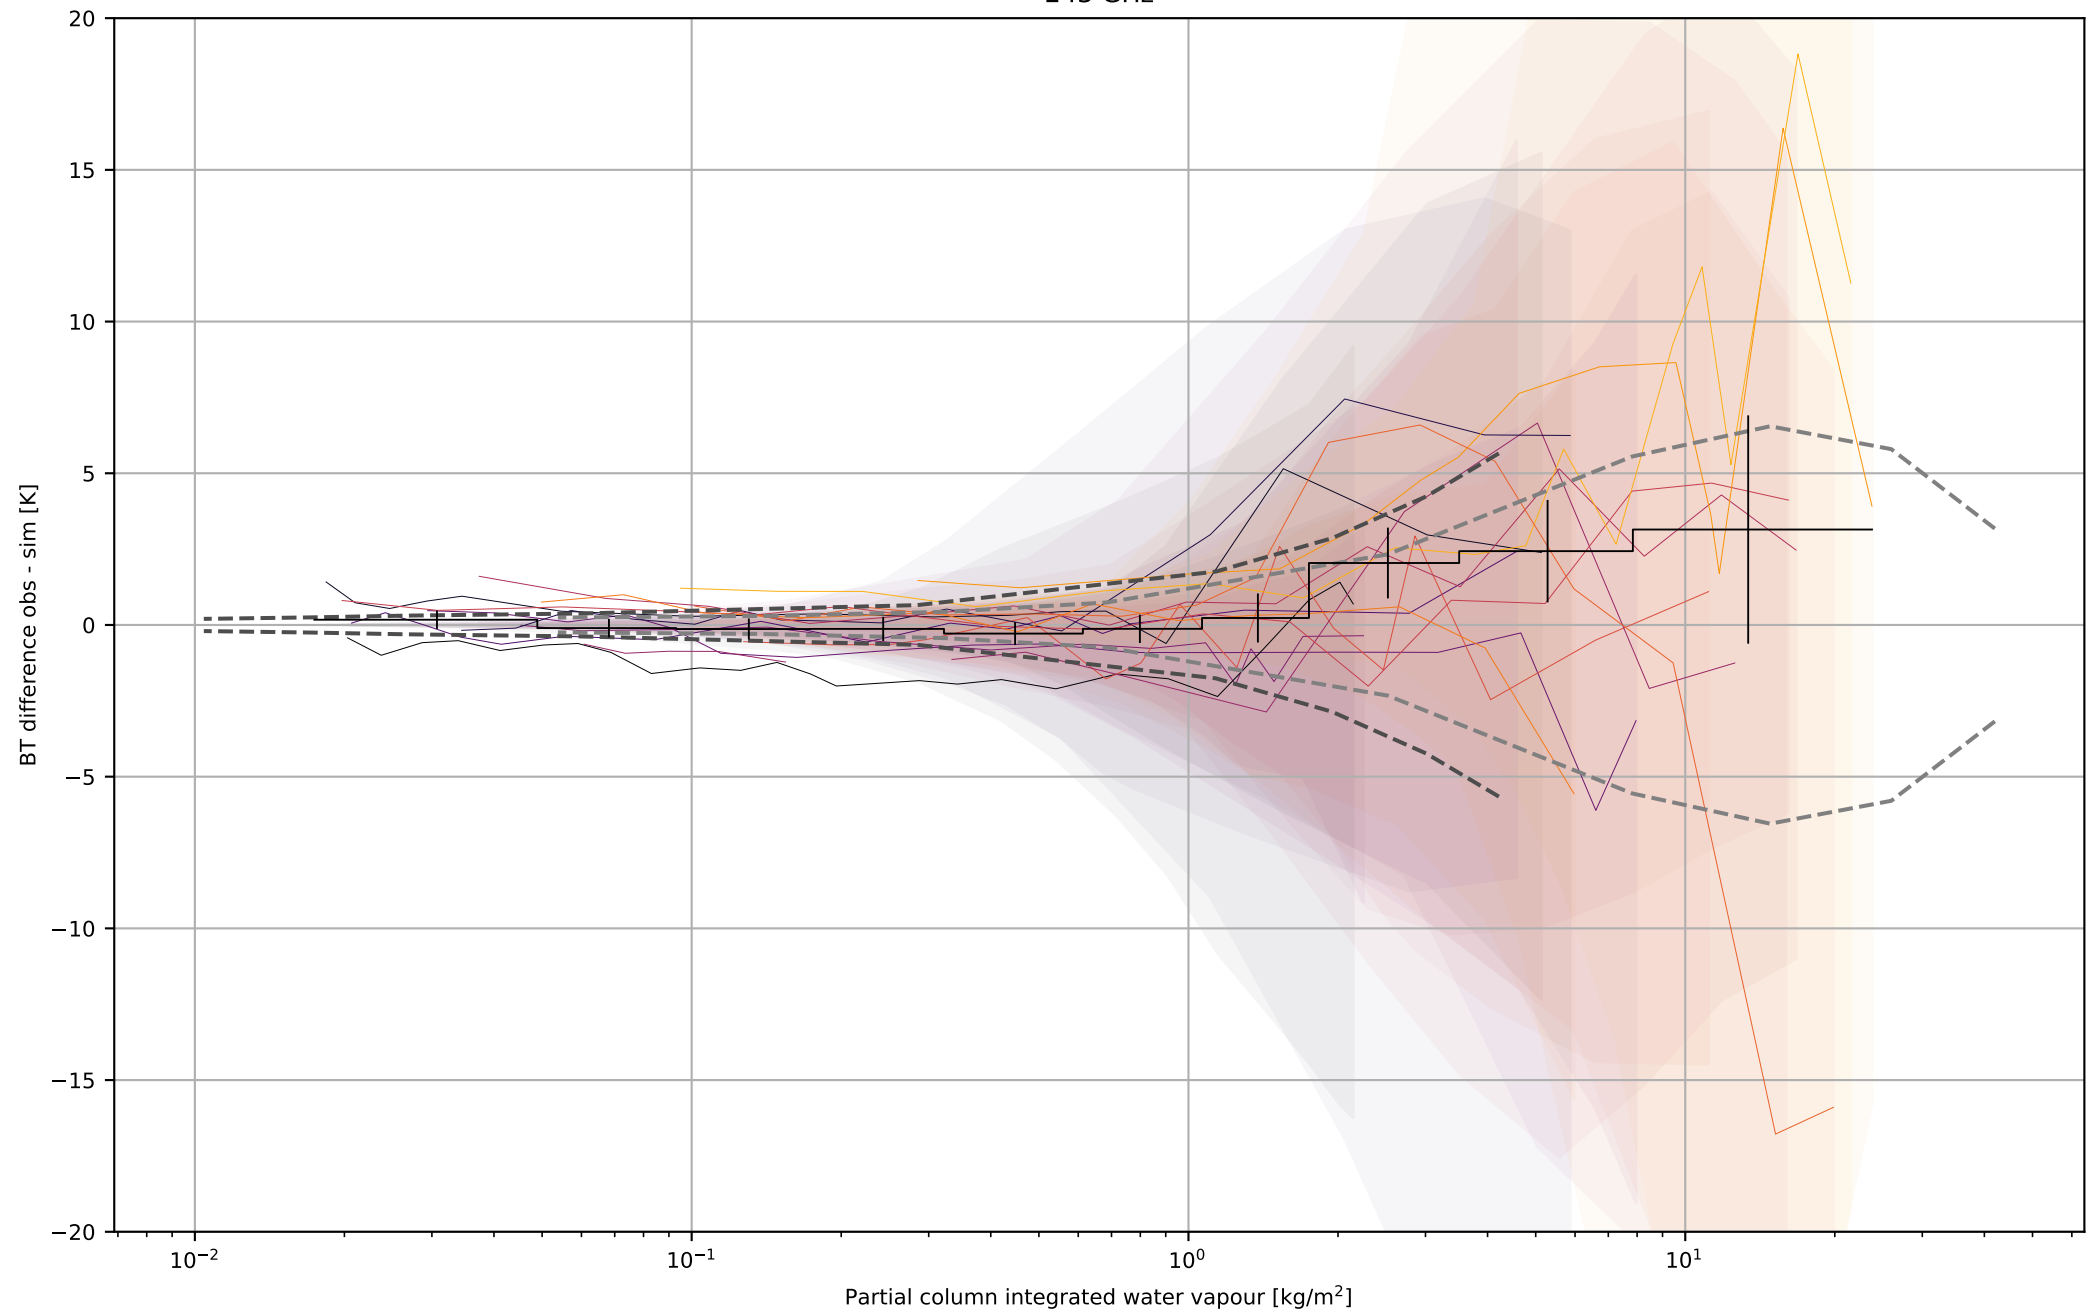



325±1.5 GHz

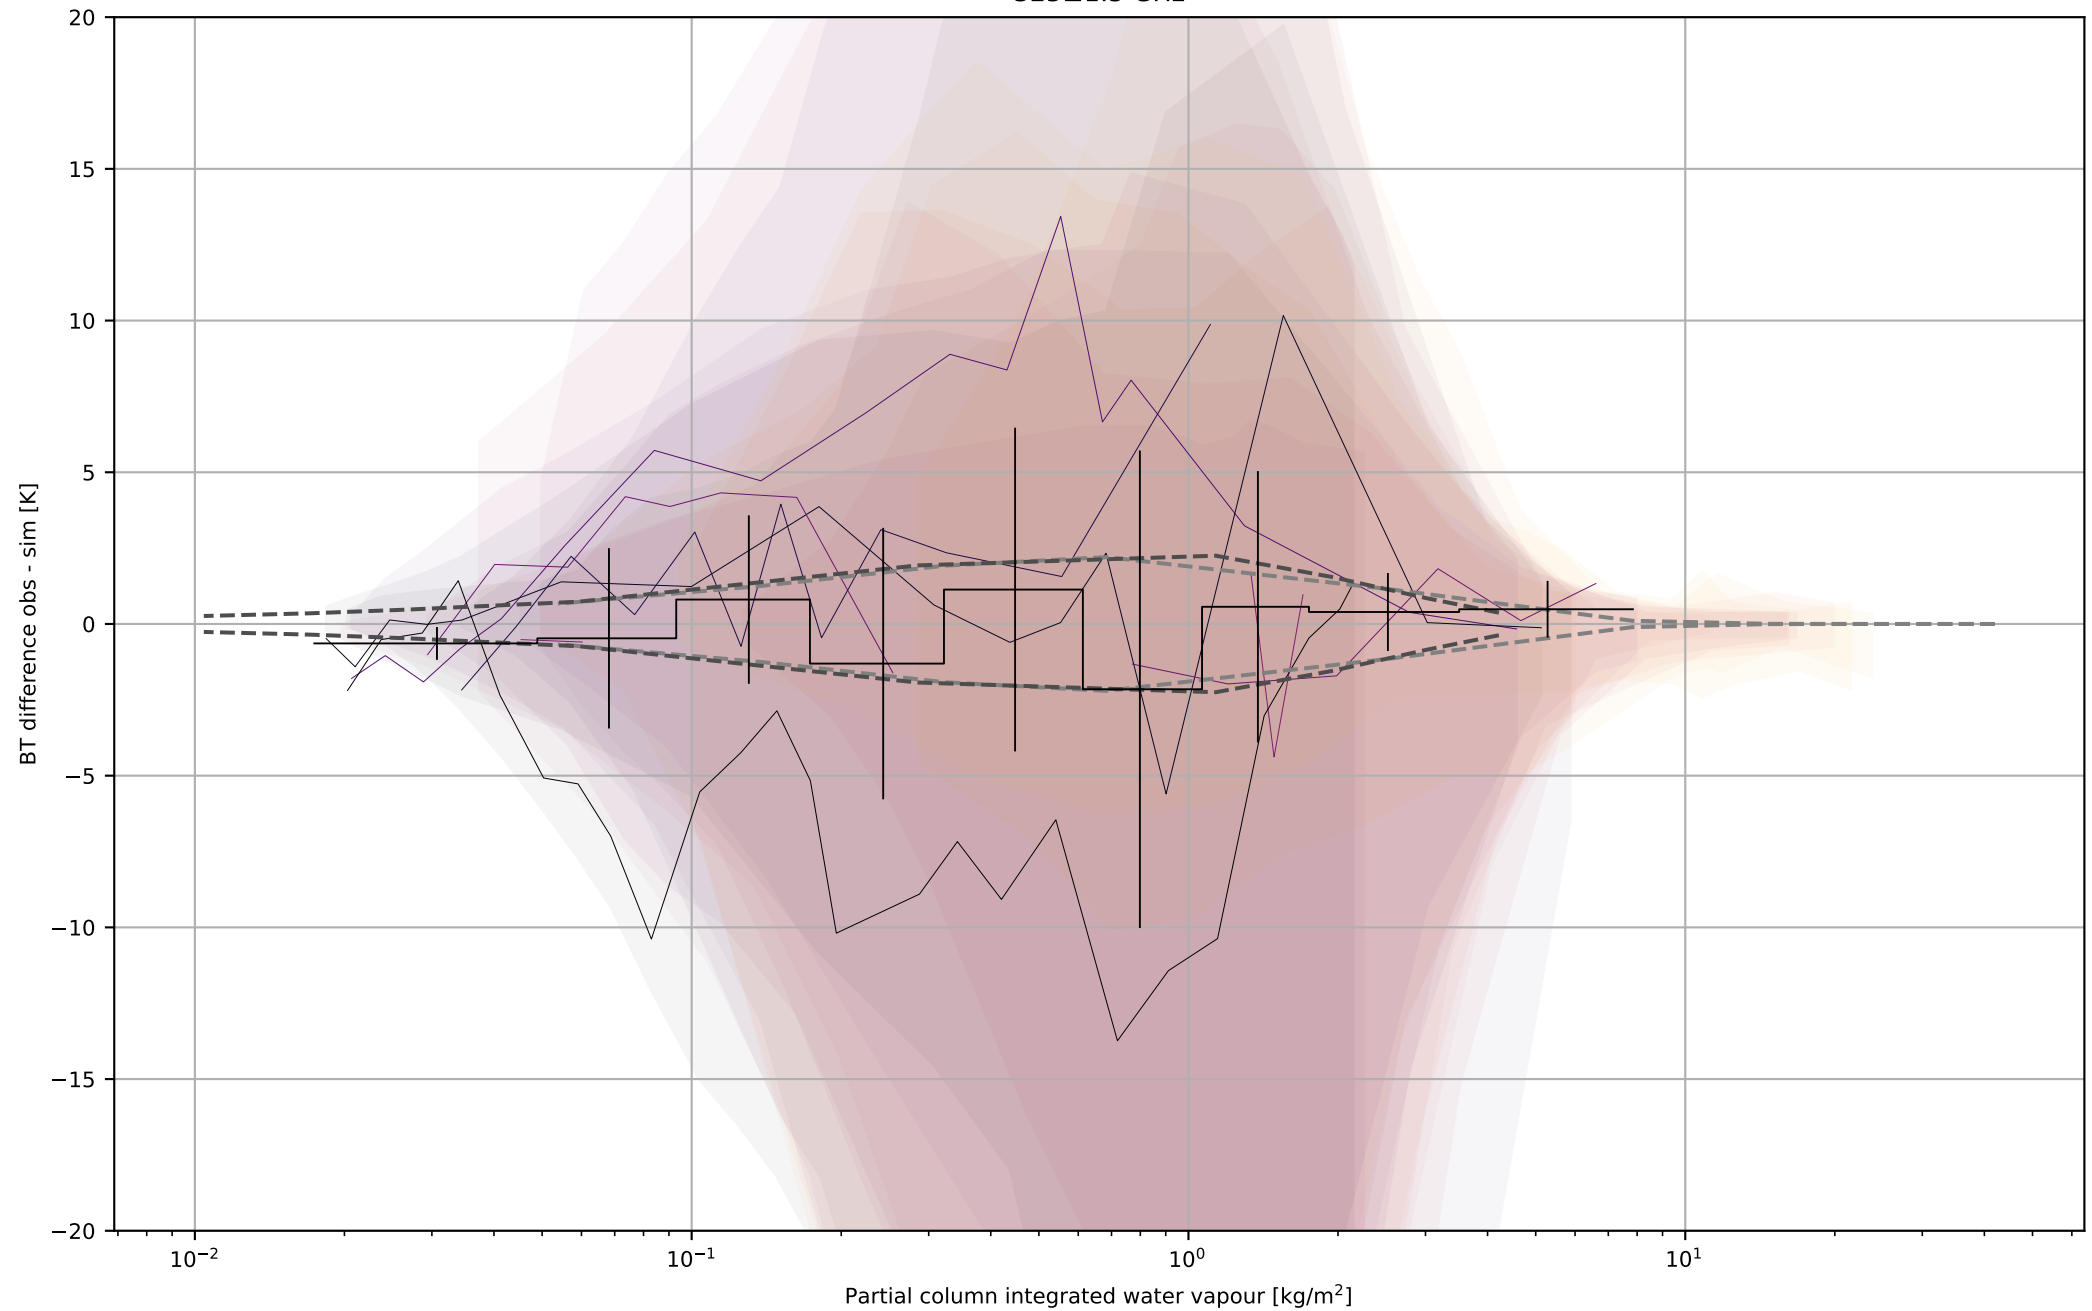

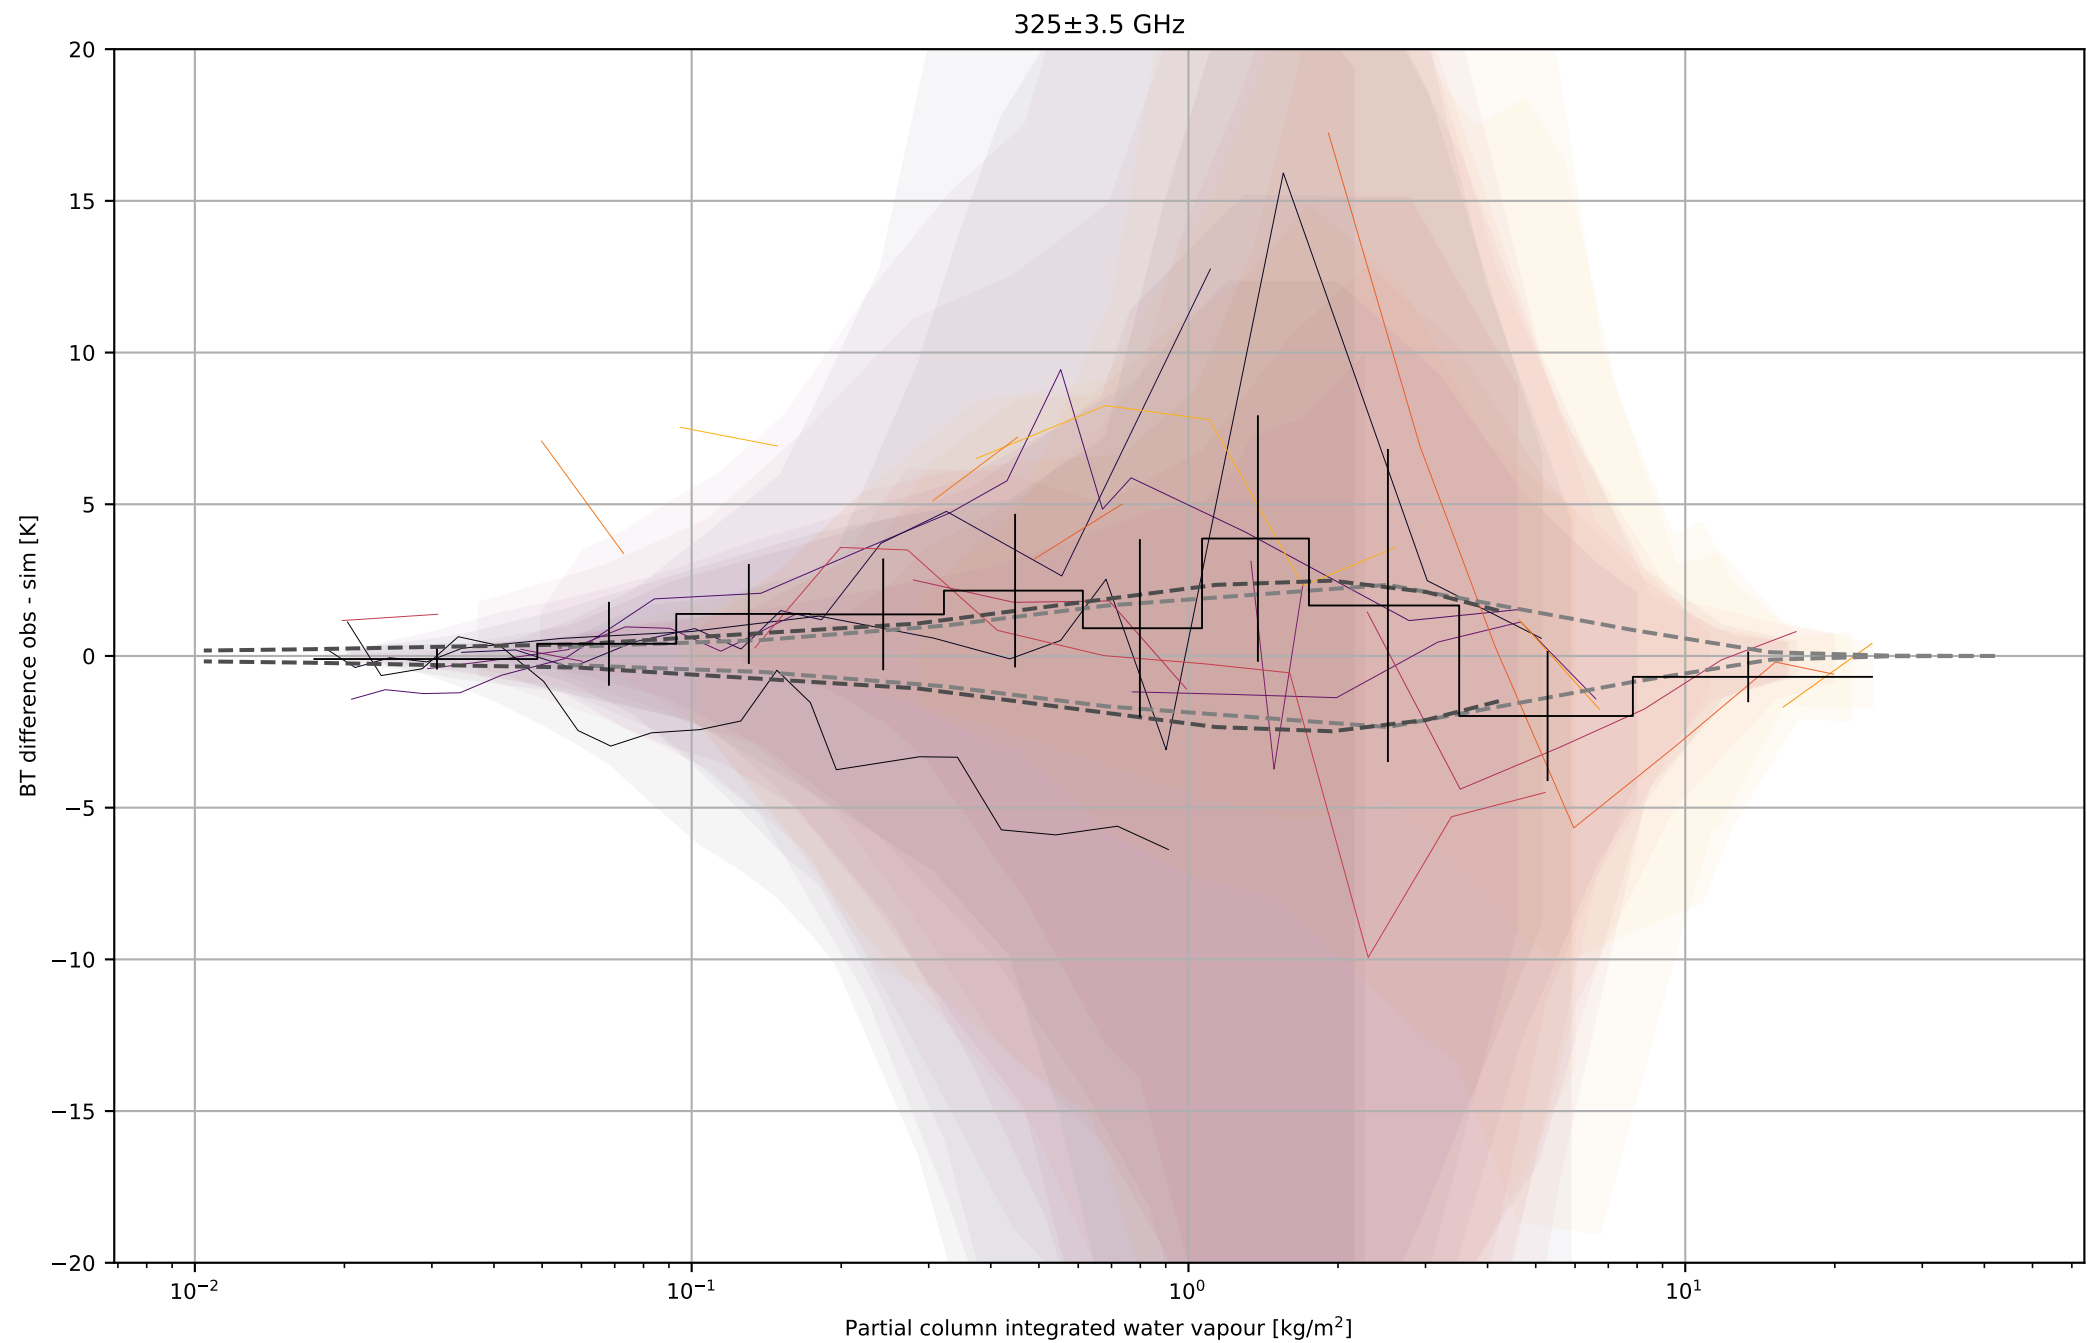



325±9.5 GHz

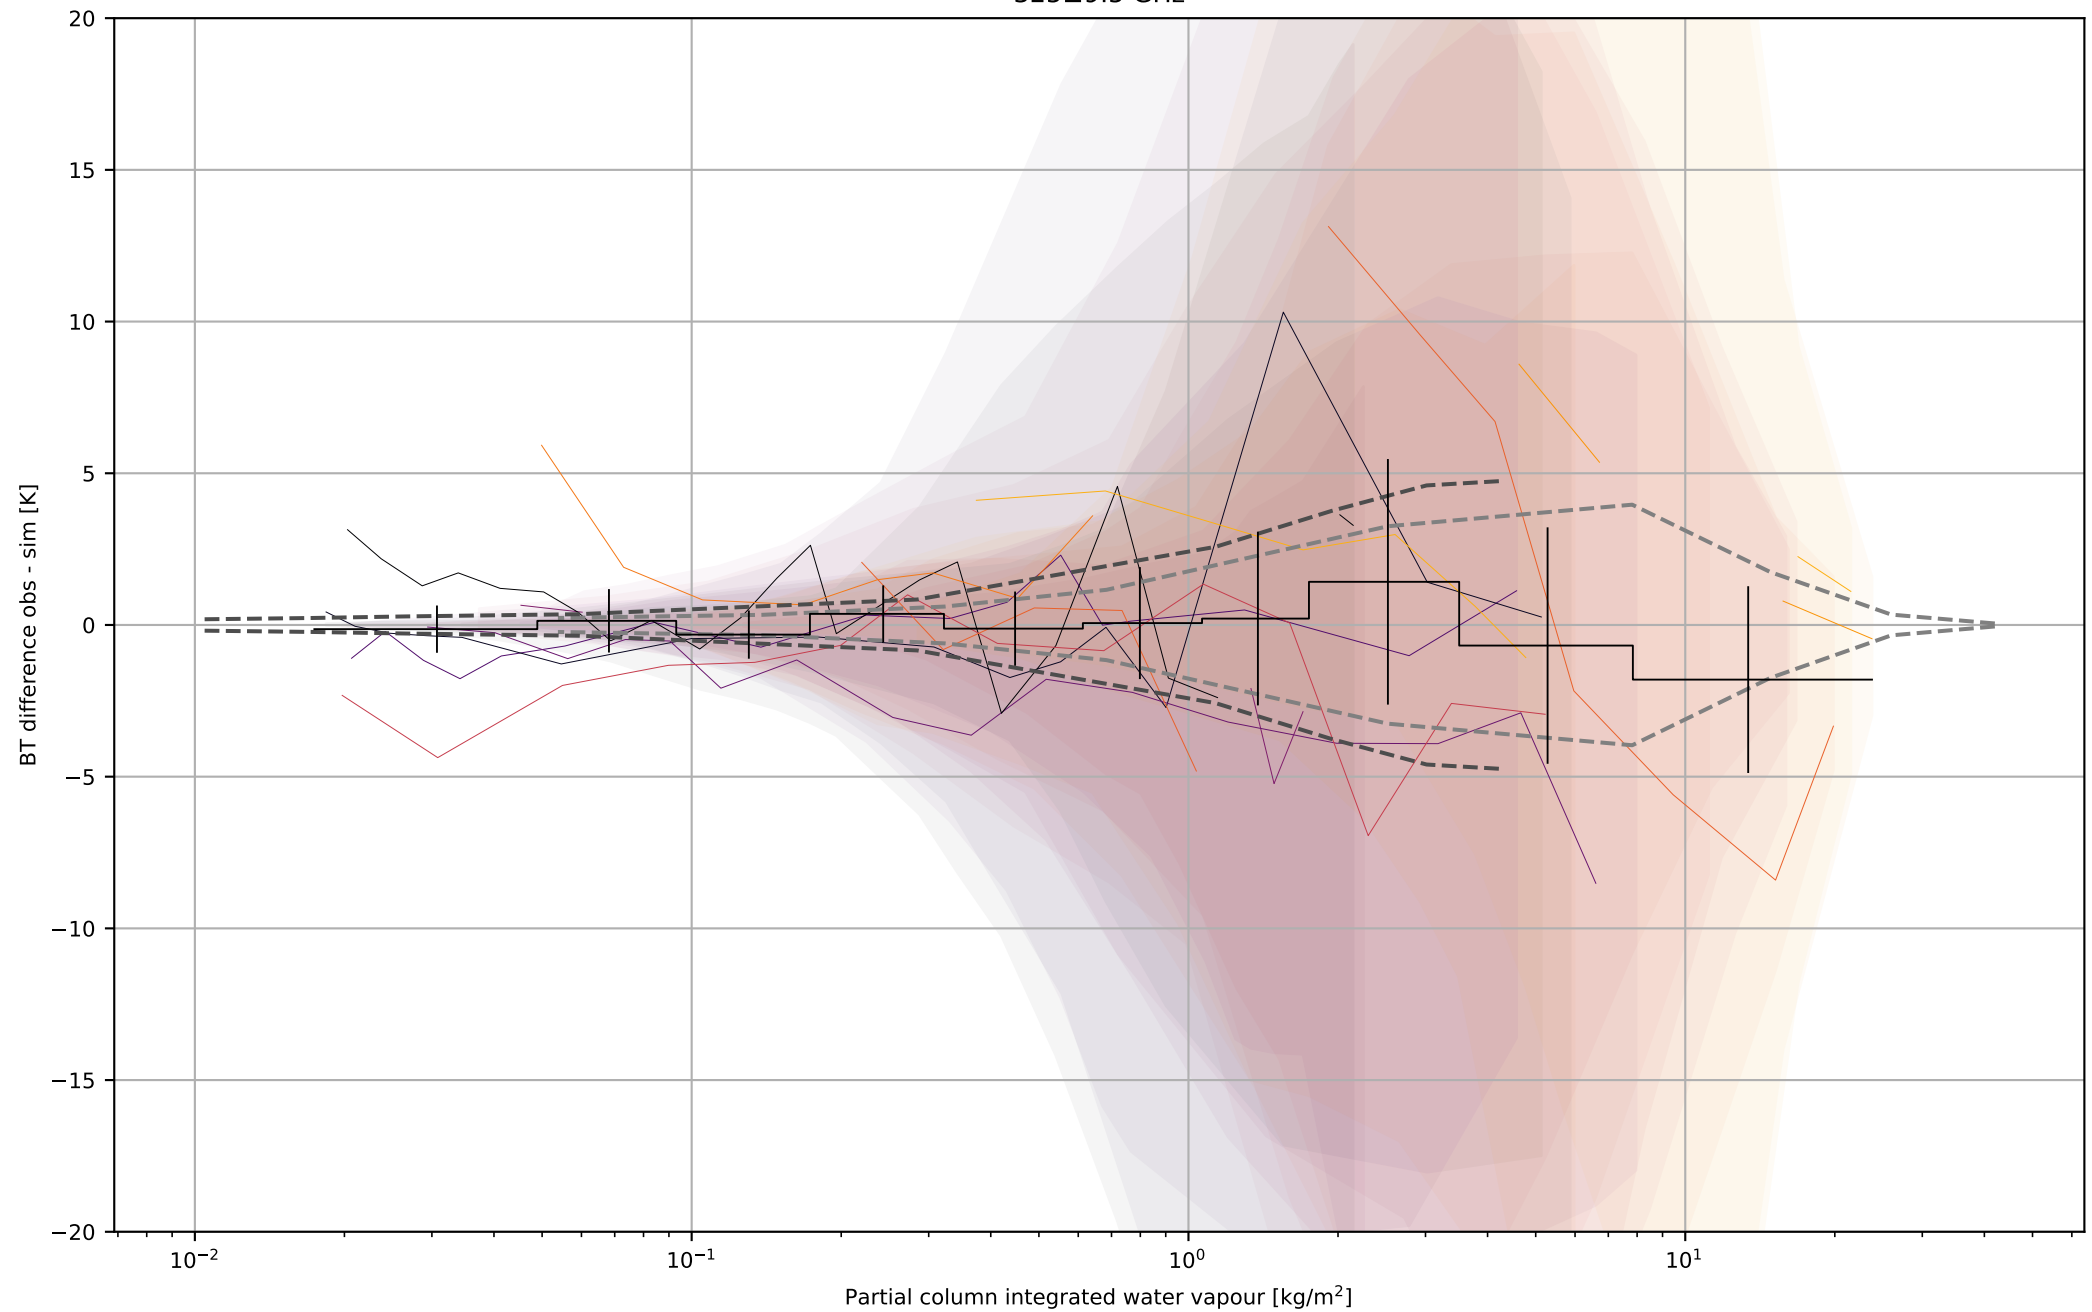



448±1.4 GHz

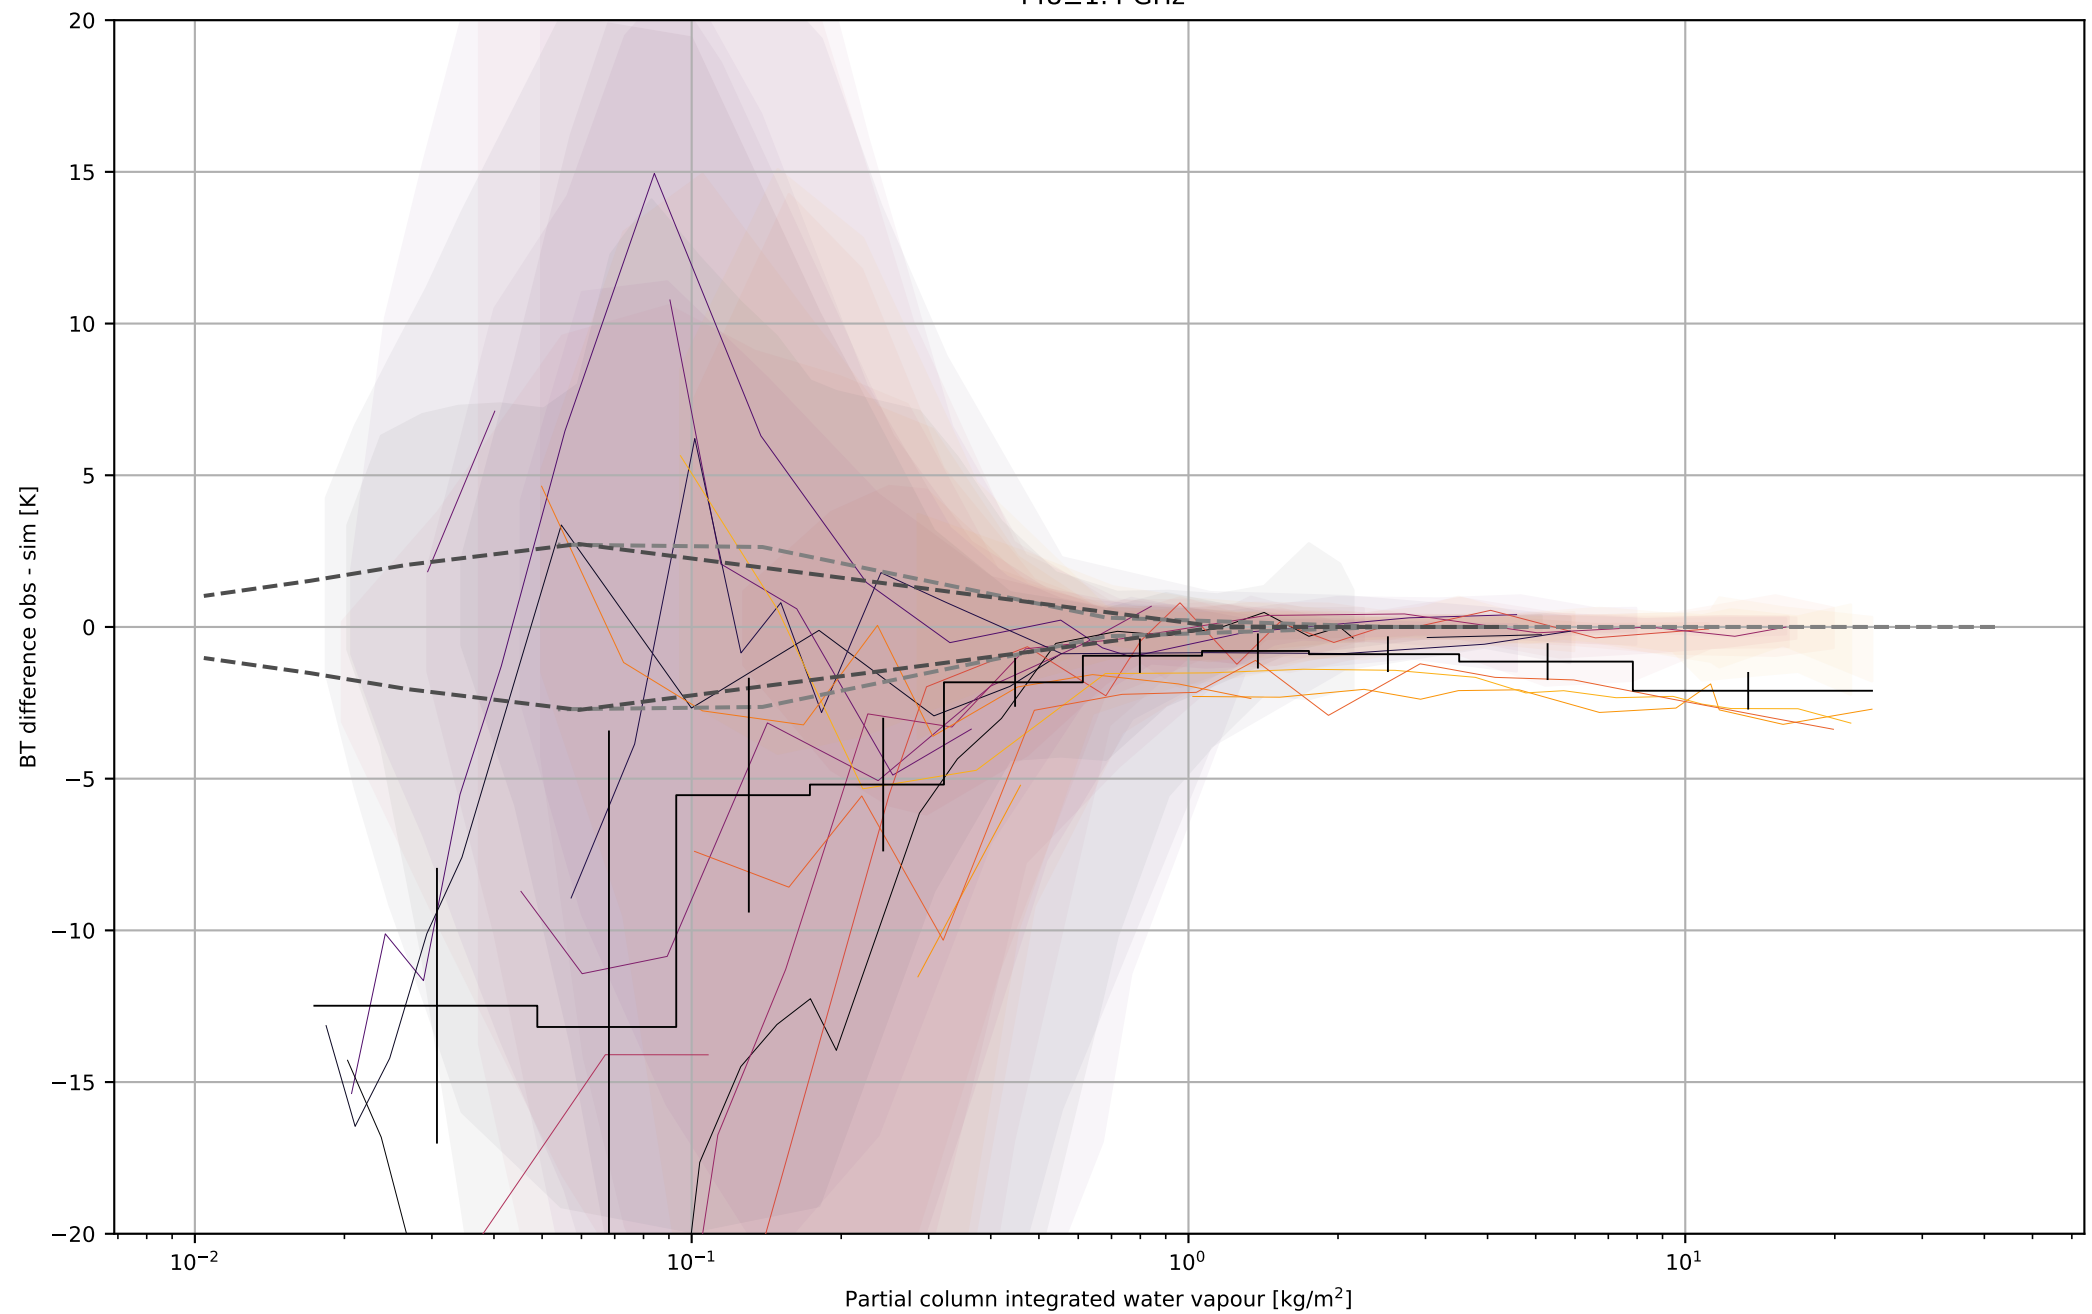



448 $\pm$ 3.0 GHz

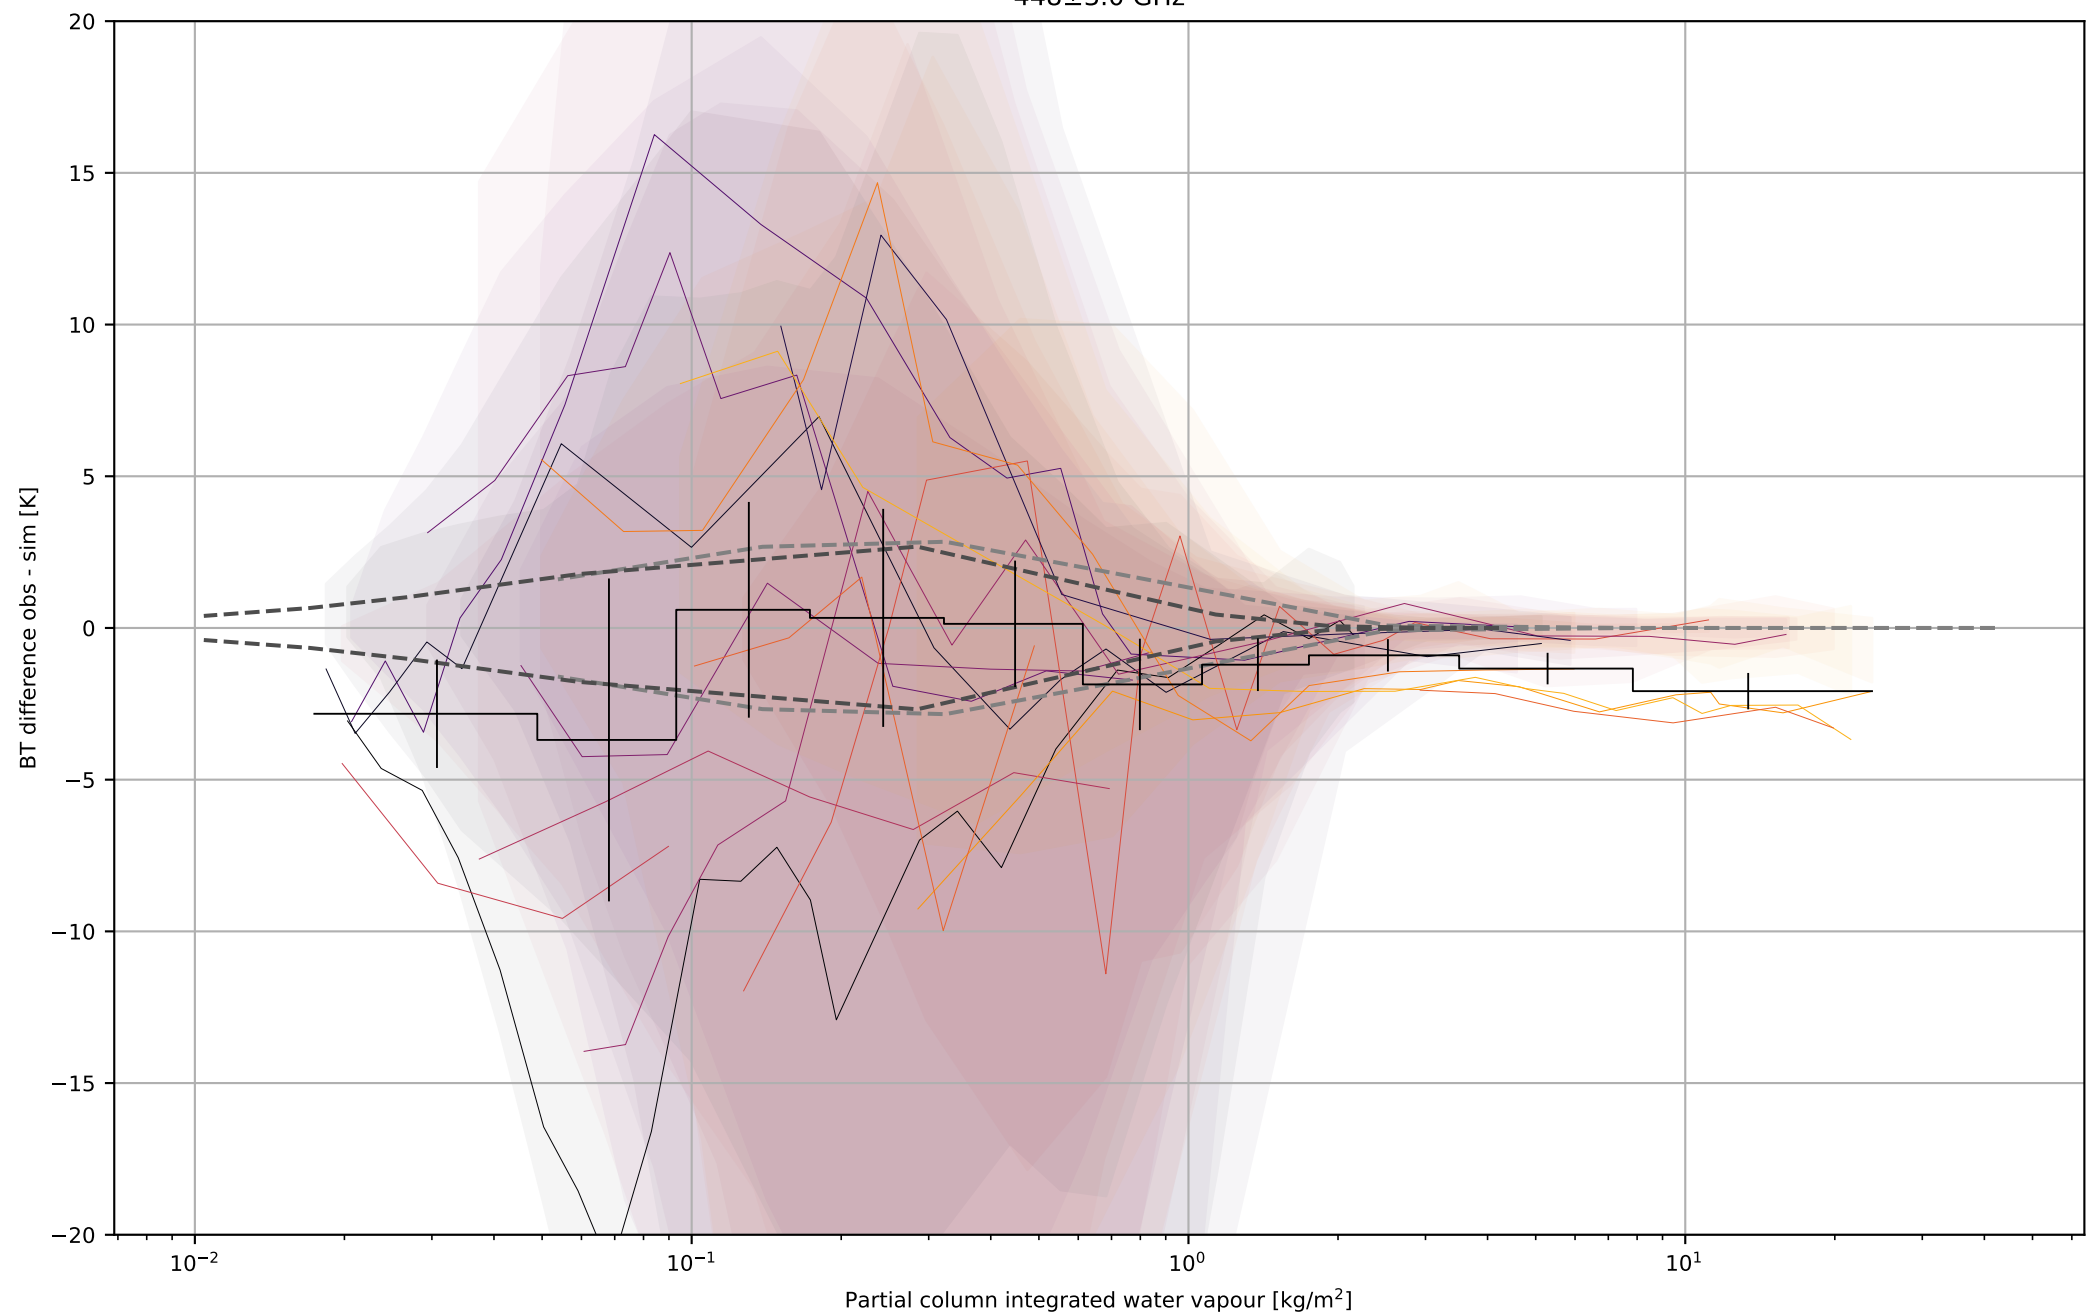





448 $\pm$ 7.2 GHz

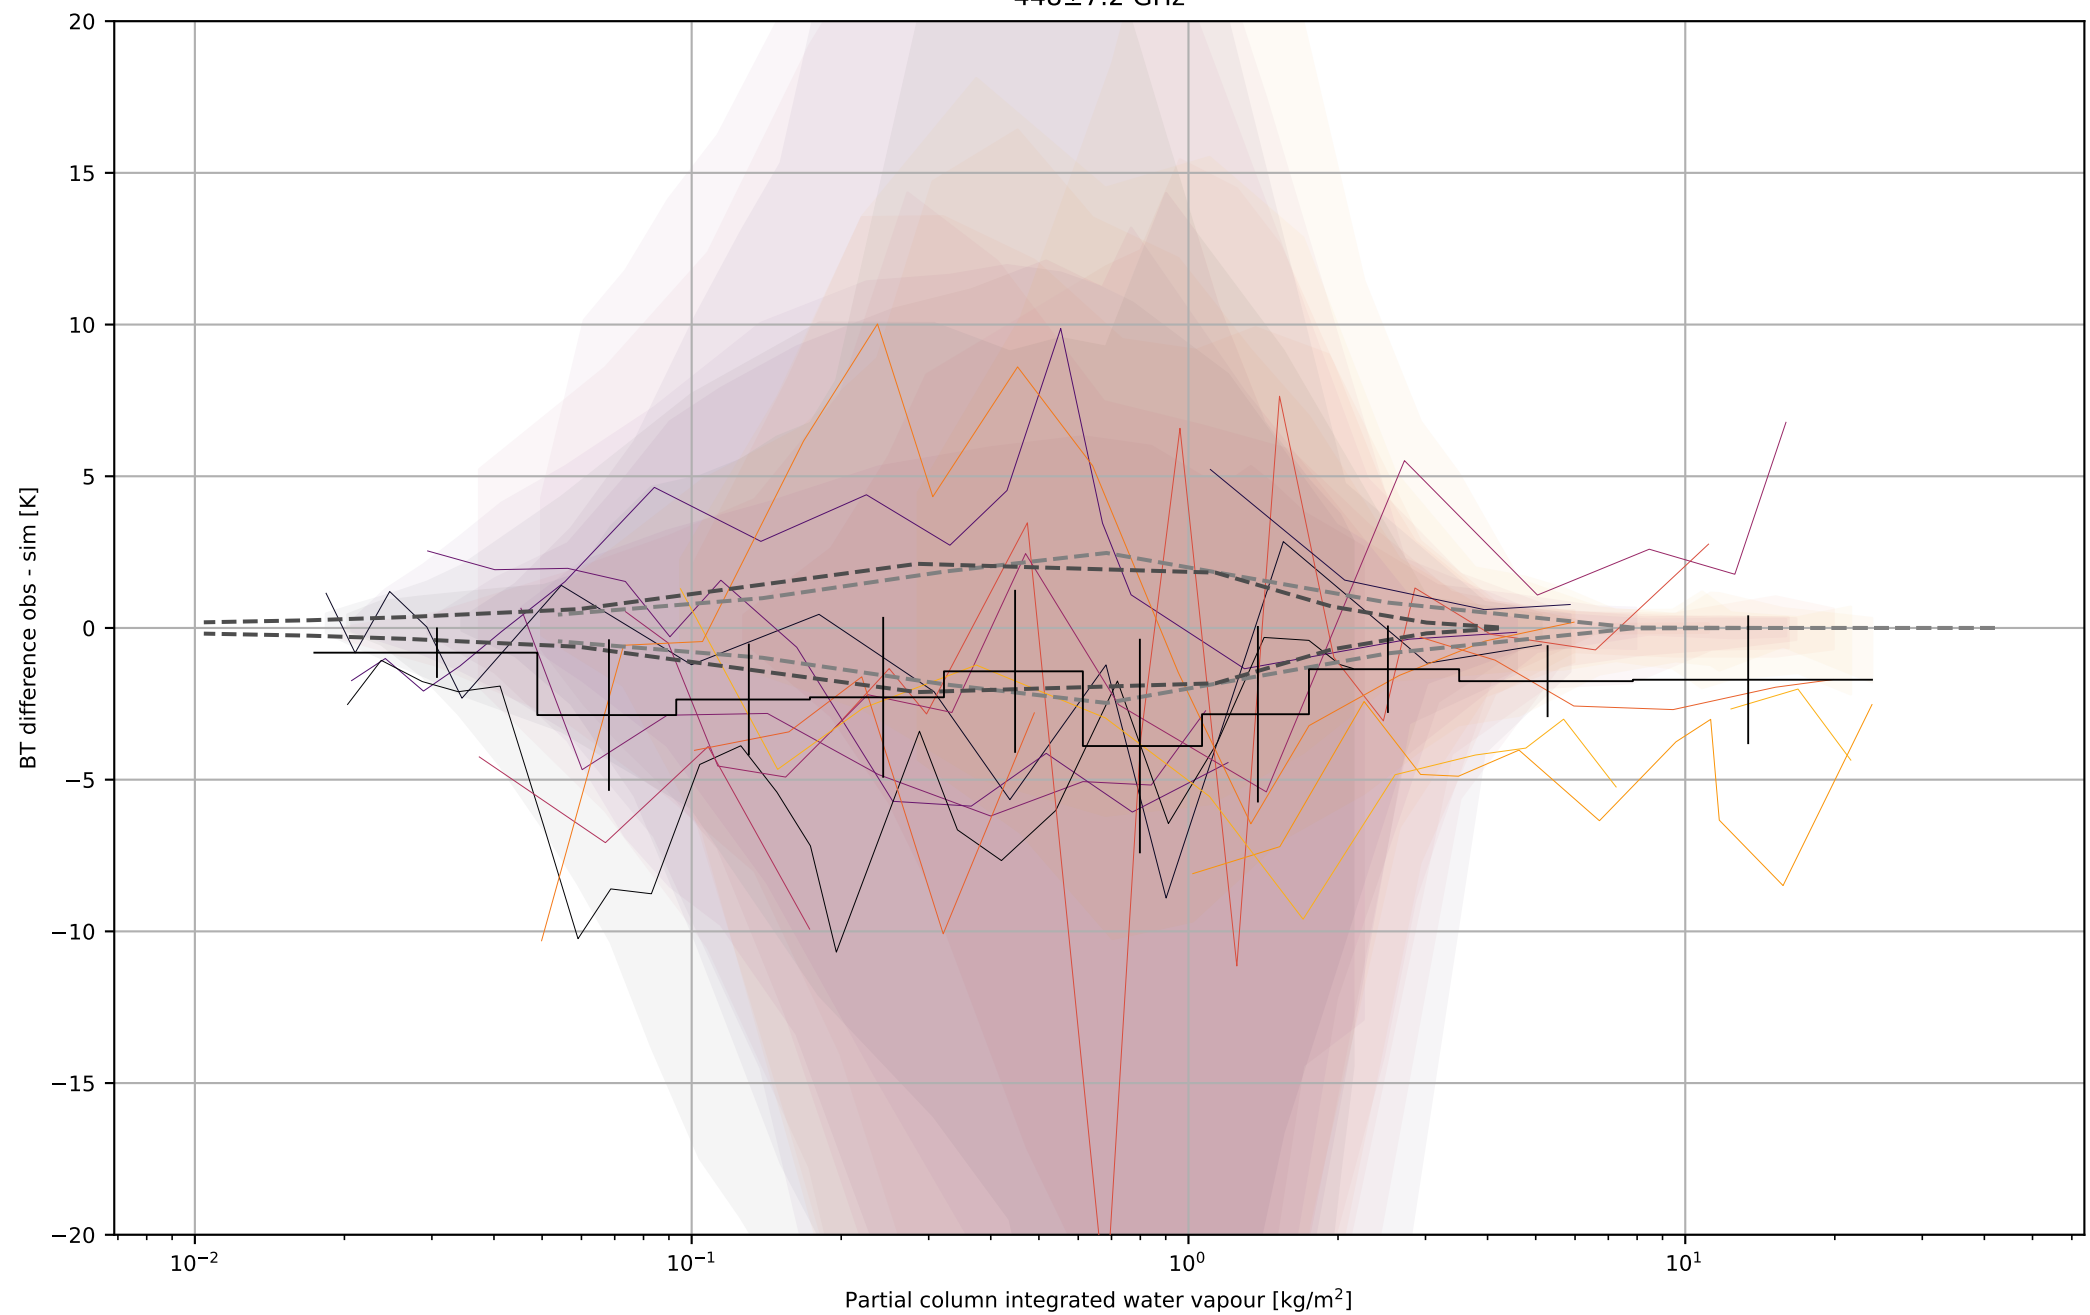



664 GHz

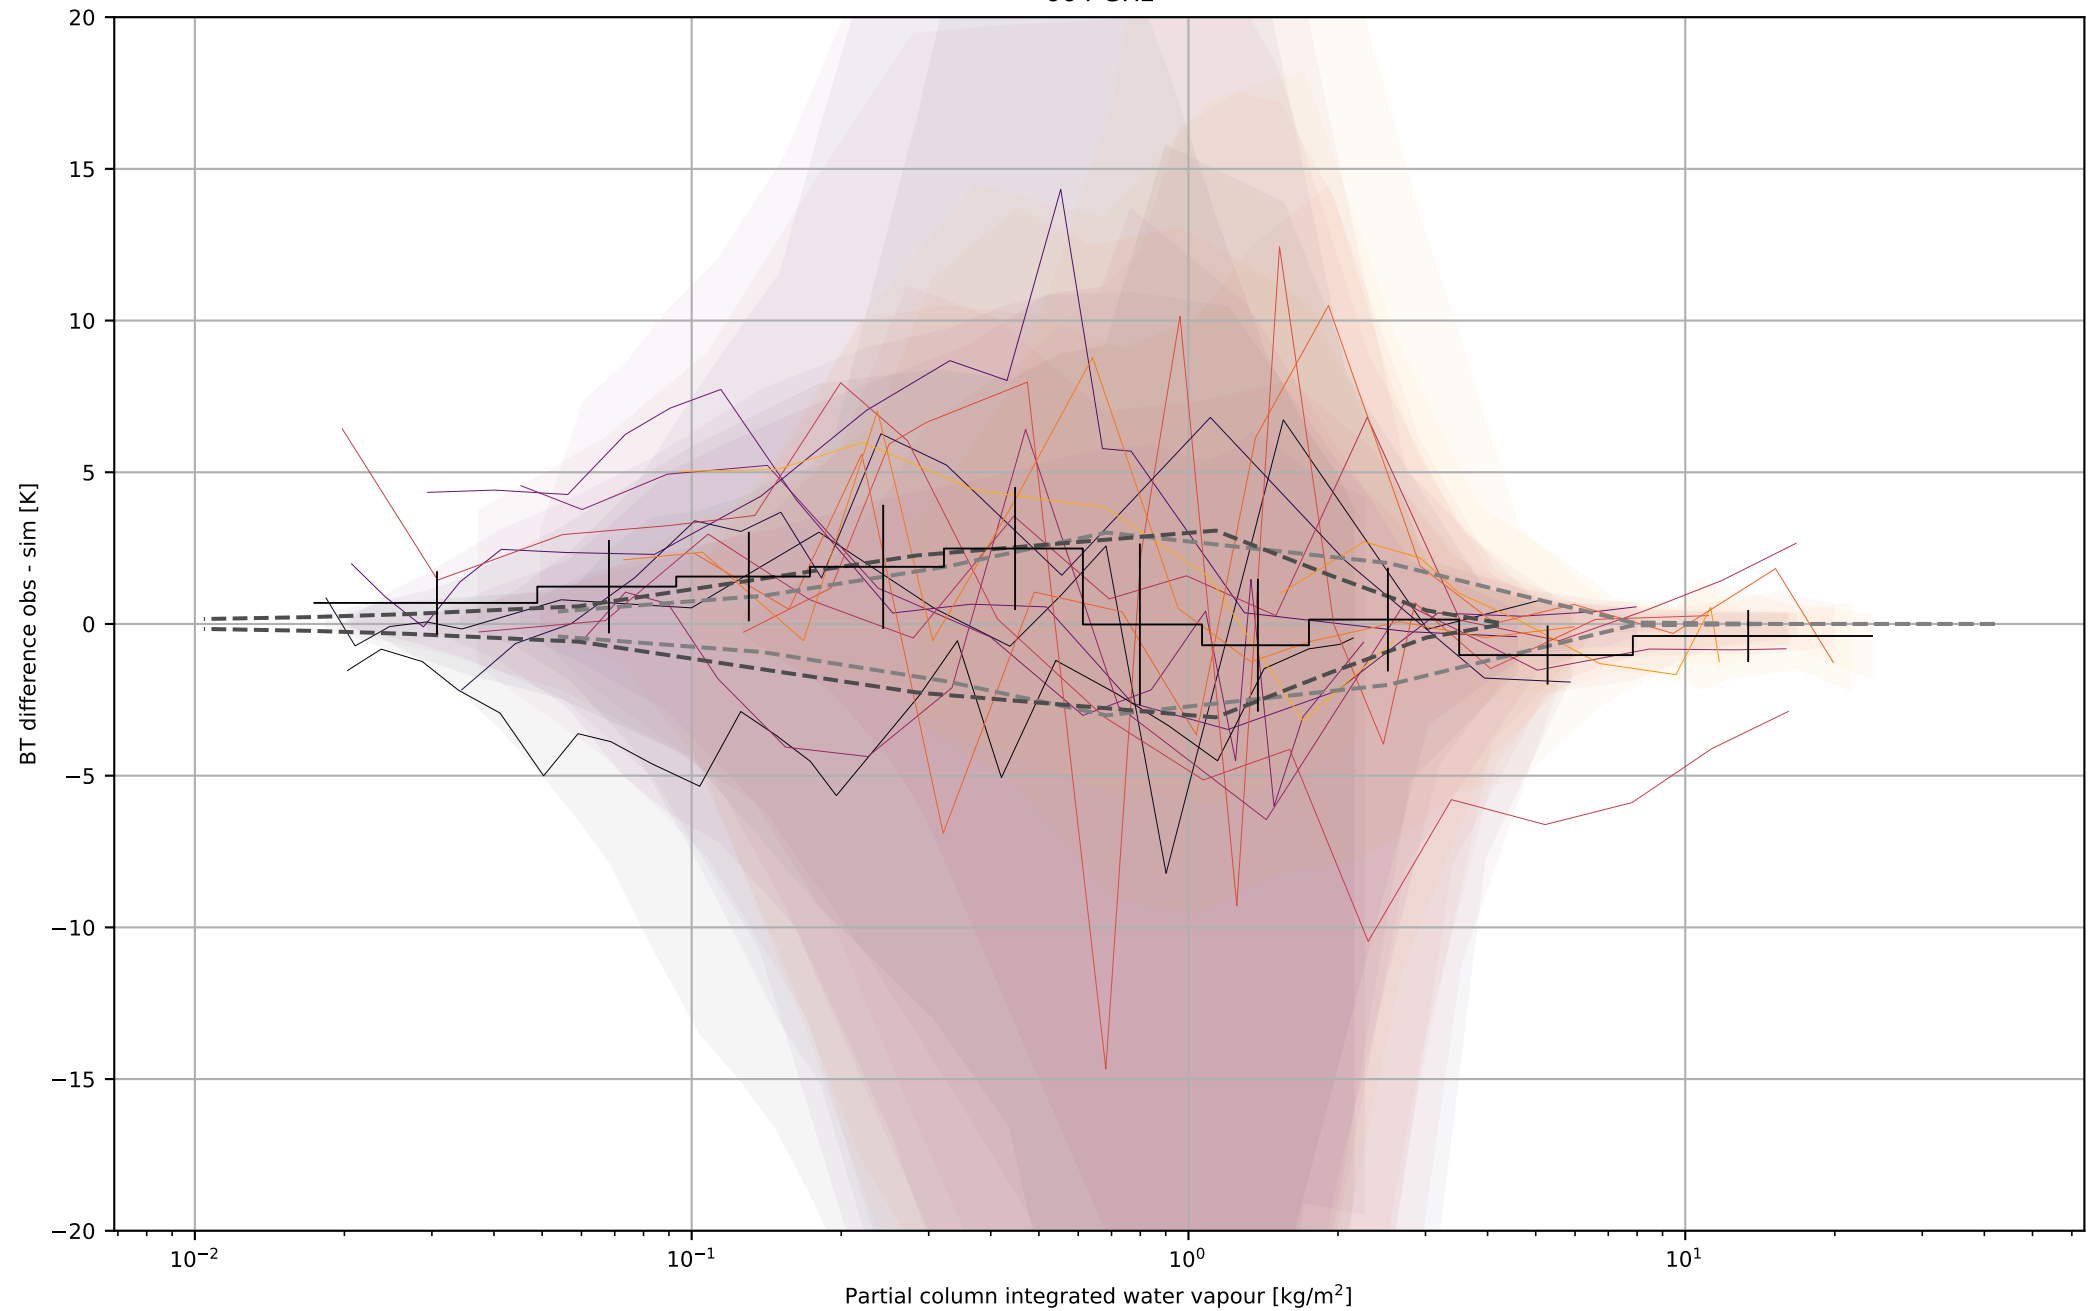

Supplement: Supplementary file 1 [file egusphere-2024-229-supplement.zip]

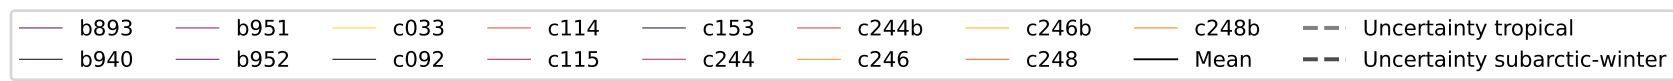

89 GHz

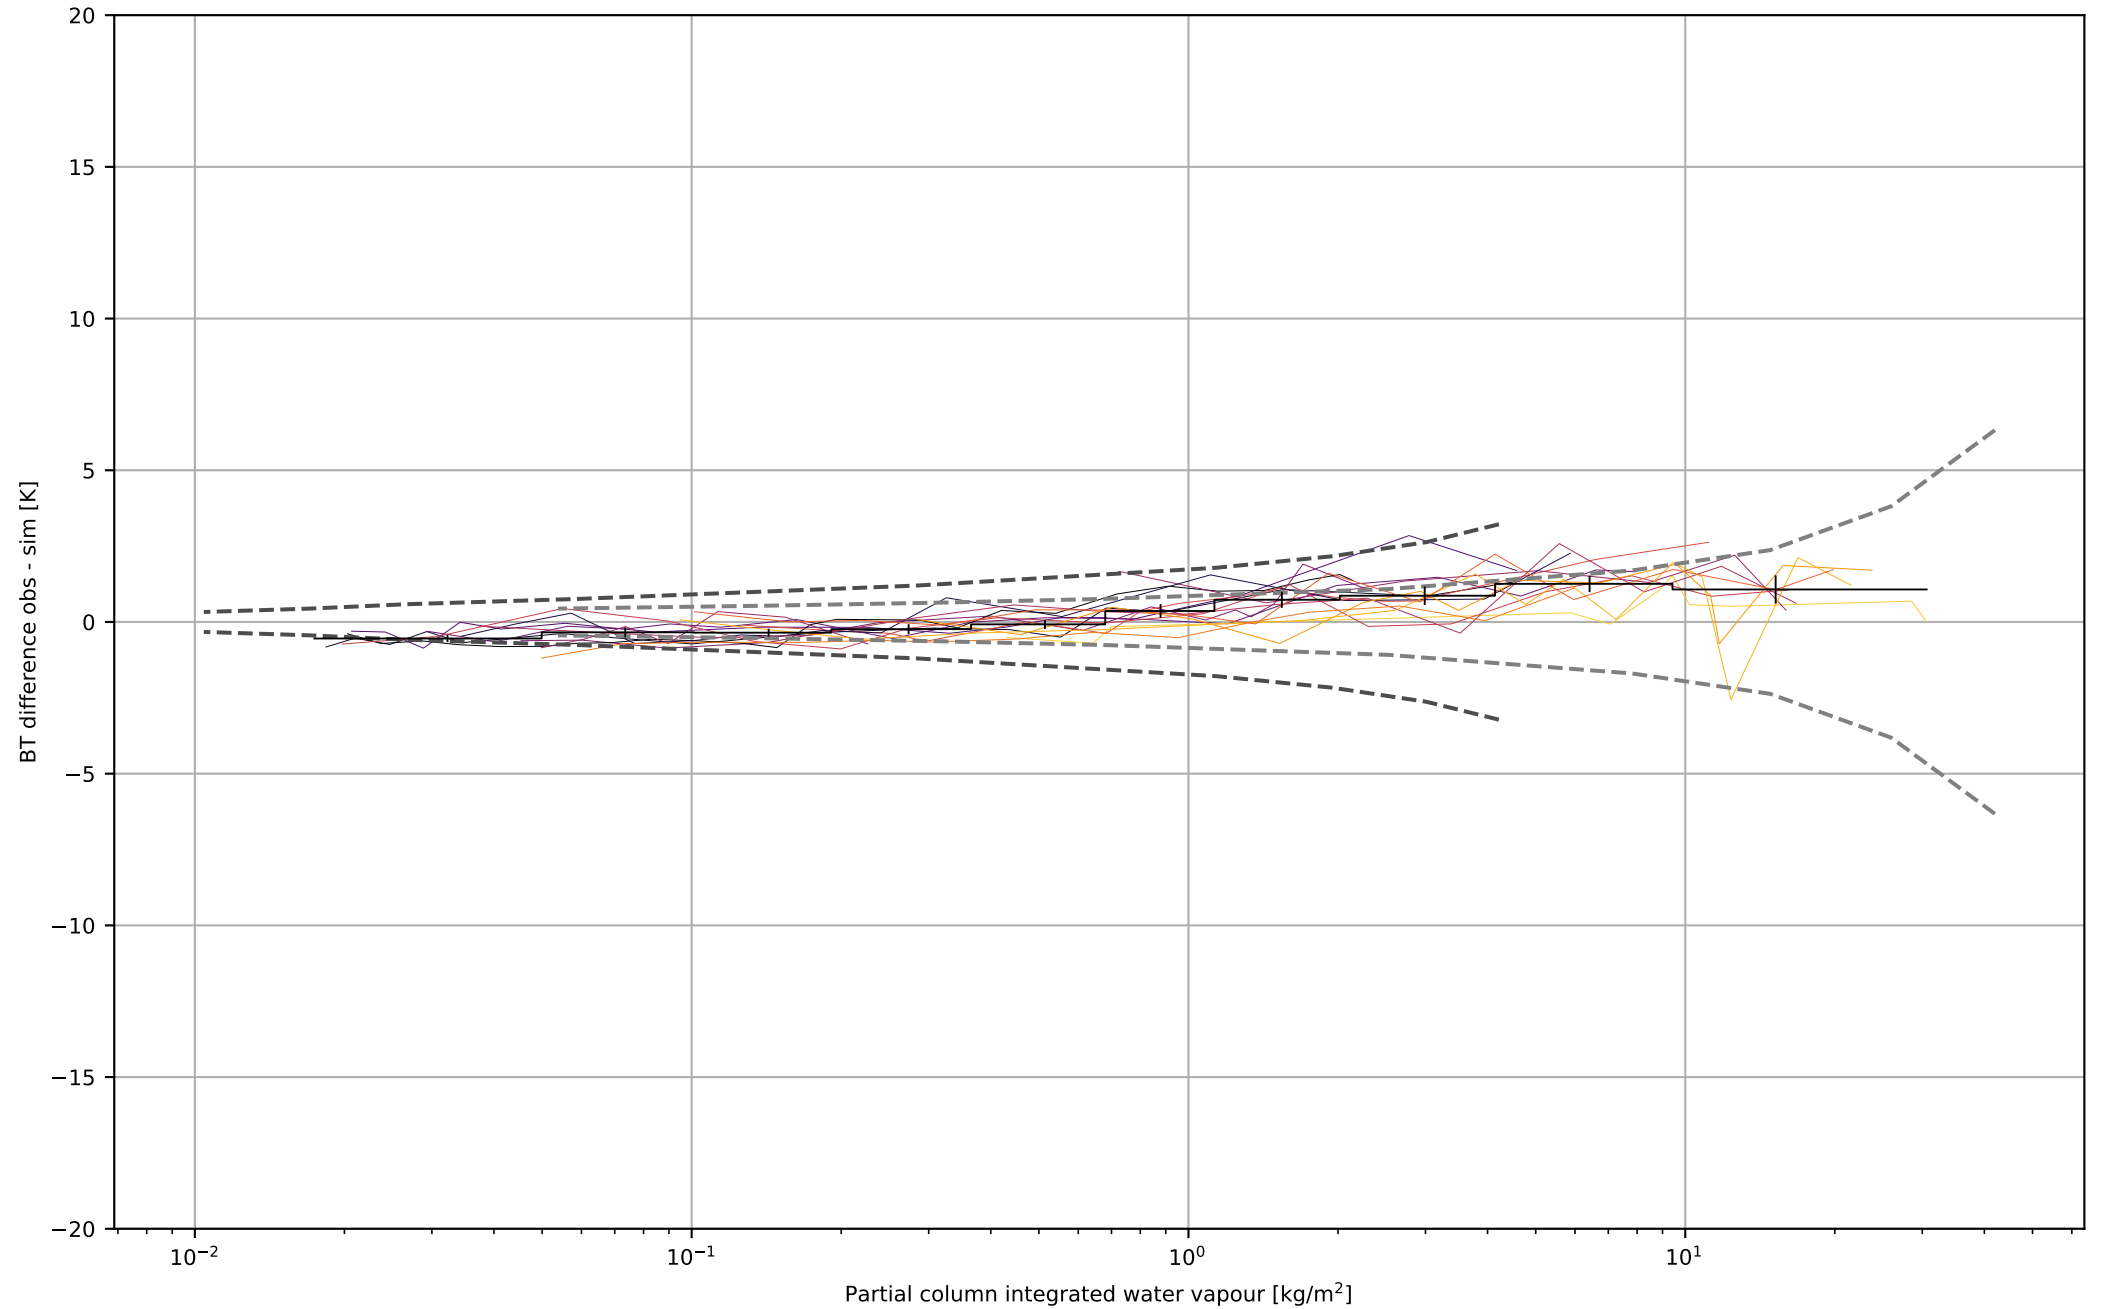





118±1.1 GHz

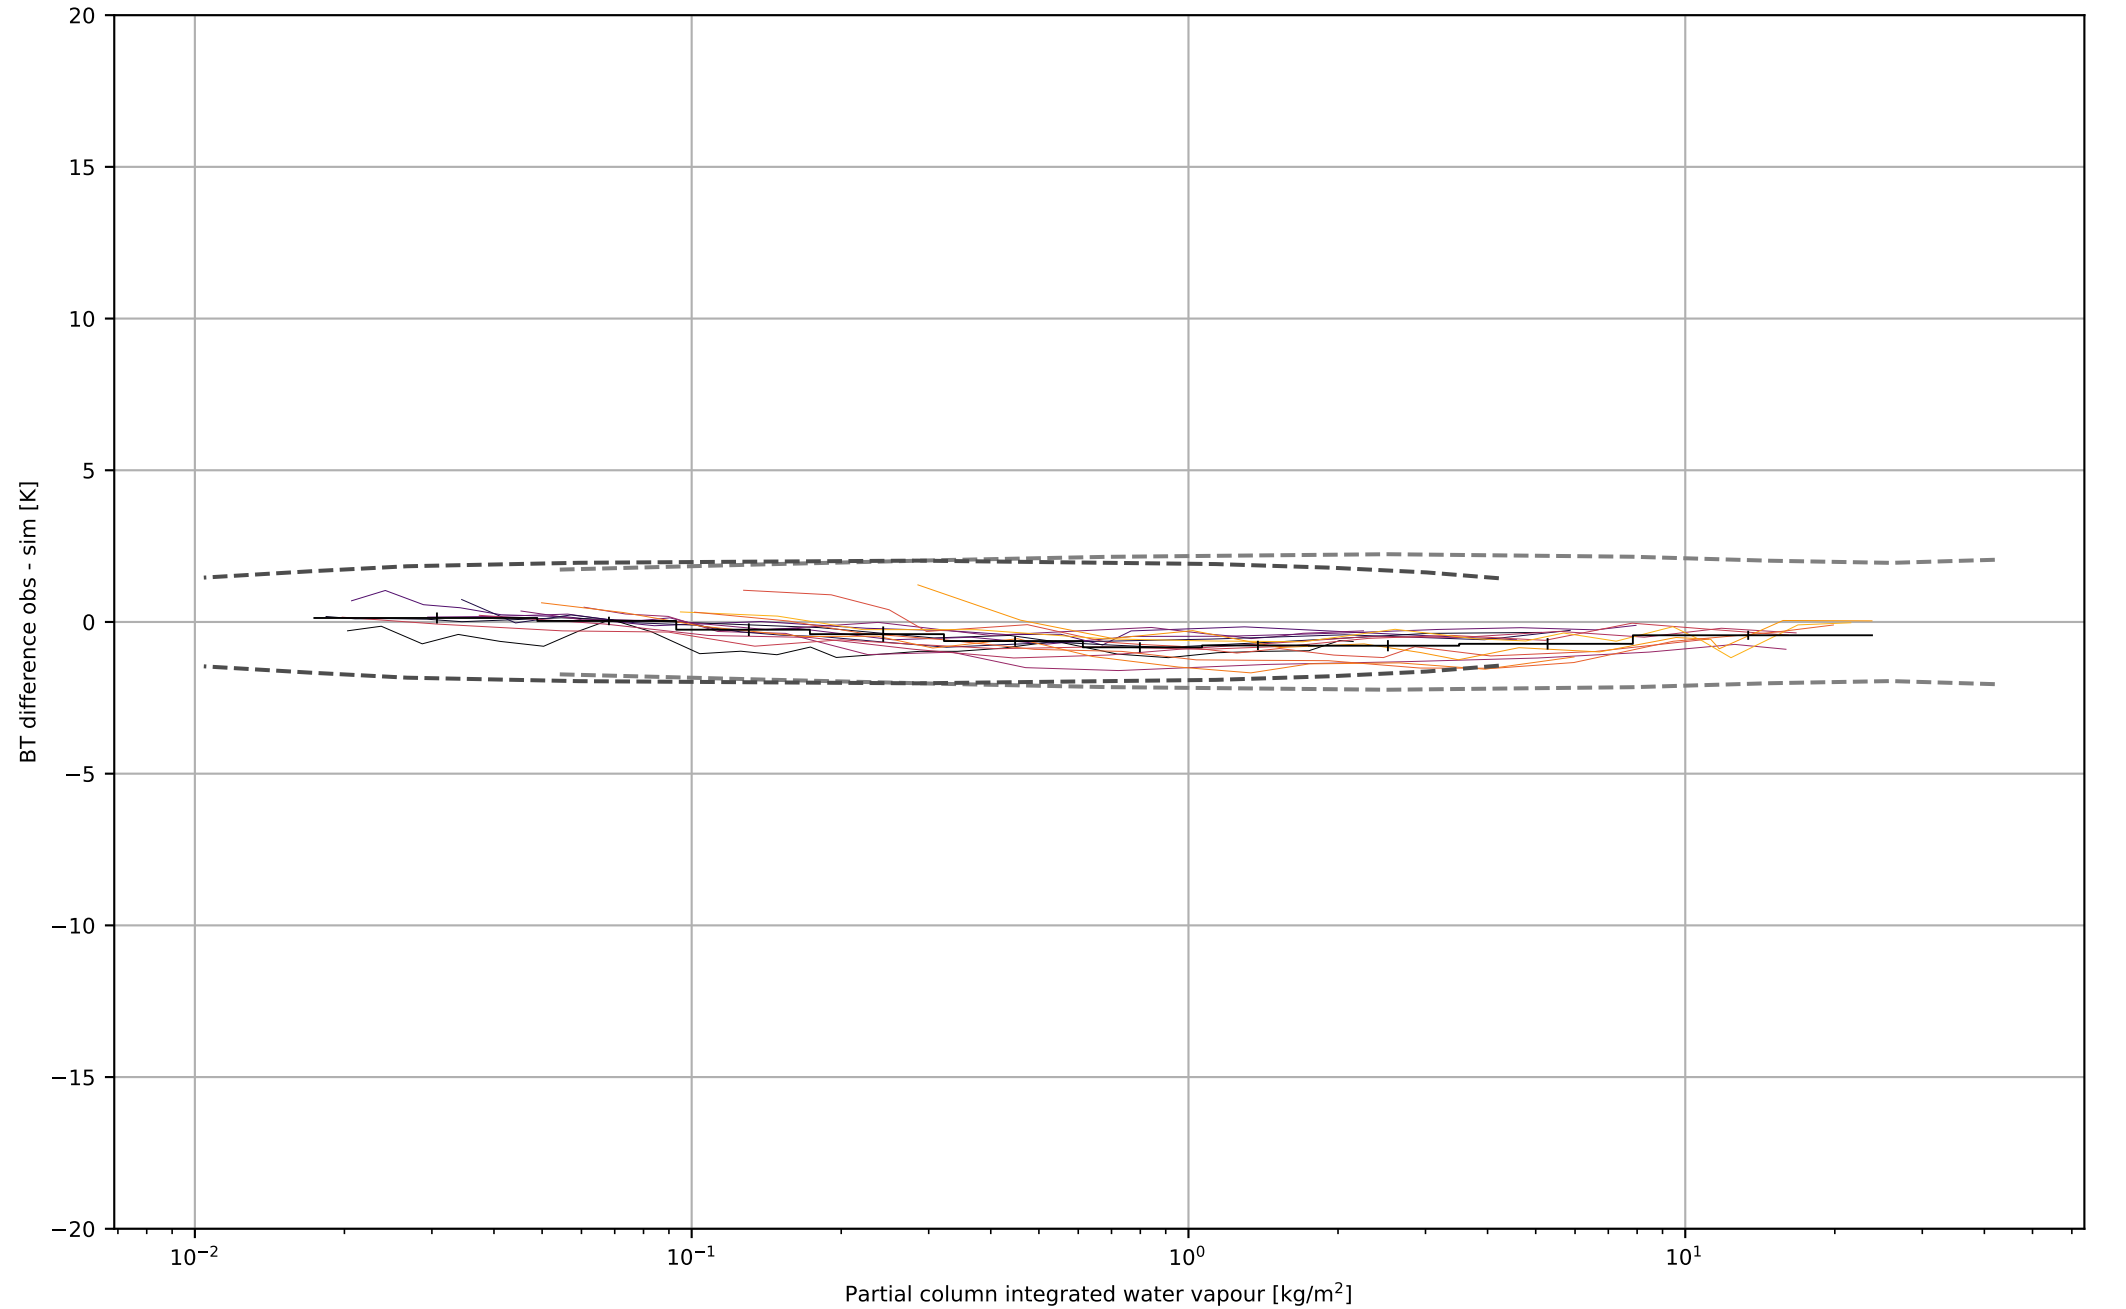





118±1.5 GHz

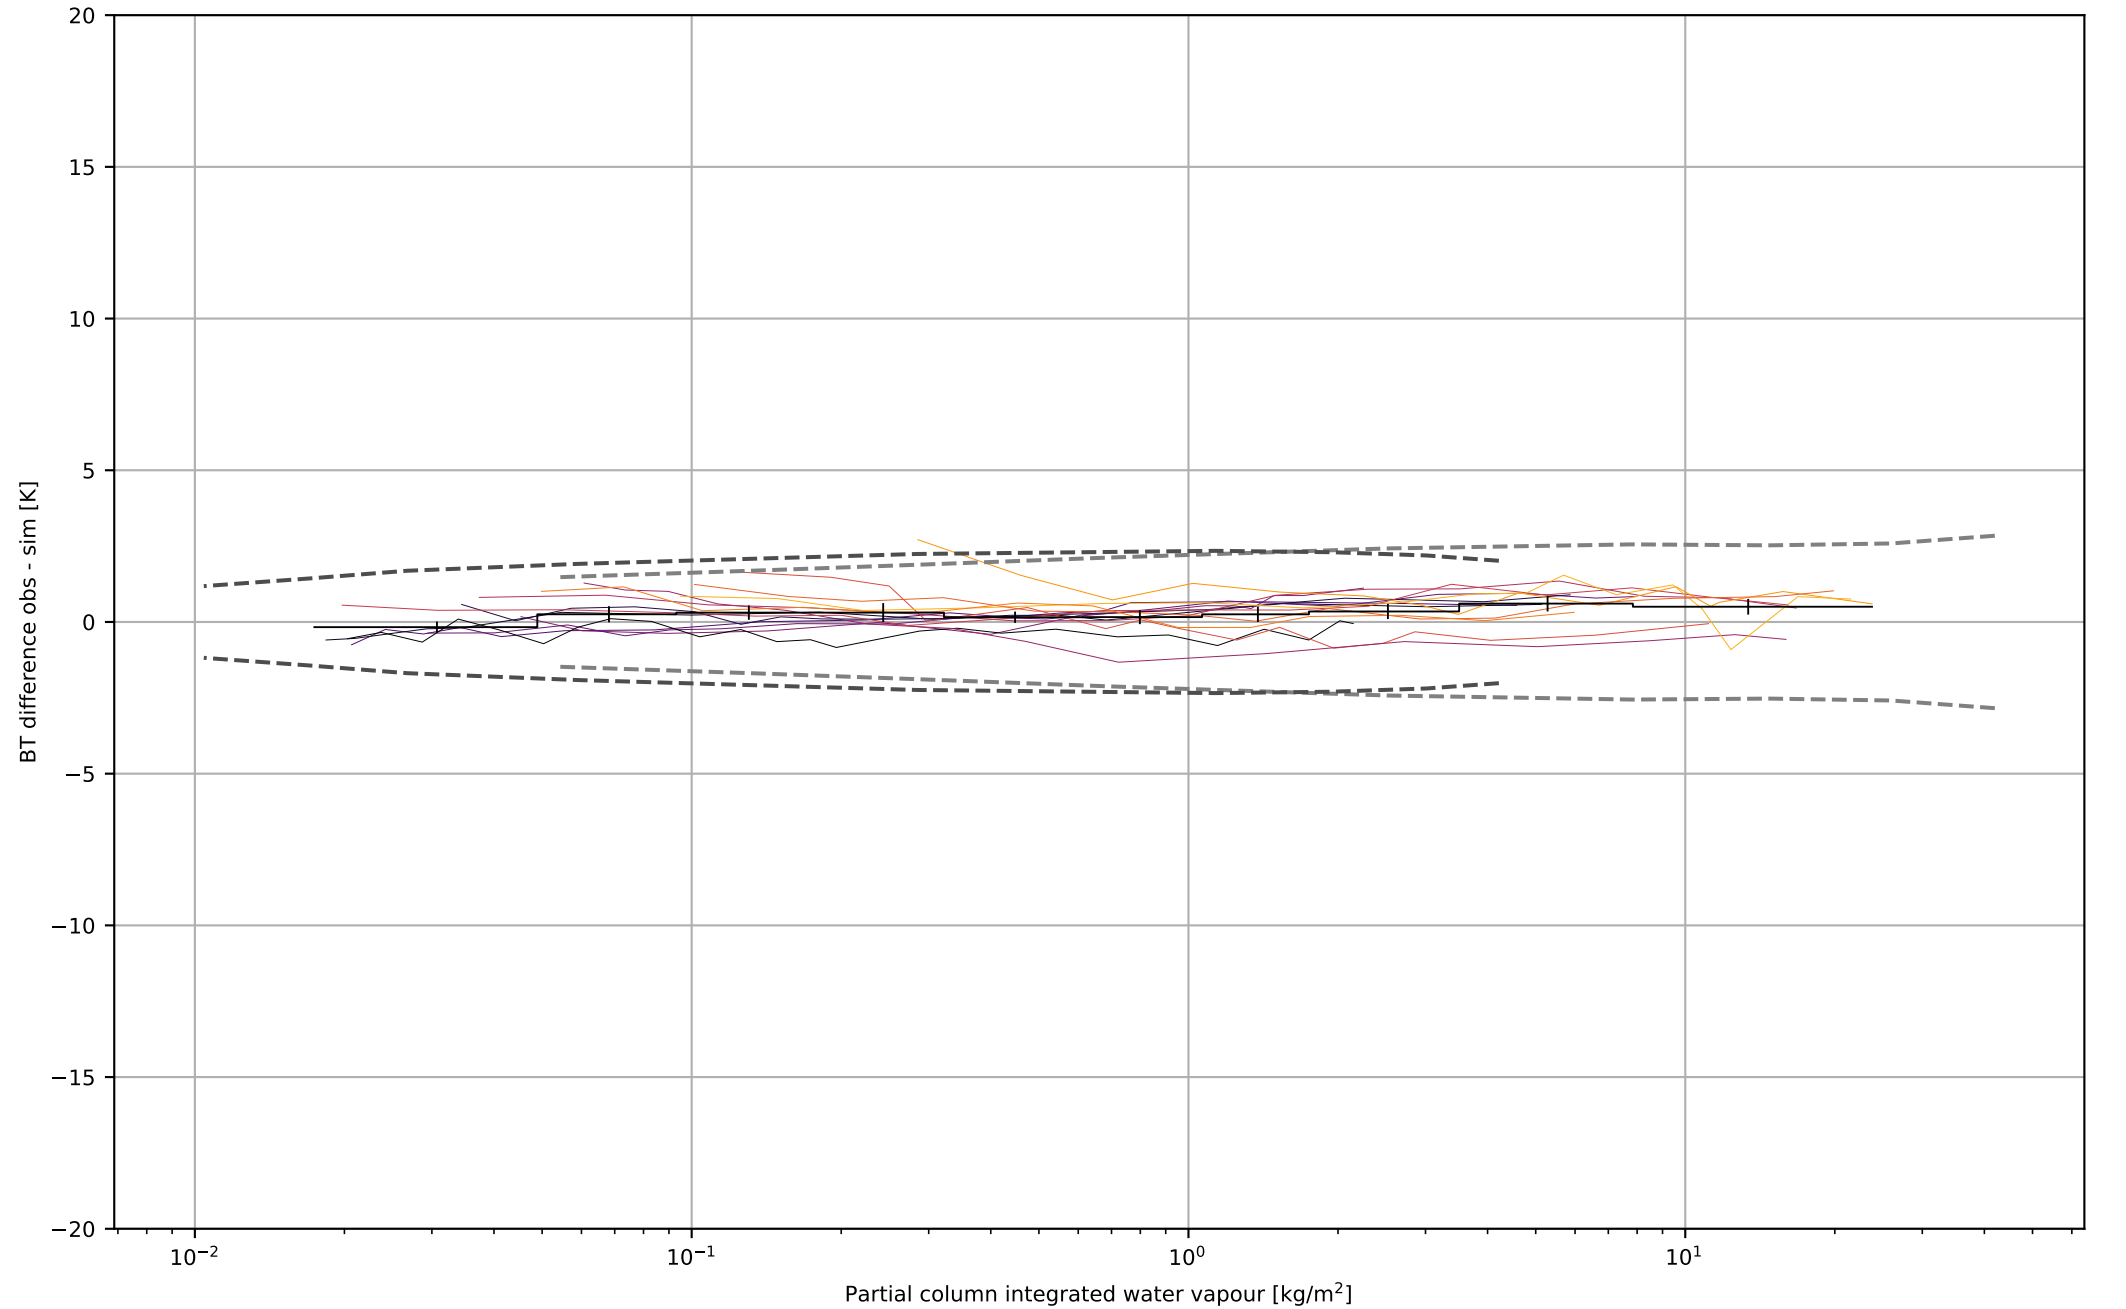





118±2.1 GHz

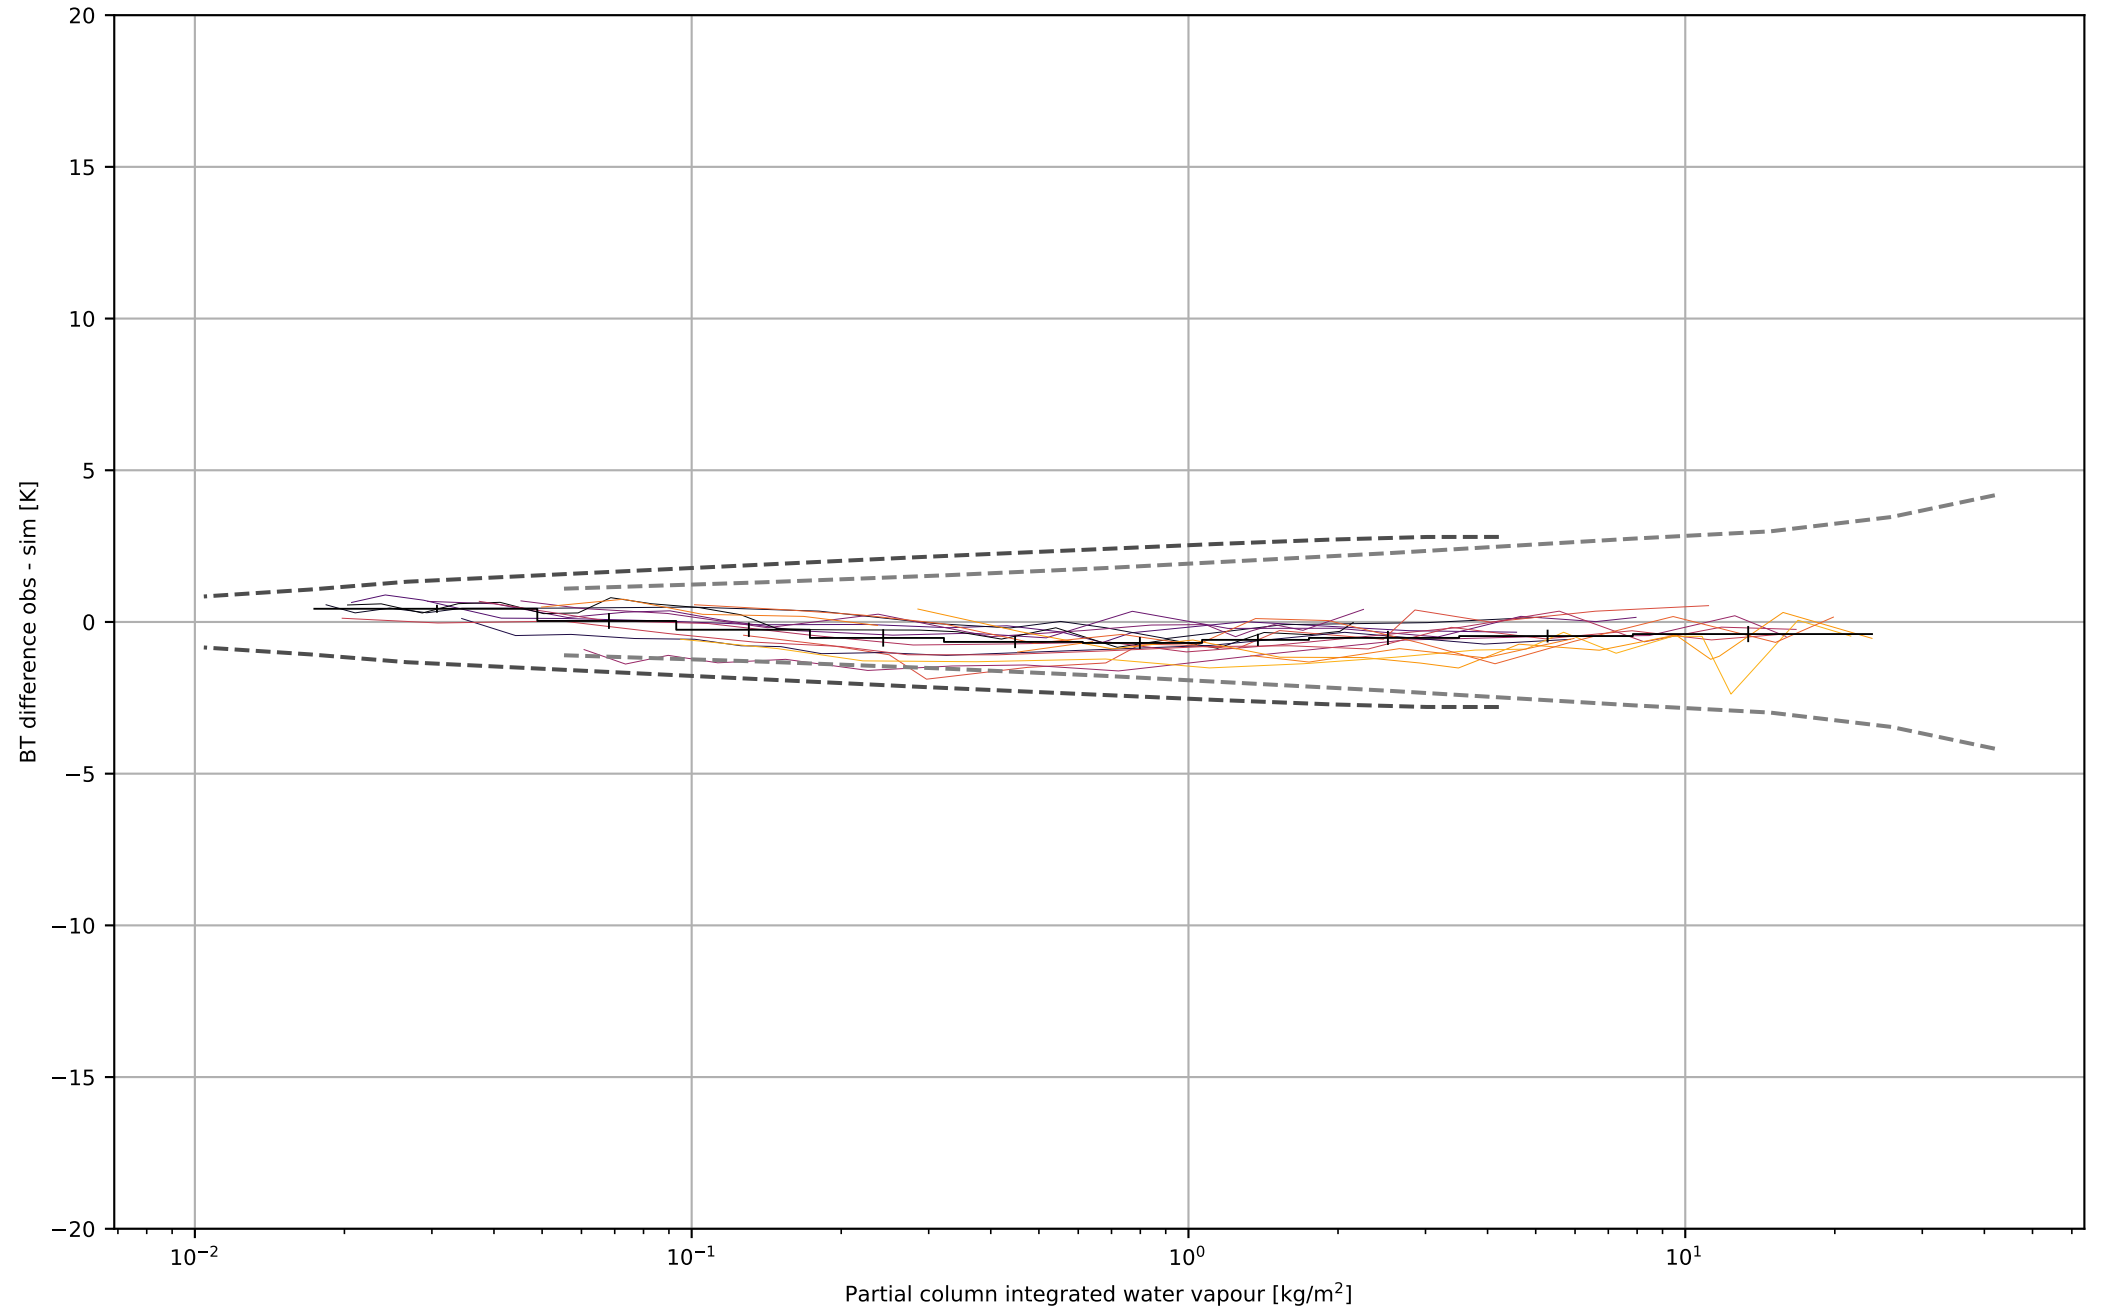





118±3.0 GHz

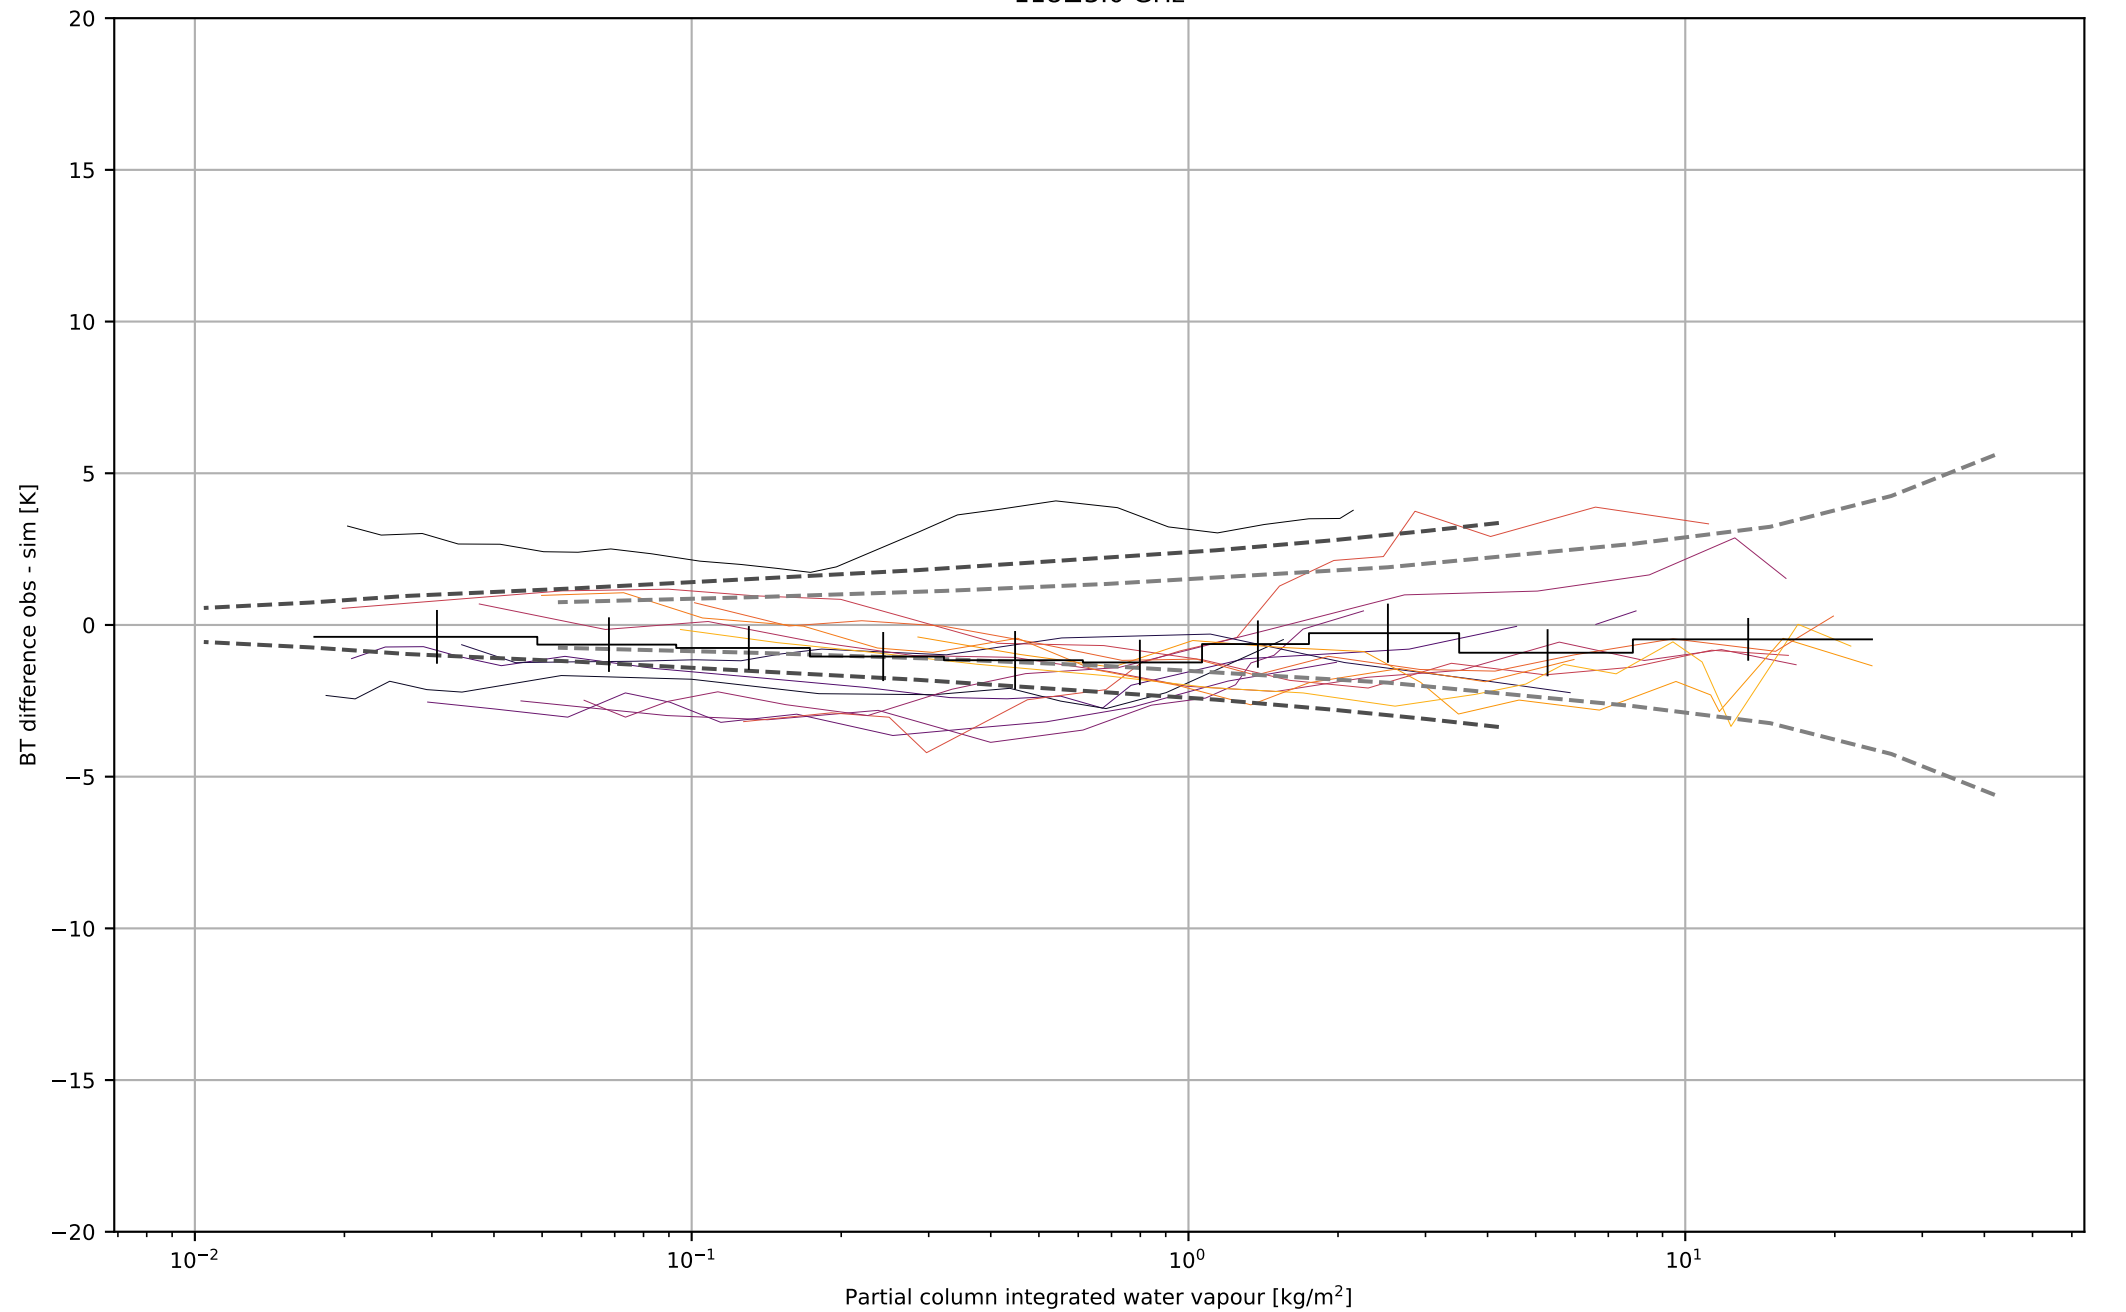





118±5.0 GHz

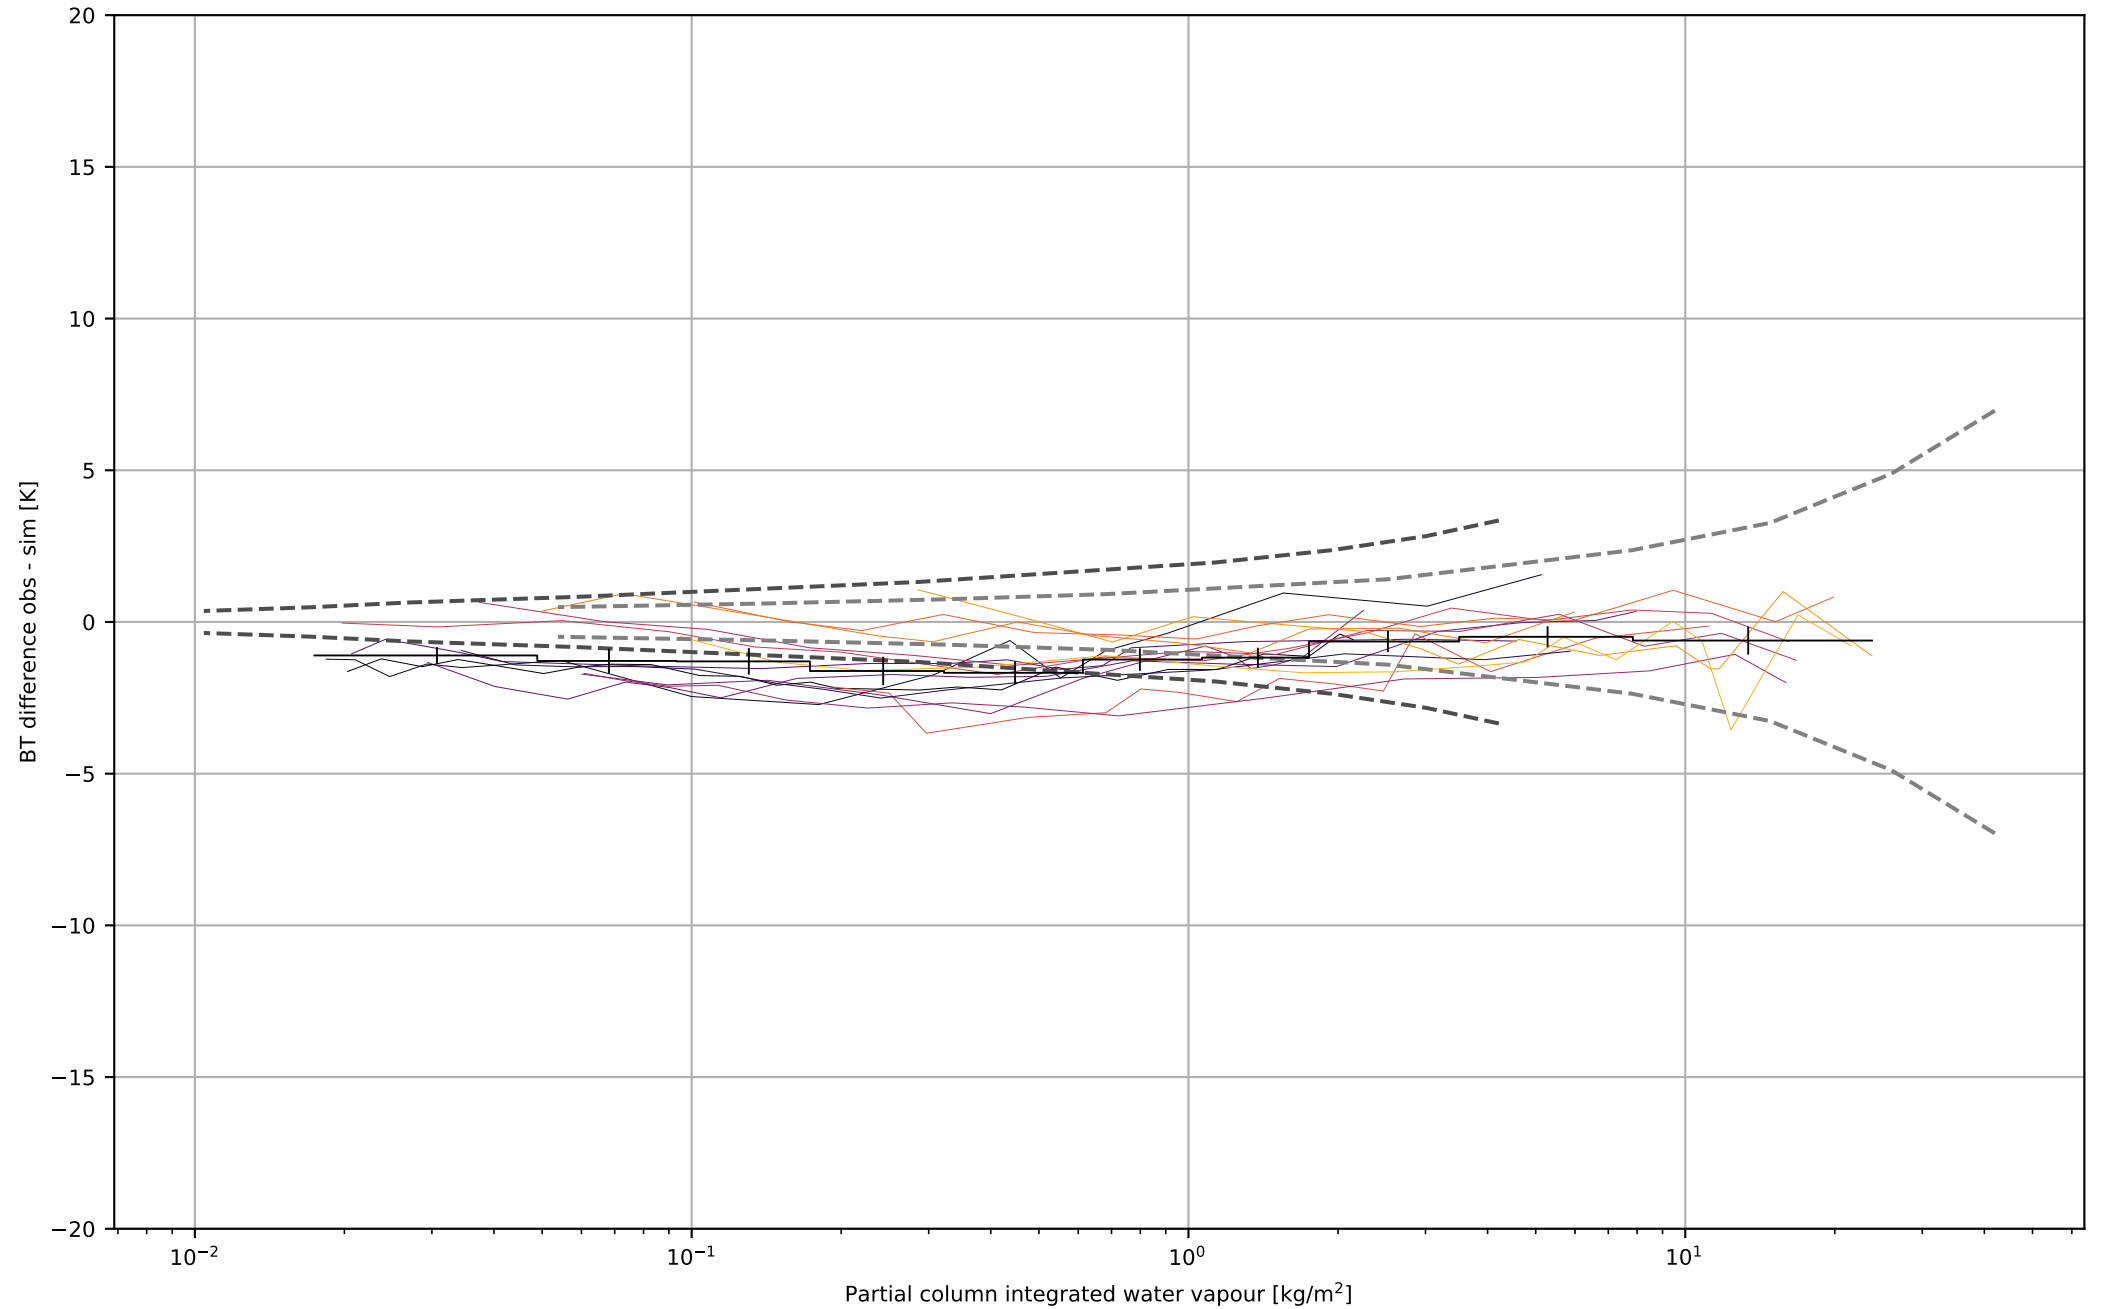





157 GHz

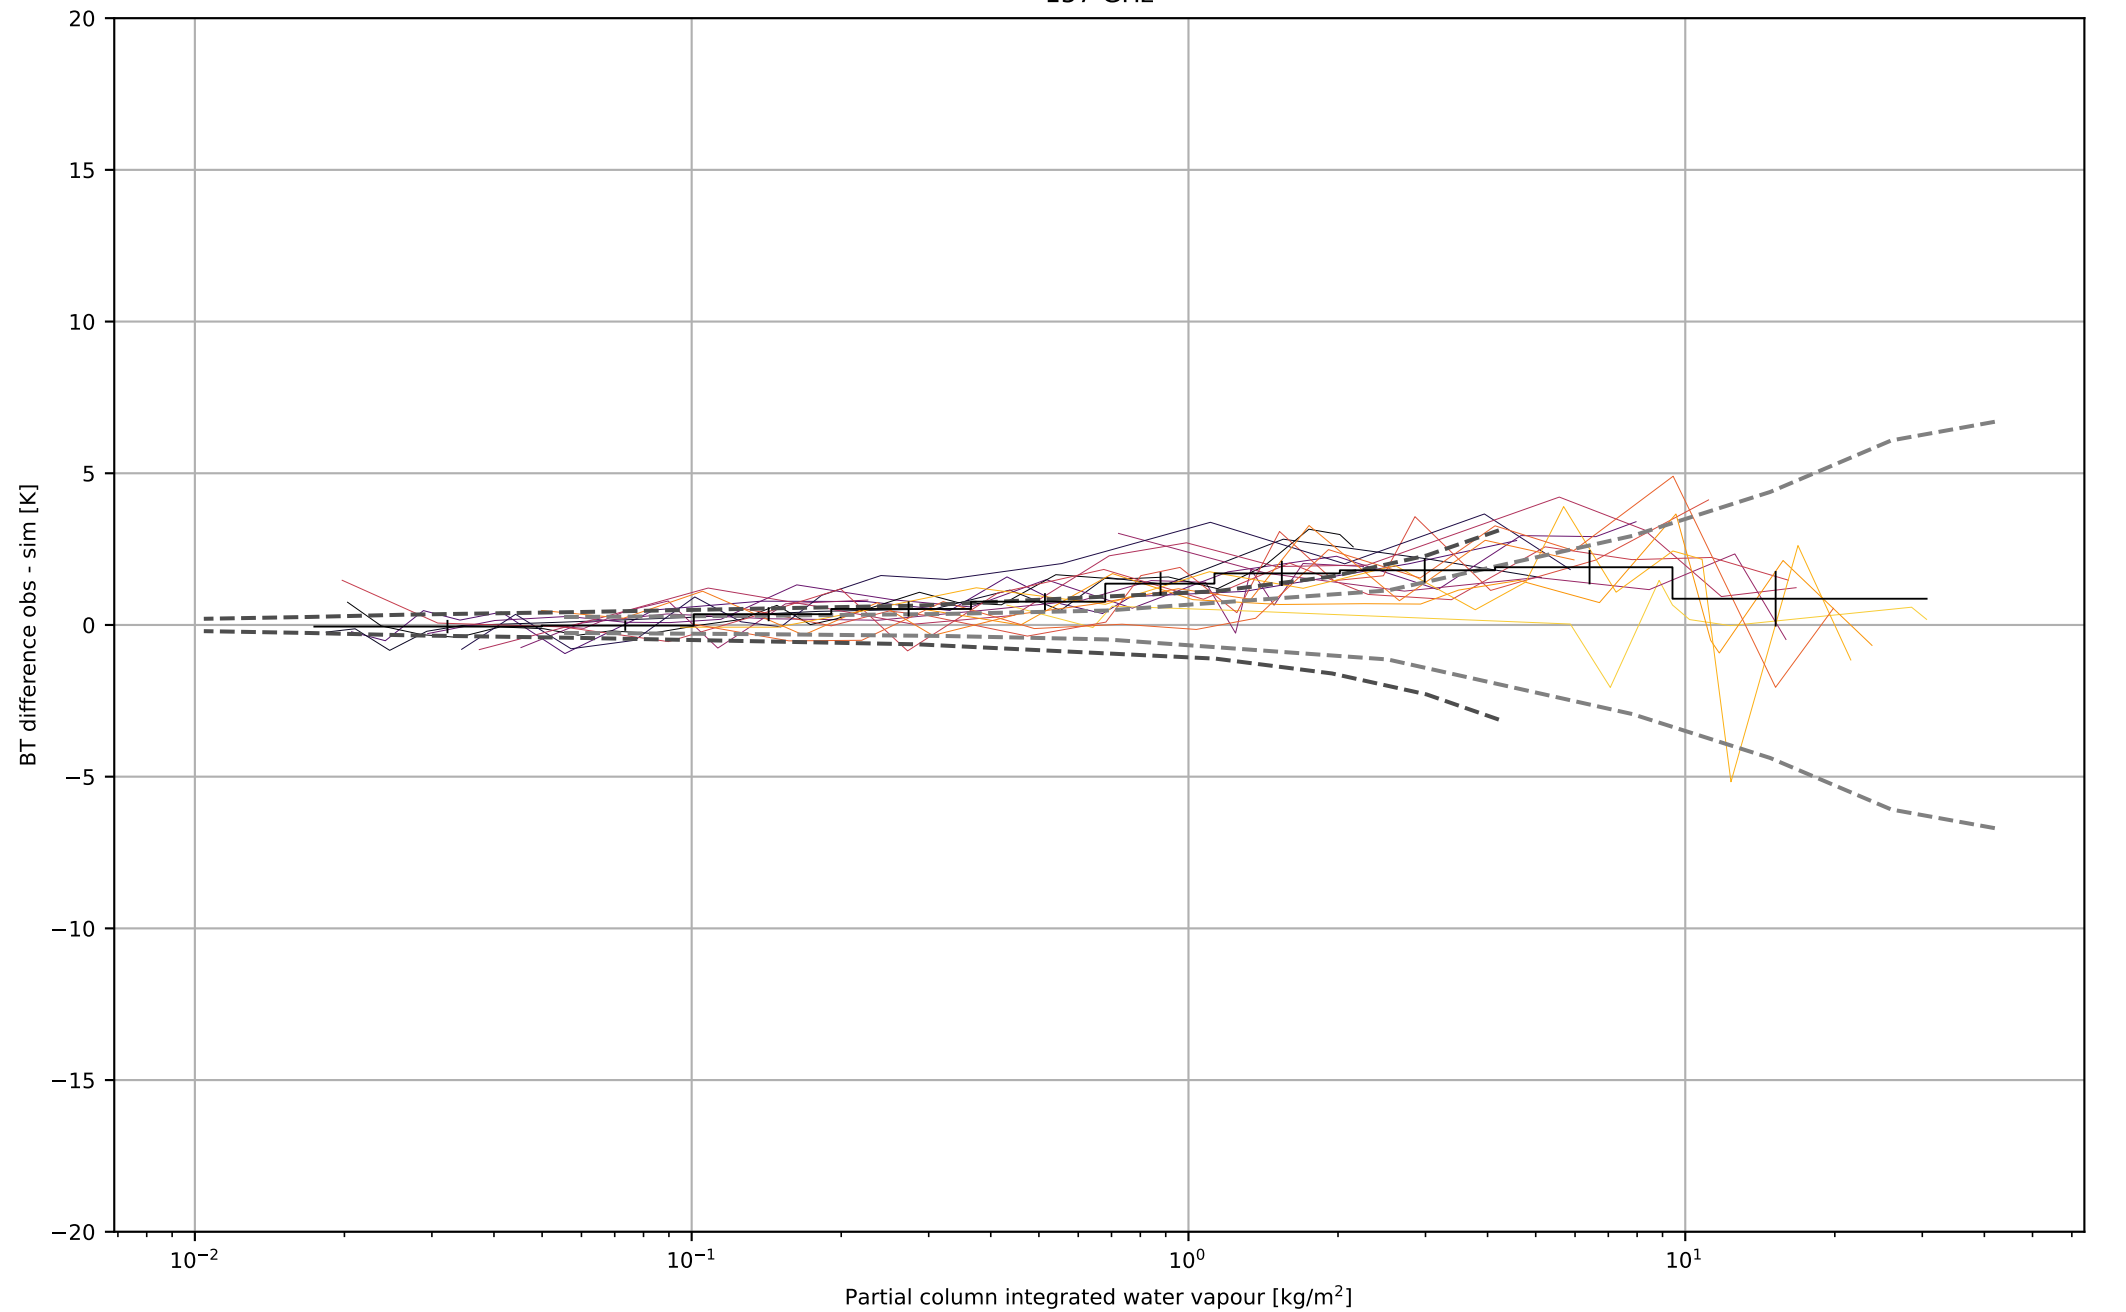





183±1 GHz

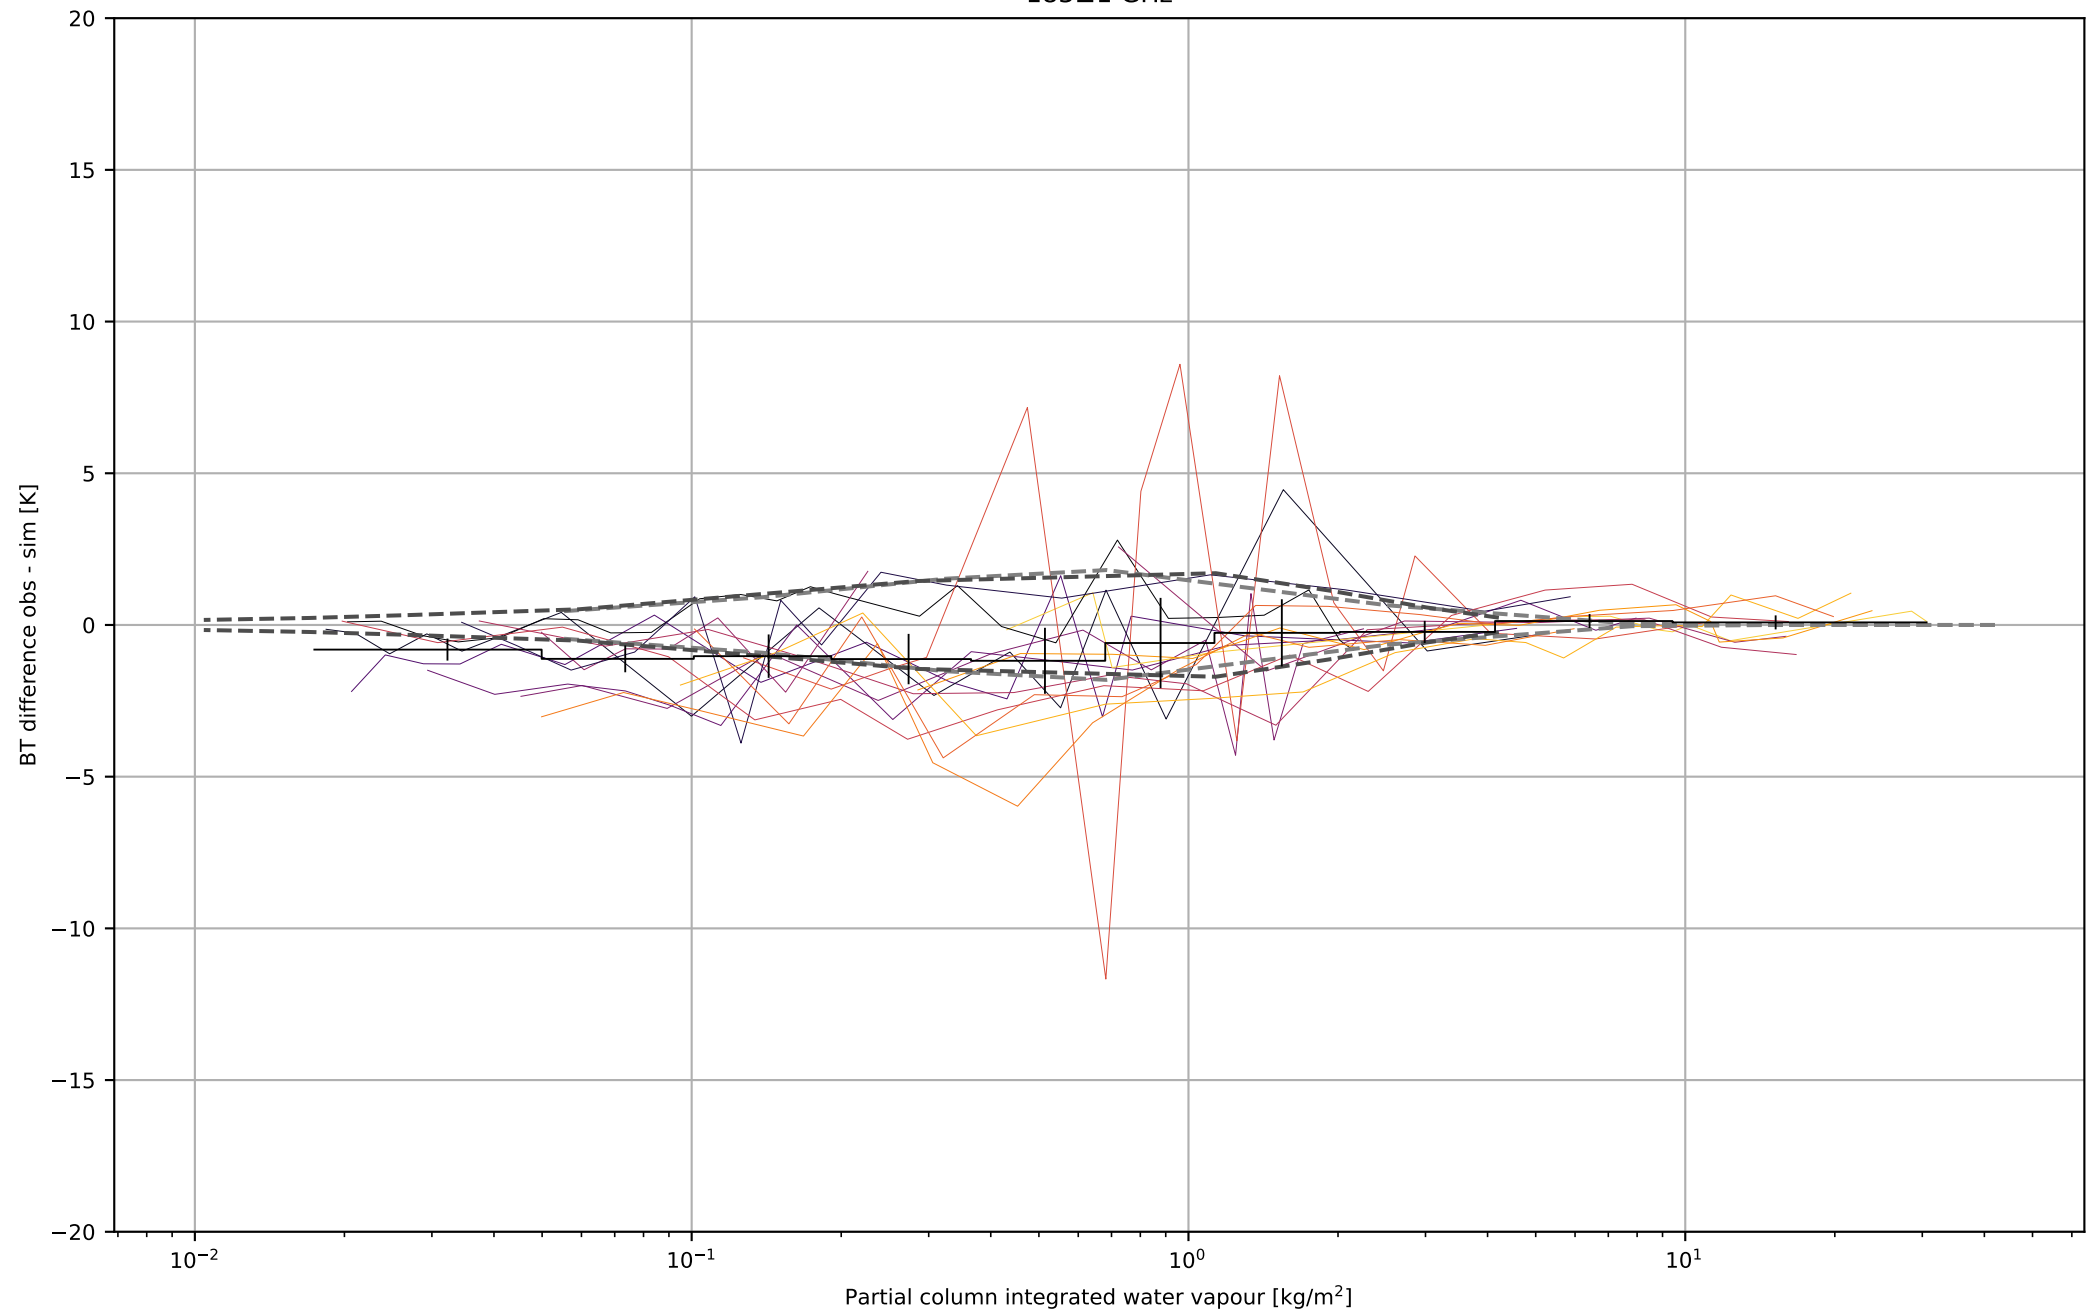





183±3 GHz

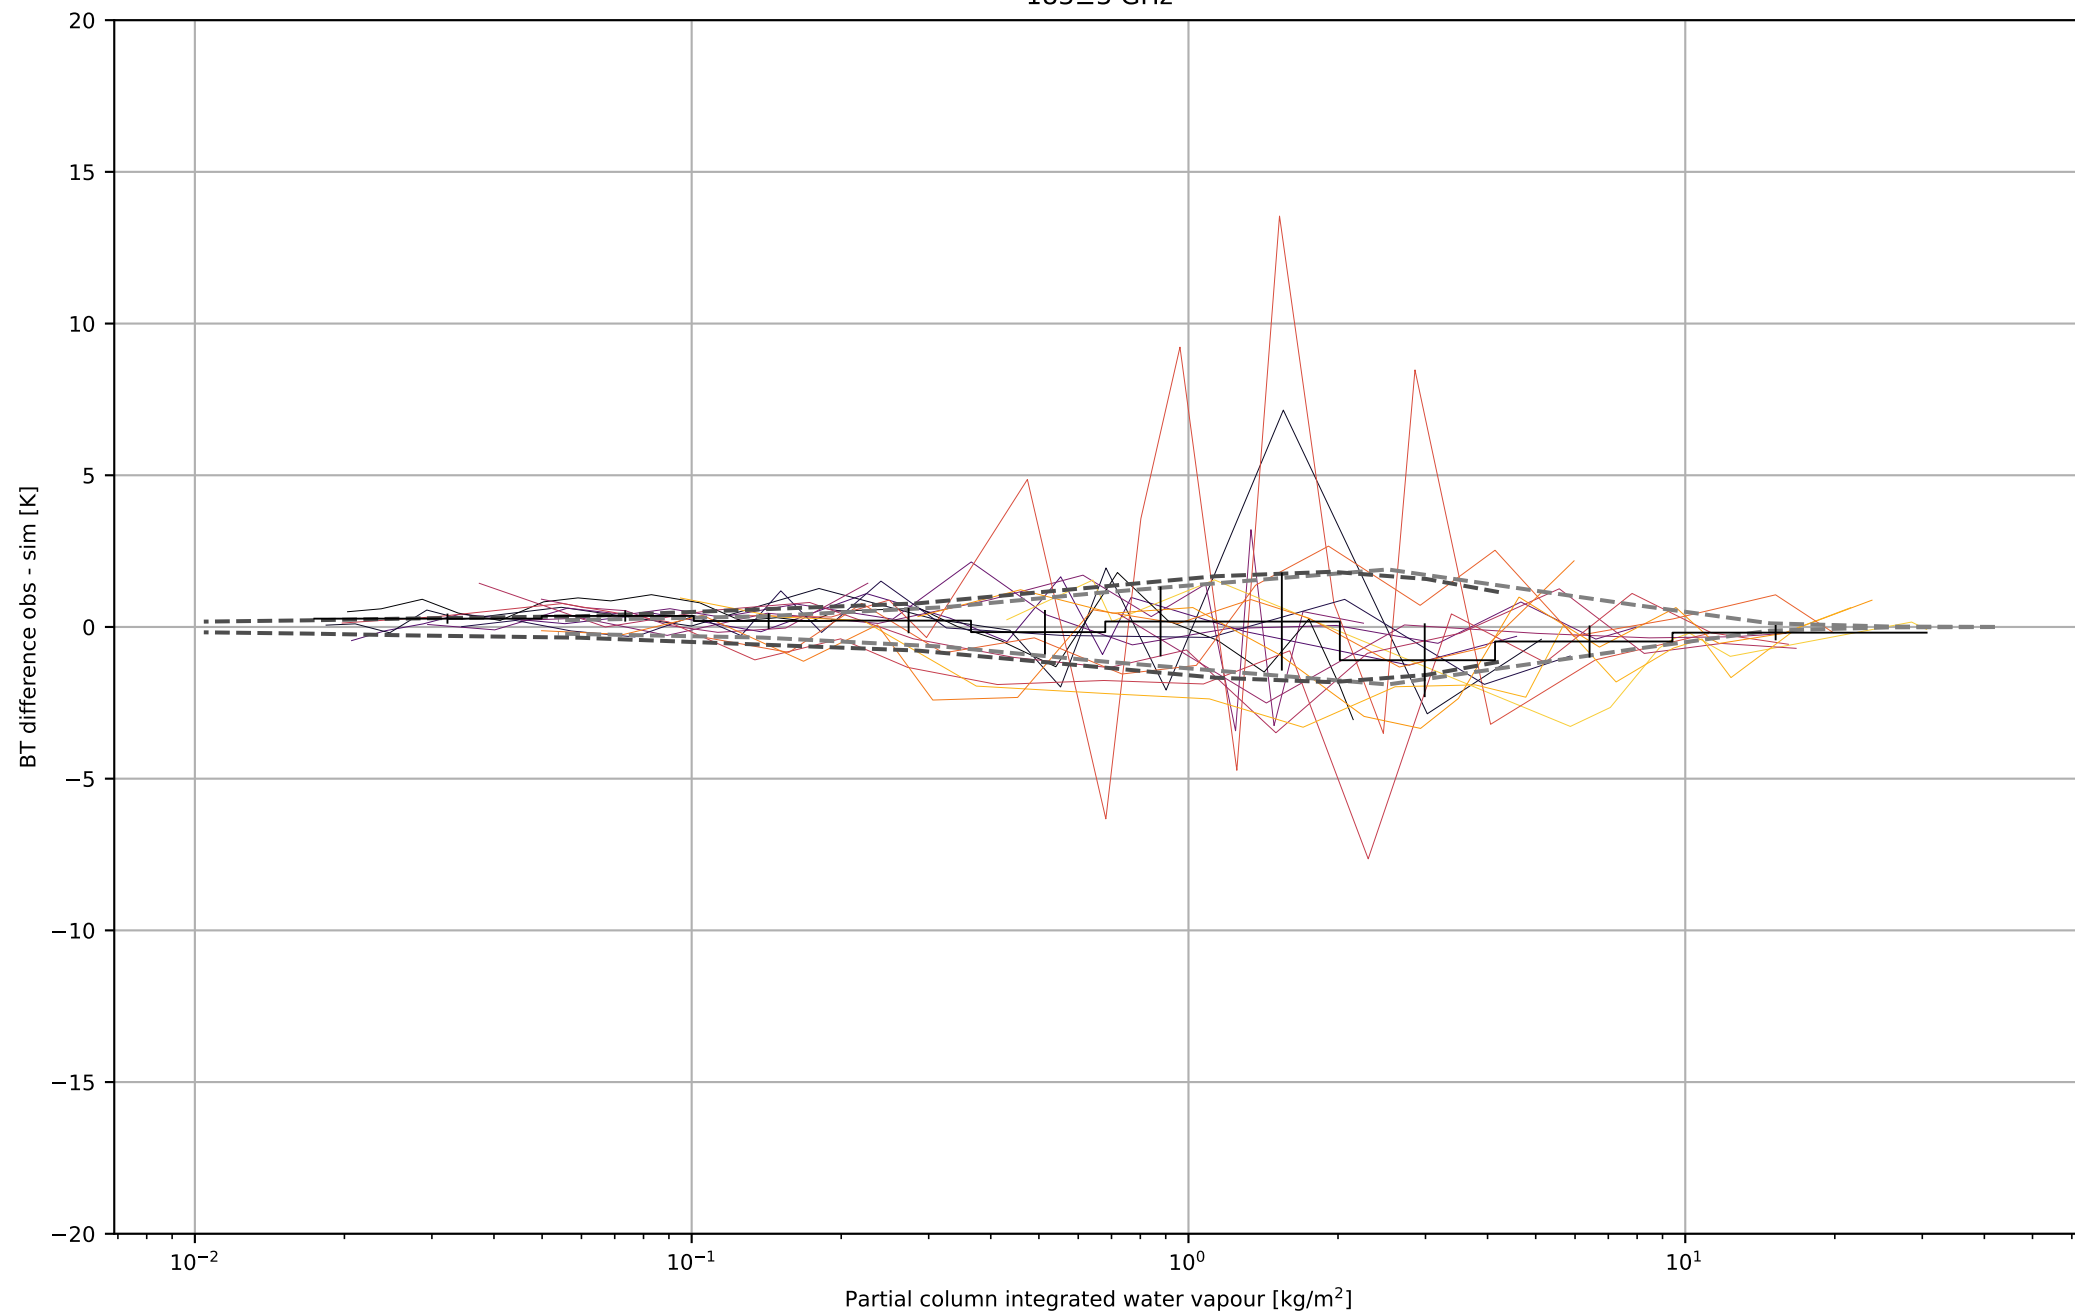





183±7 GHz

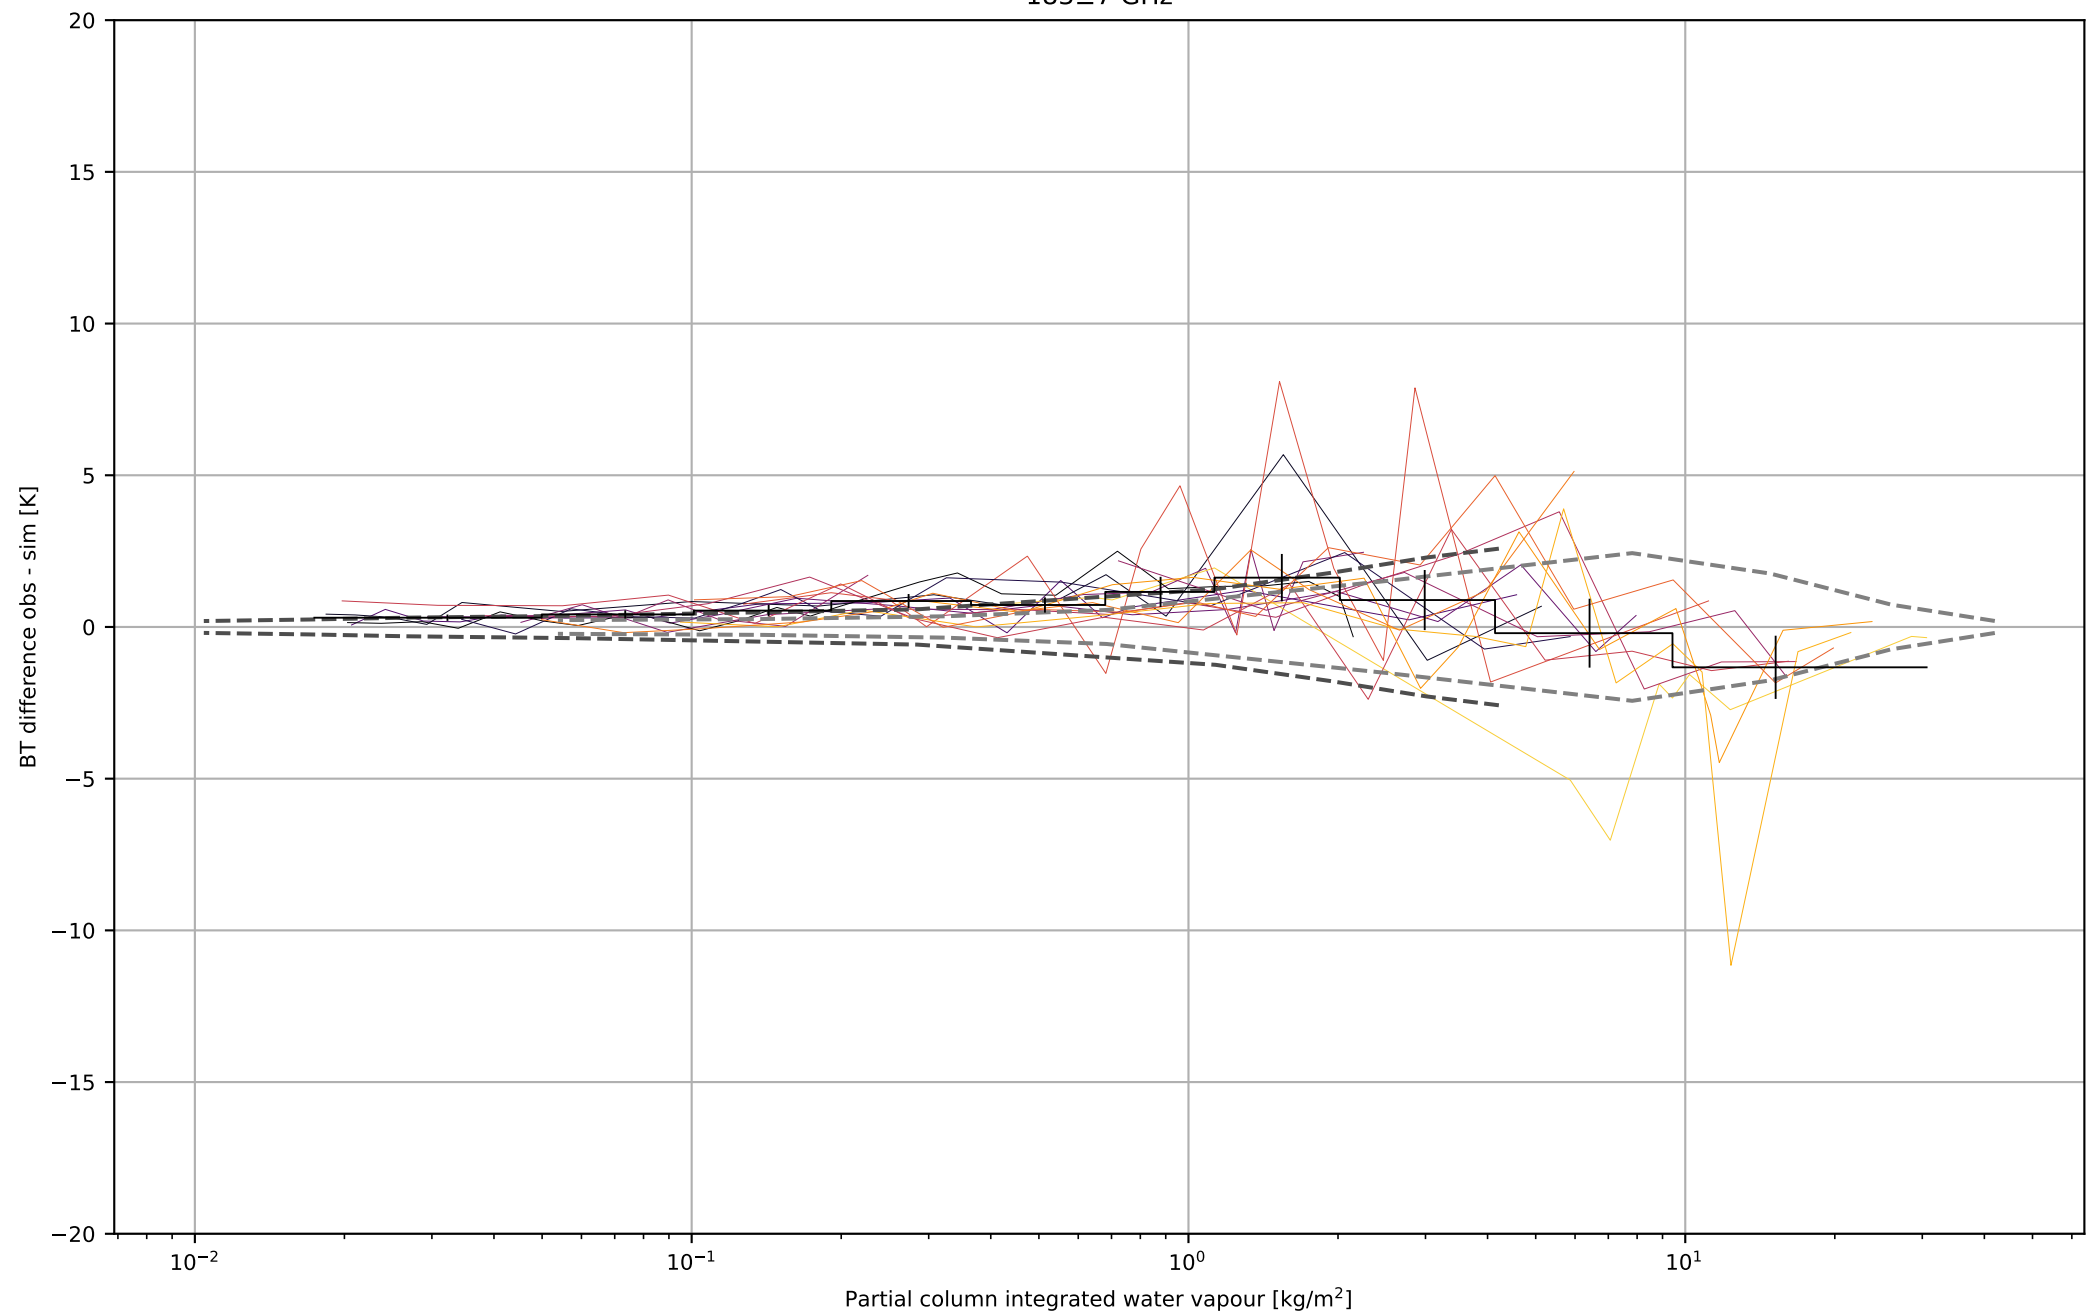





243 GHz

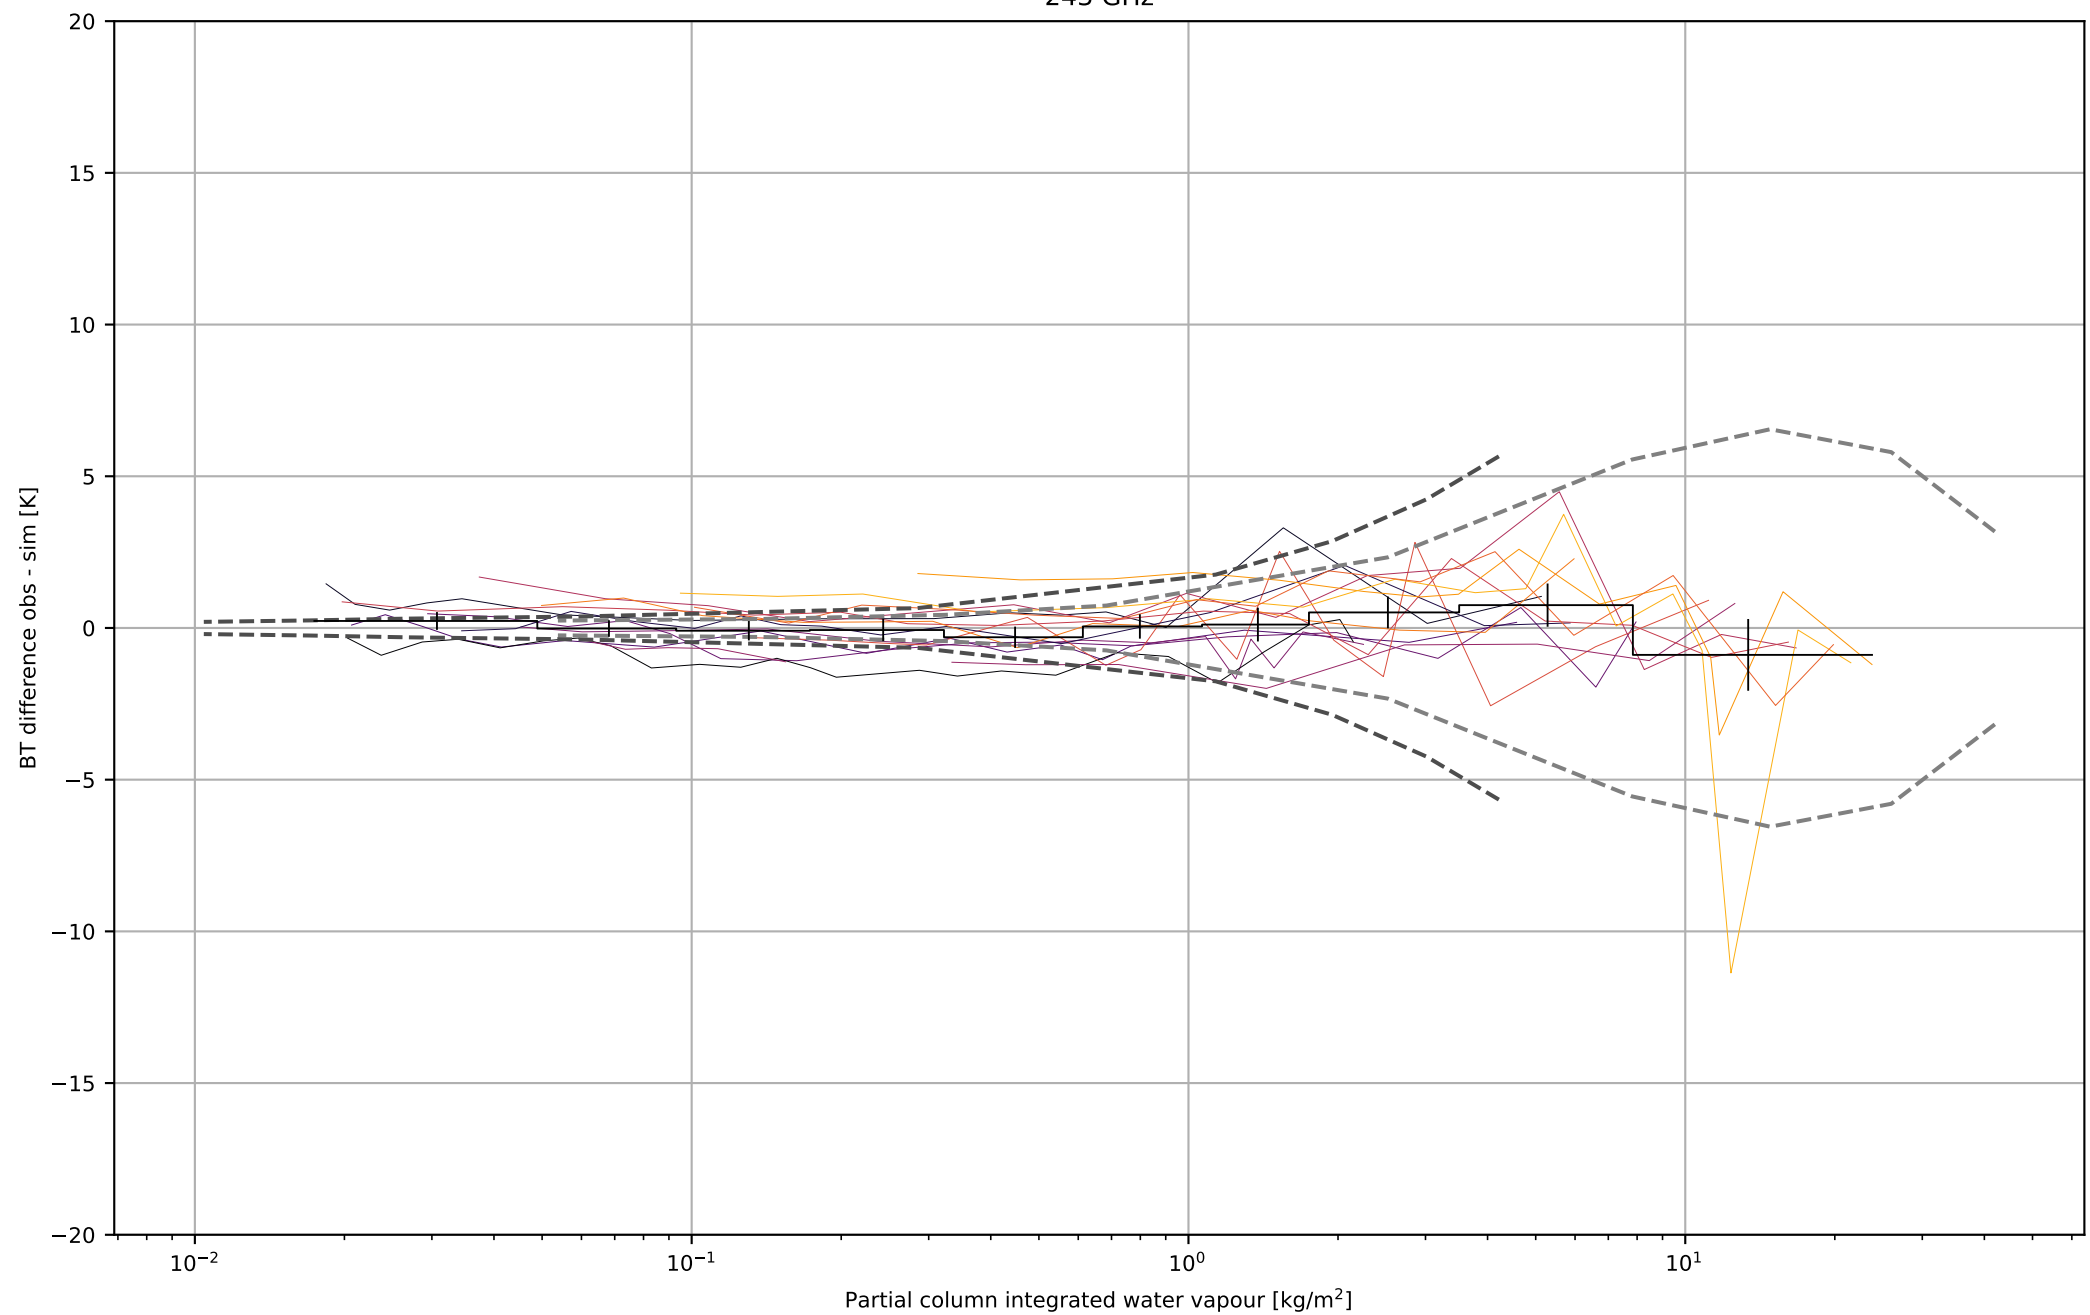





325±1.5 GHz

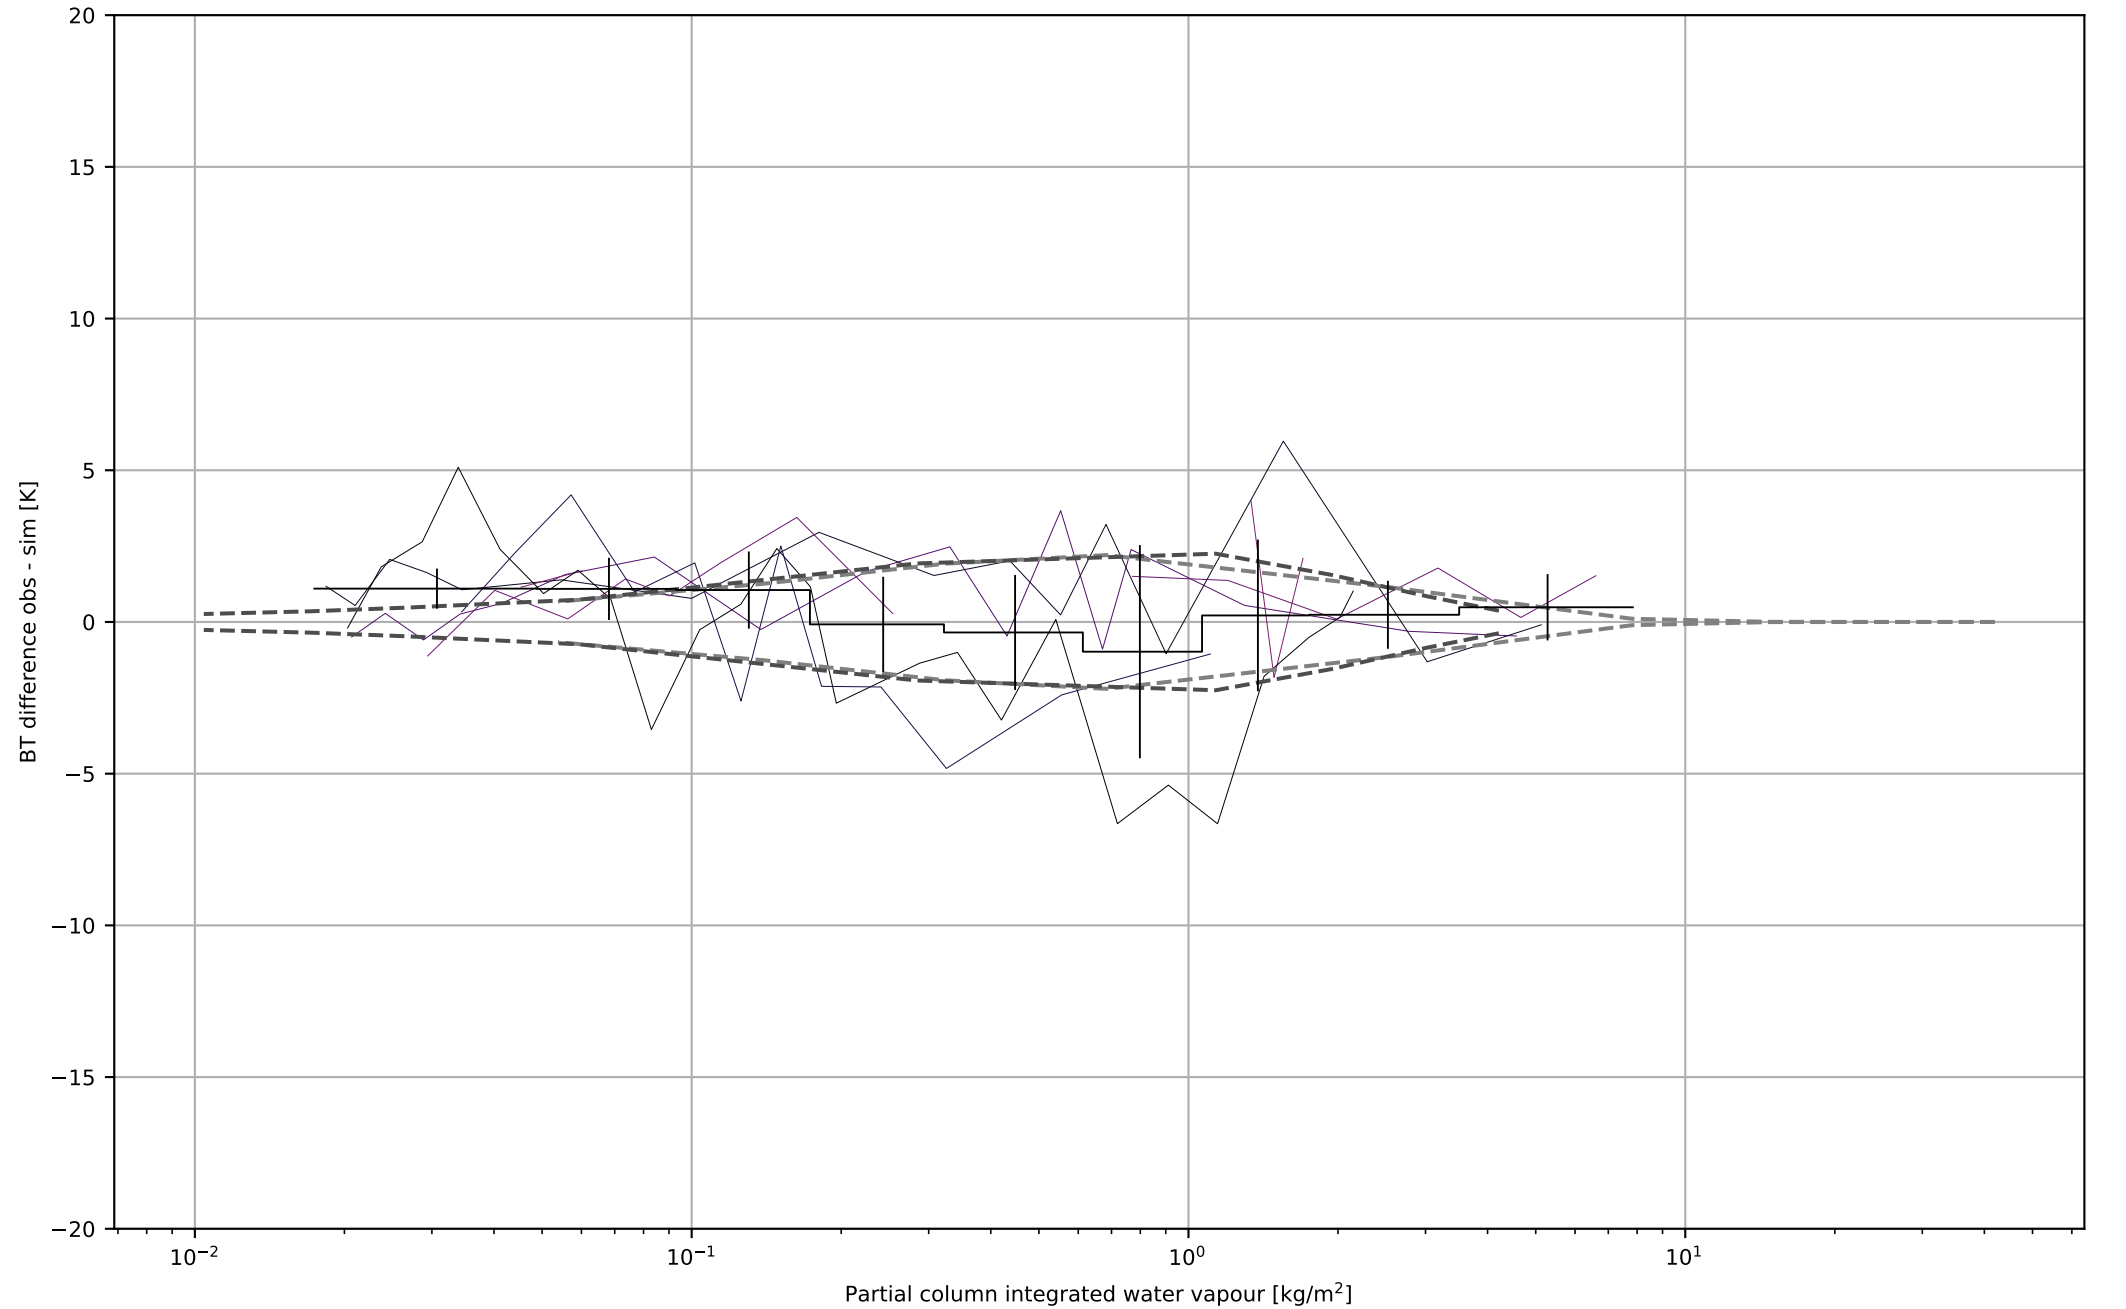





325±3.5 GHz

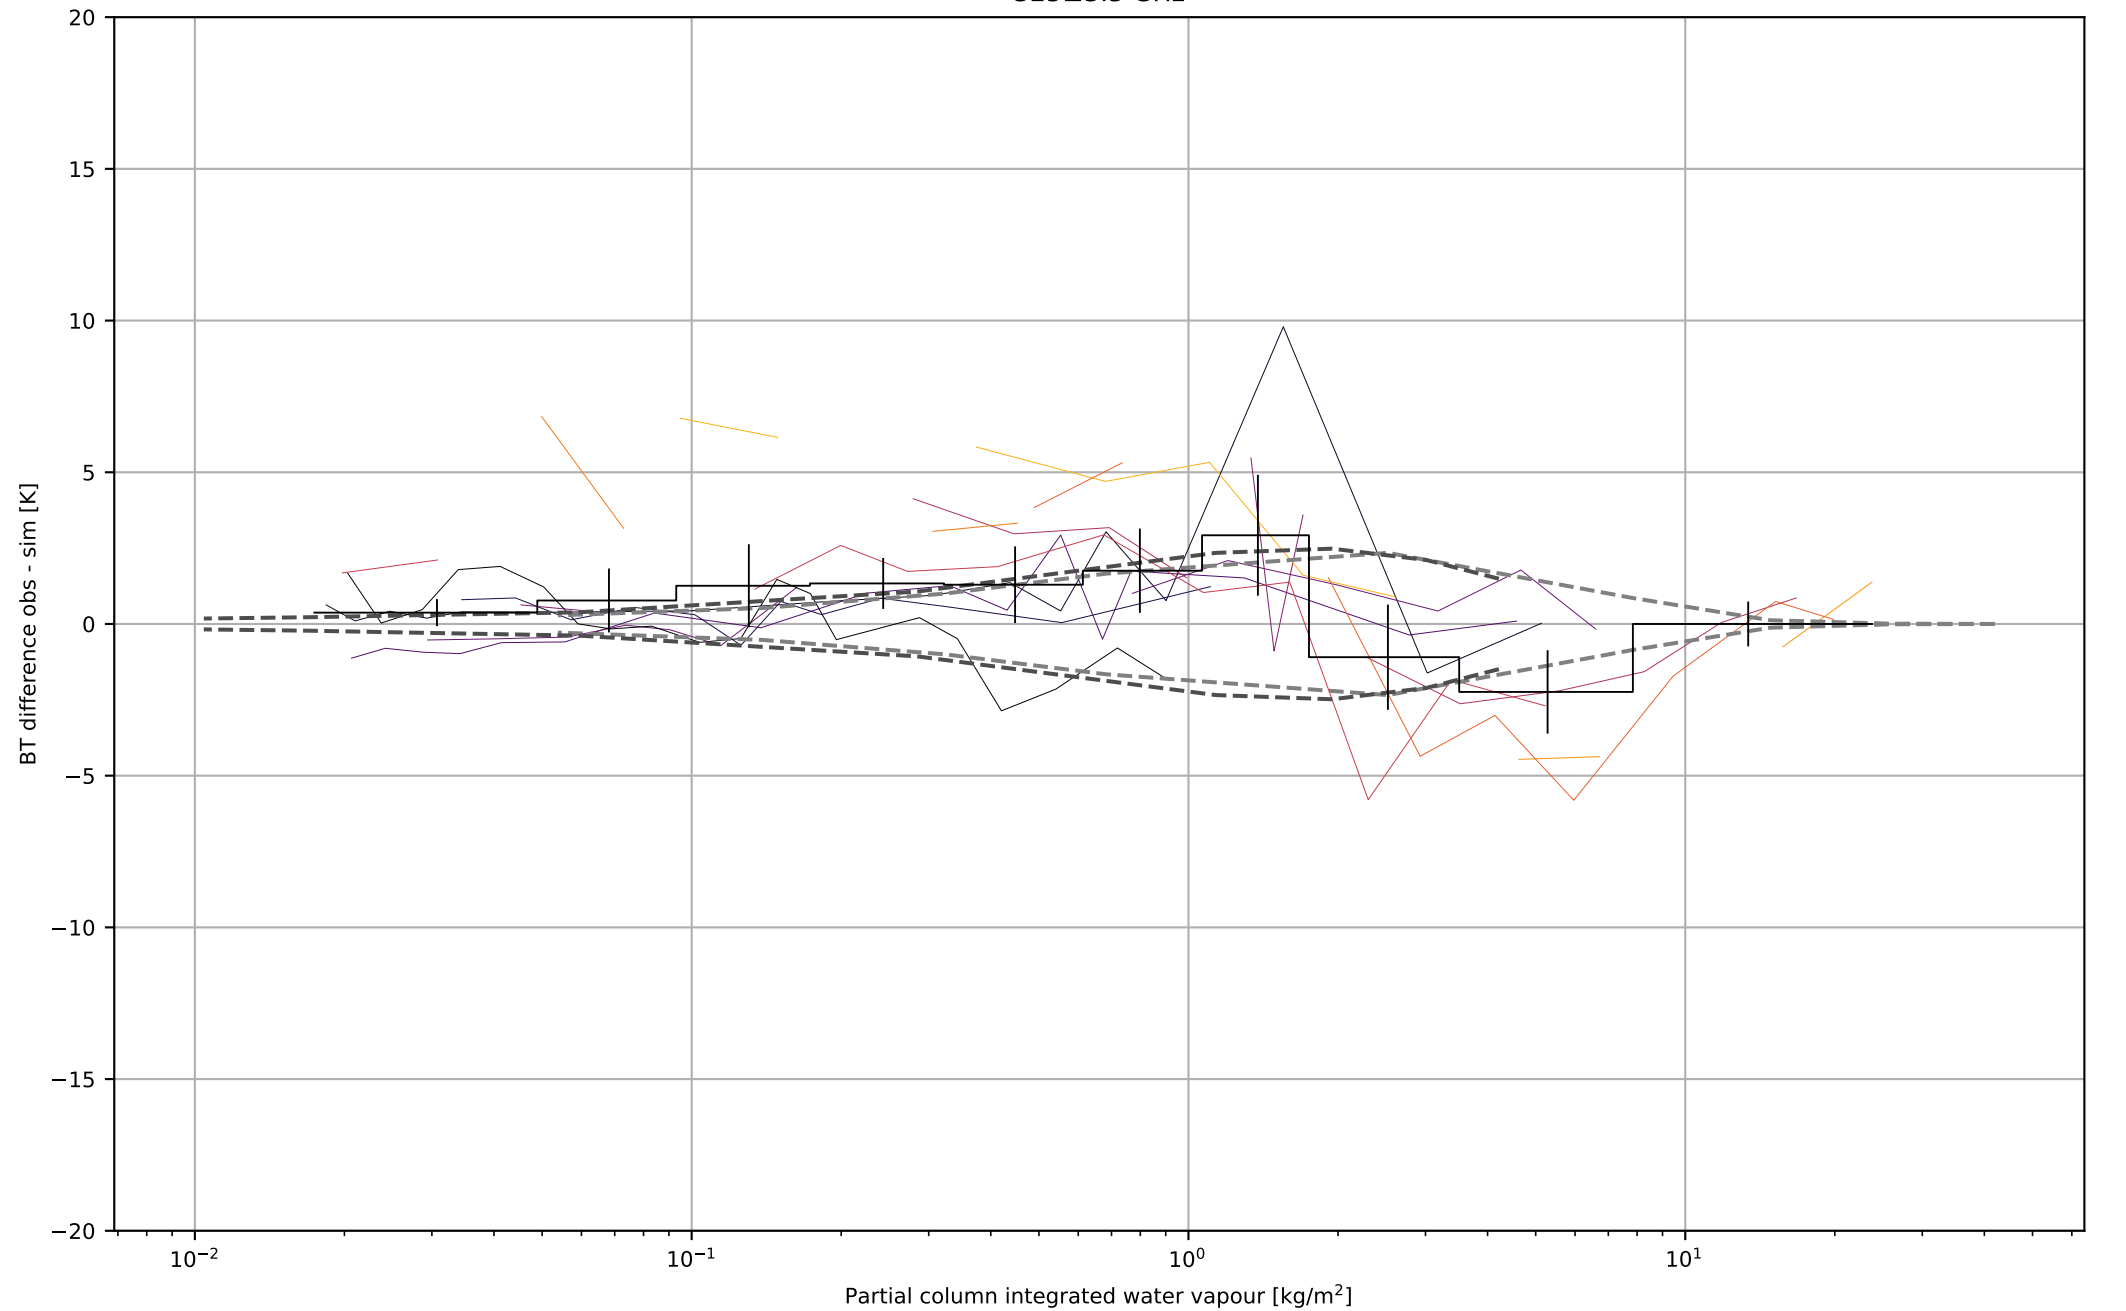





325±9.5 GHz

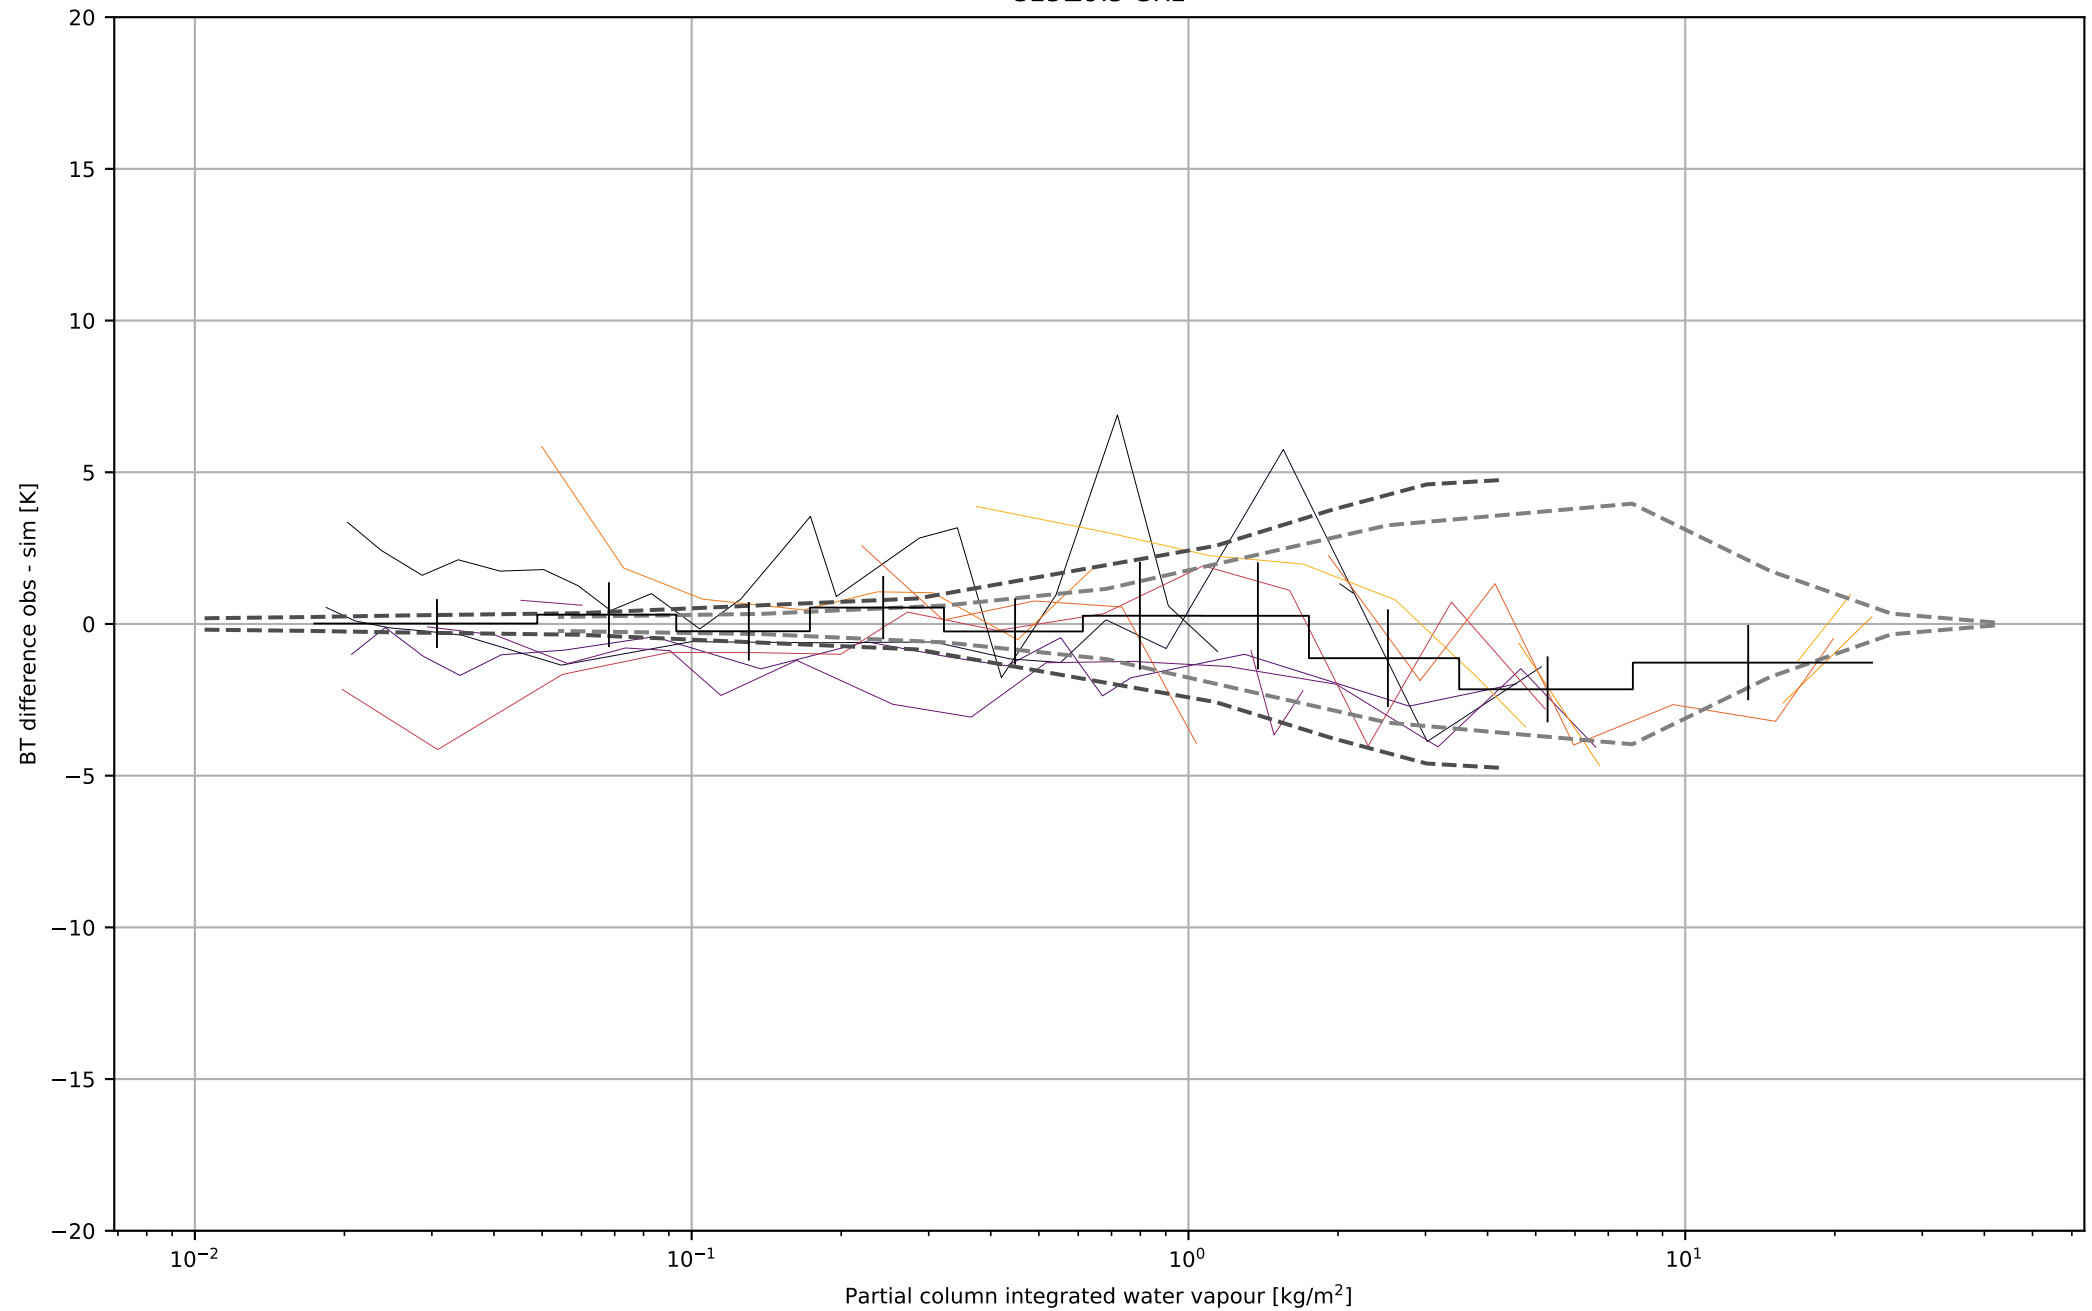





448±1.4 GHz

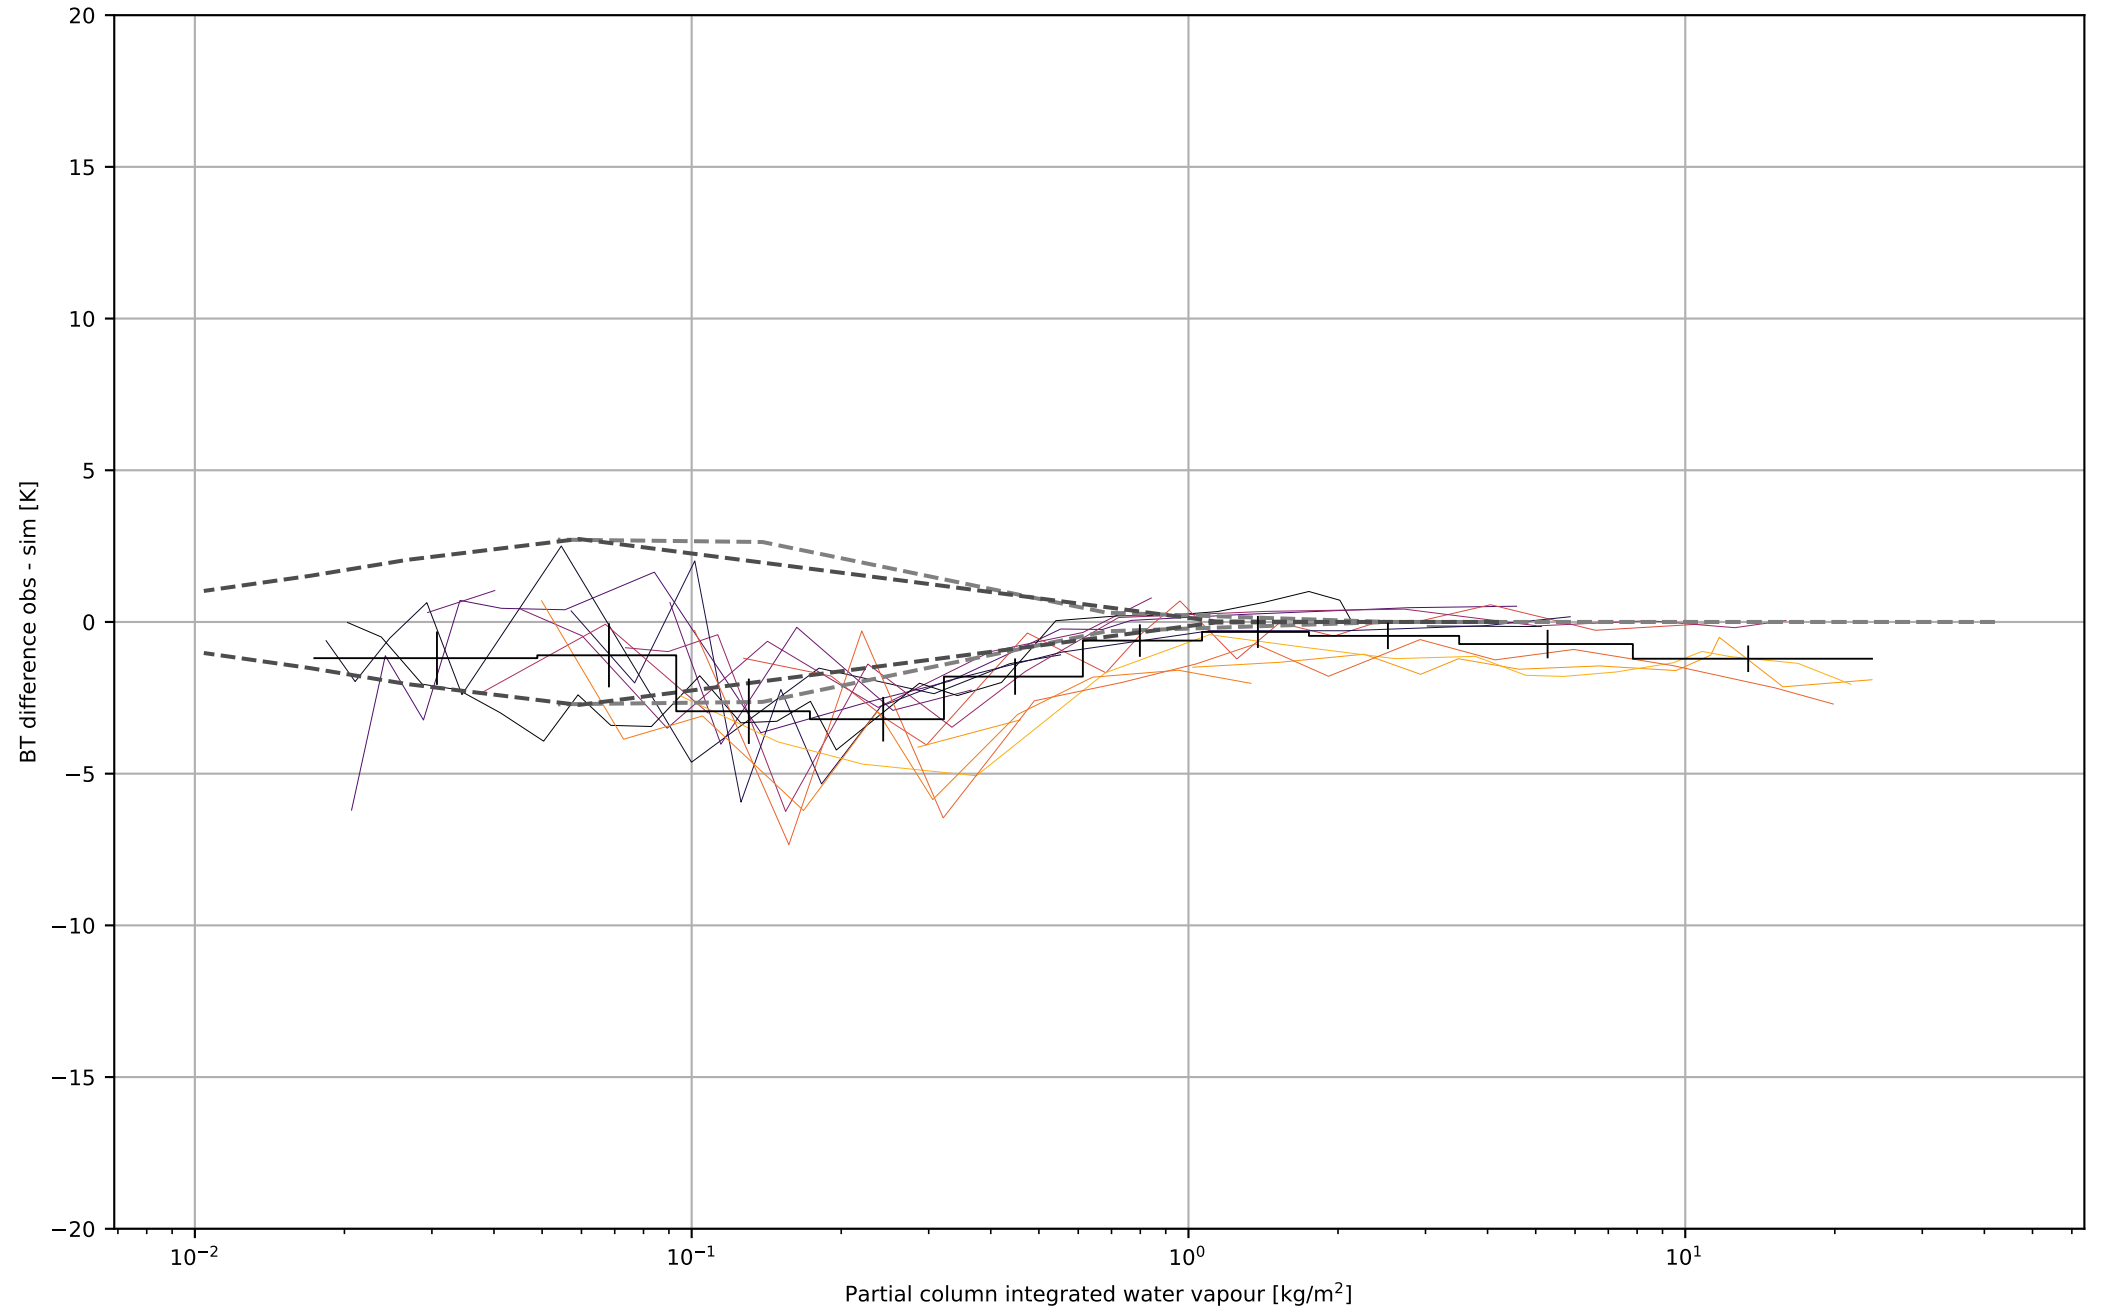





448 $\pm$ 3.0 GHz

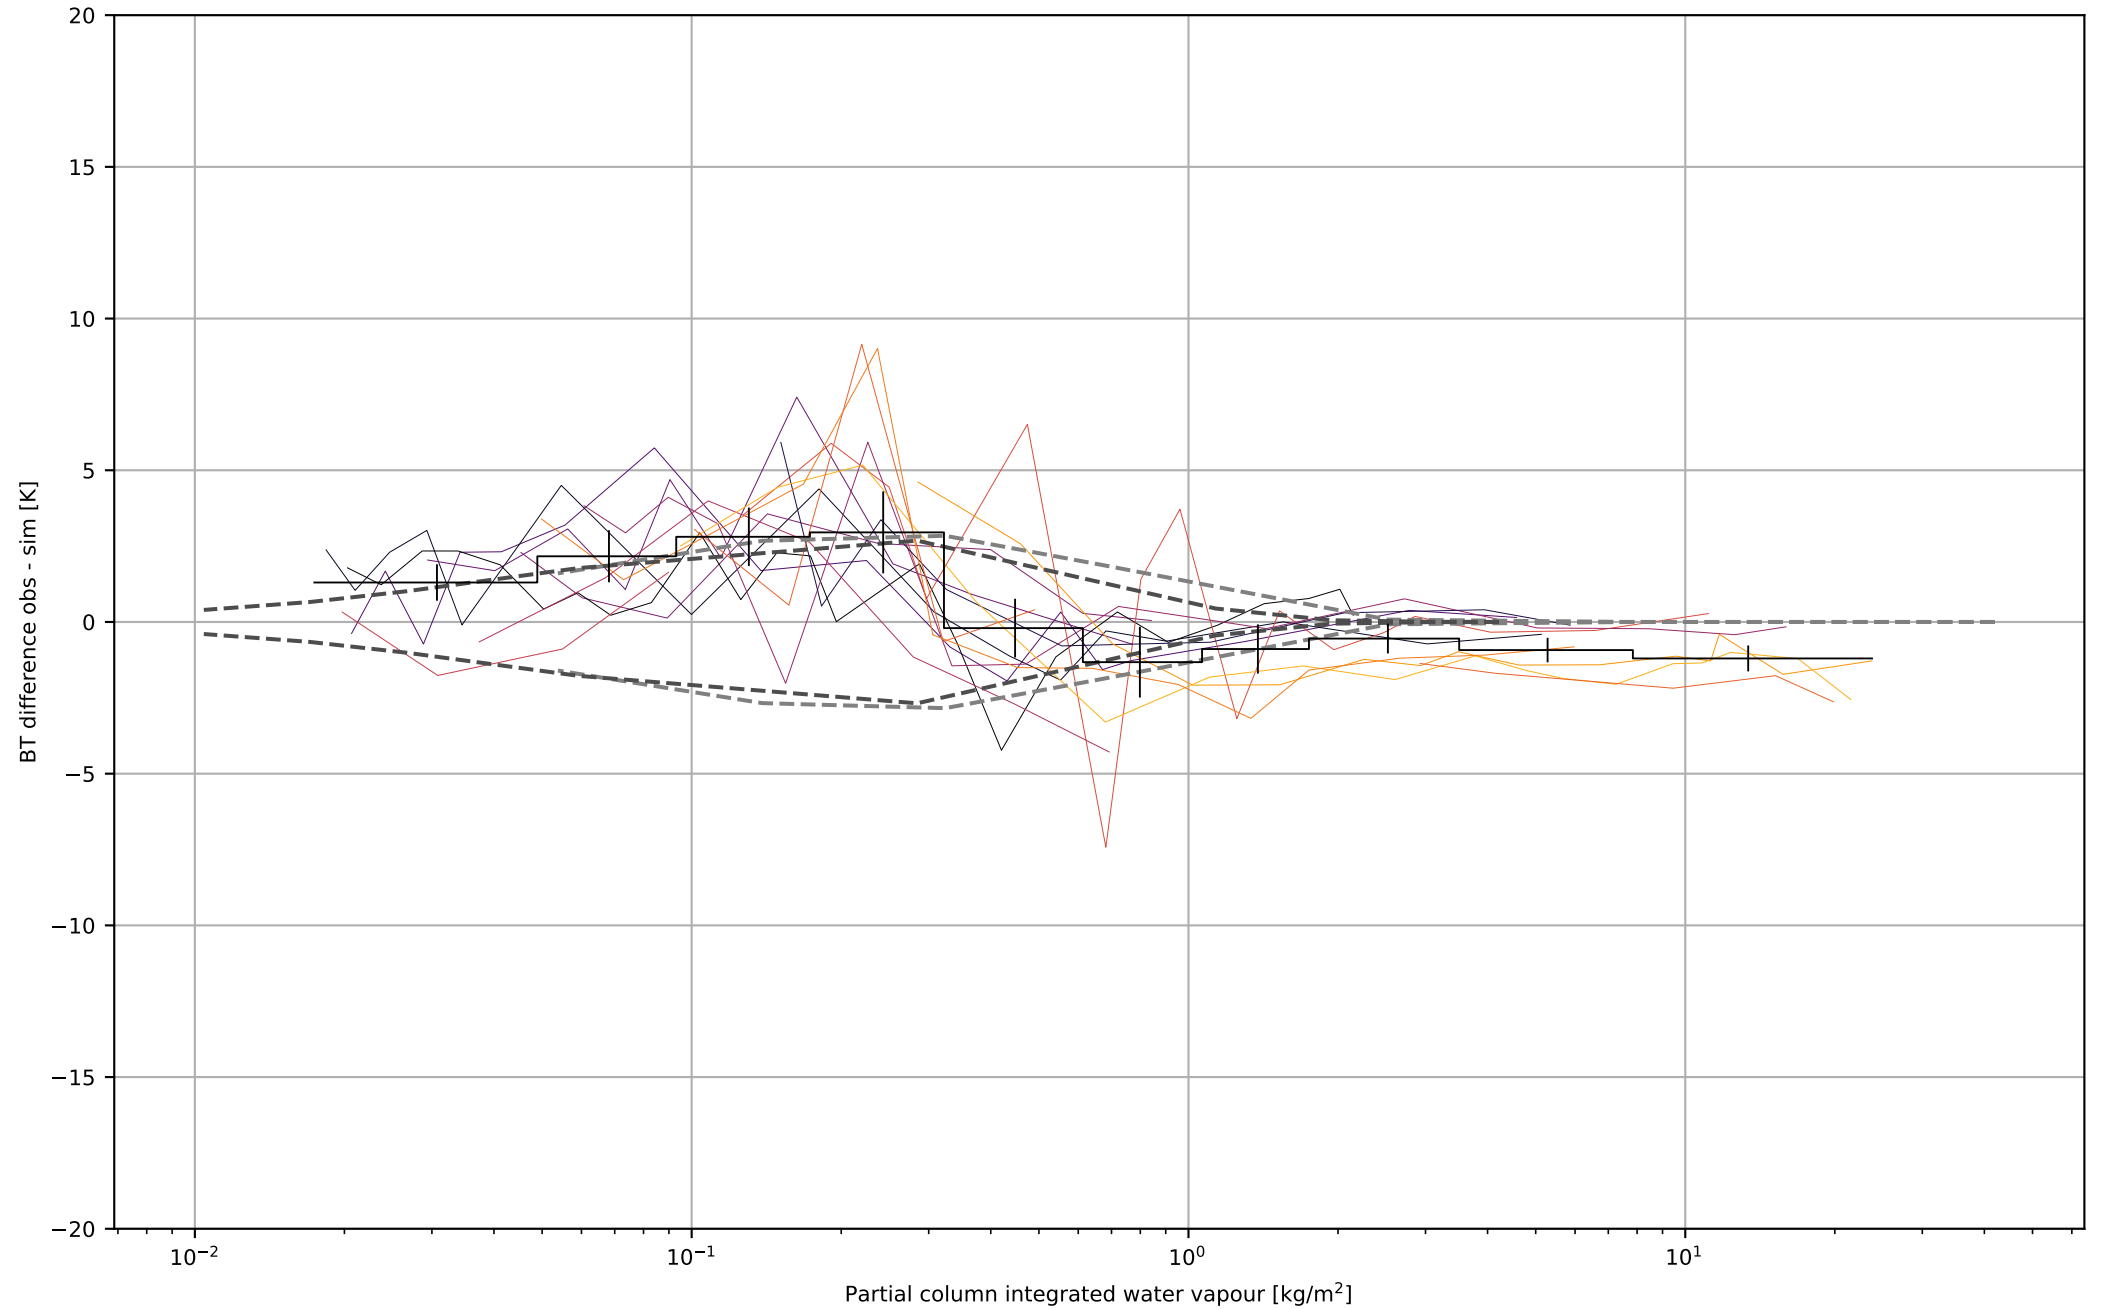





448 $\pm$ 7.2 GHz

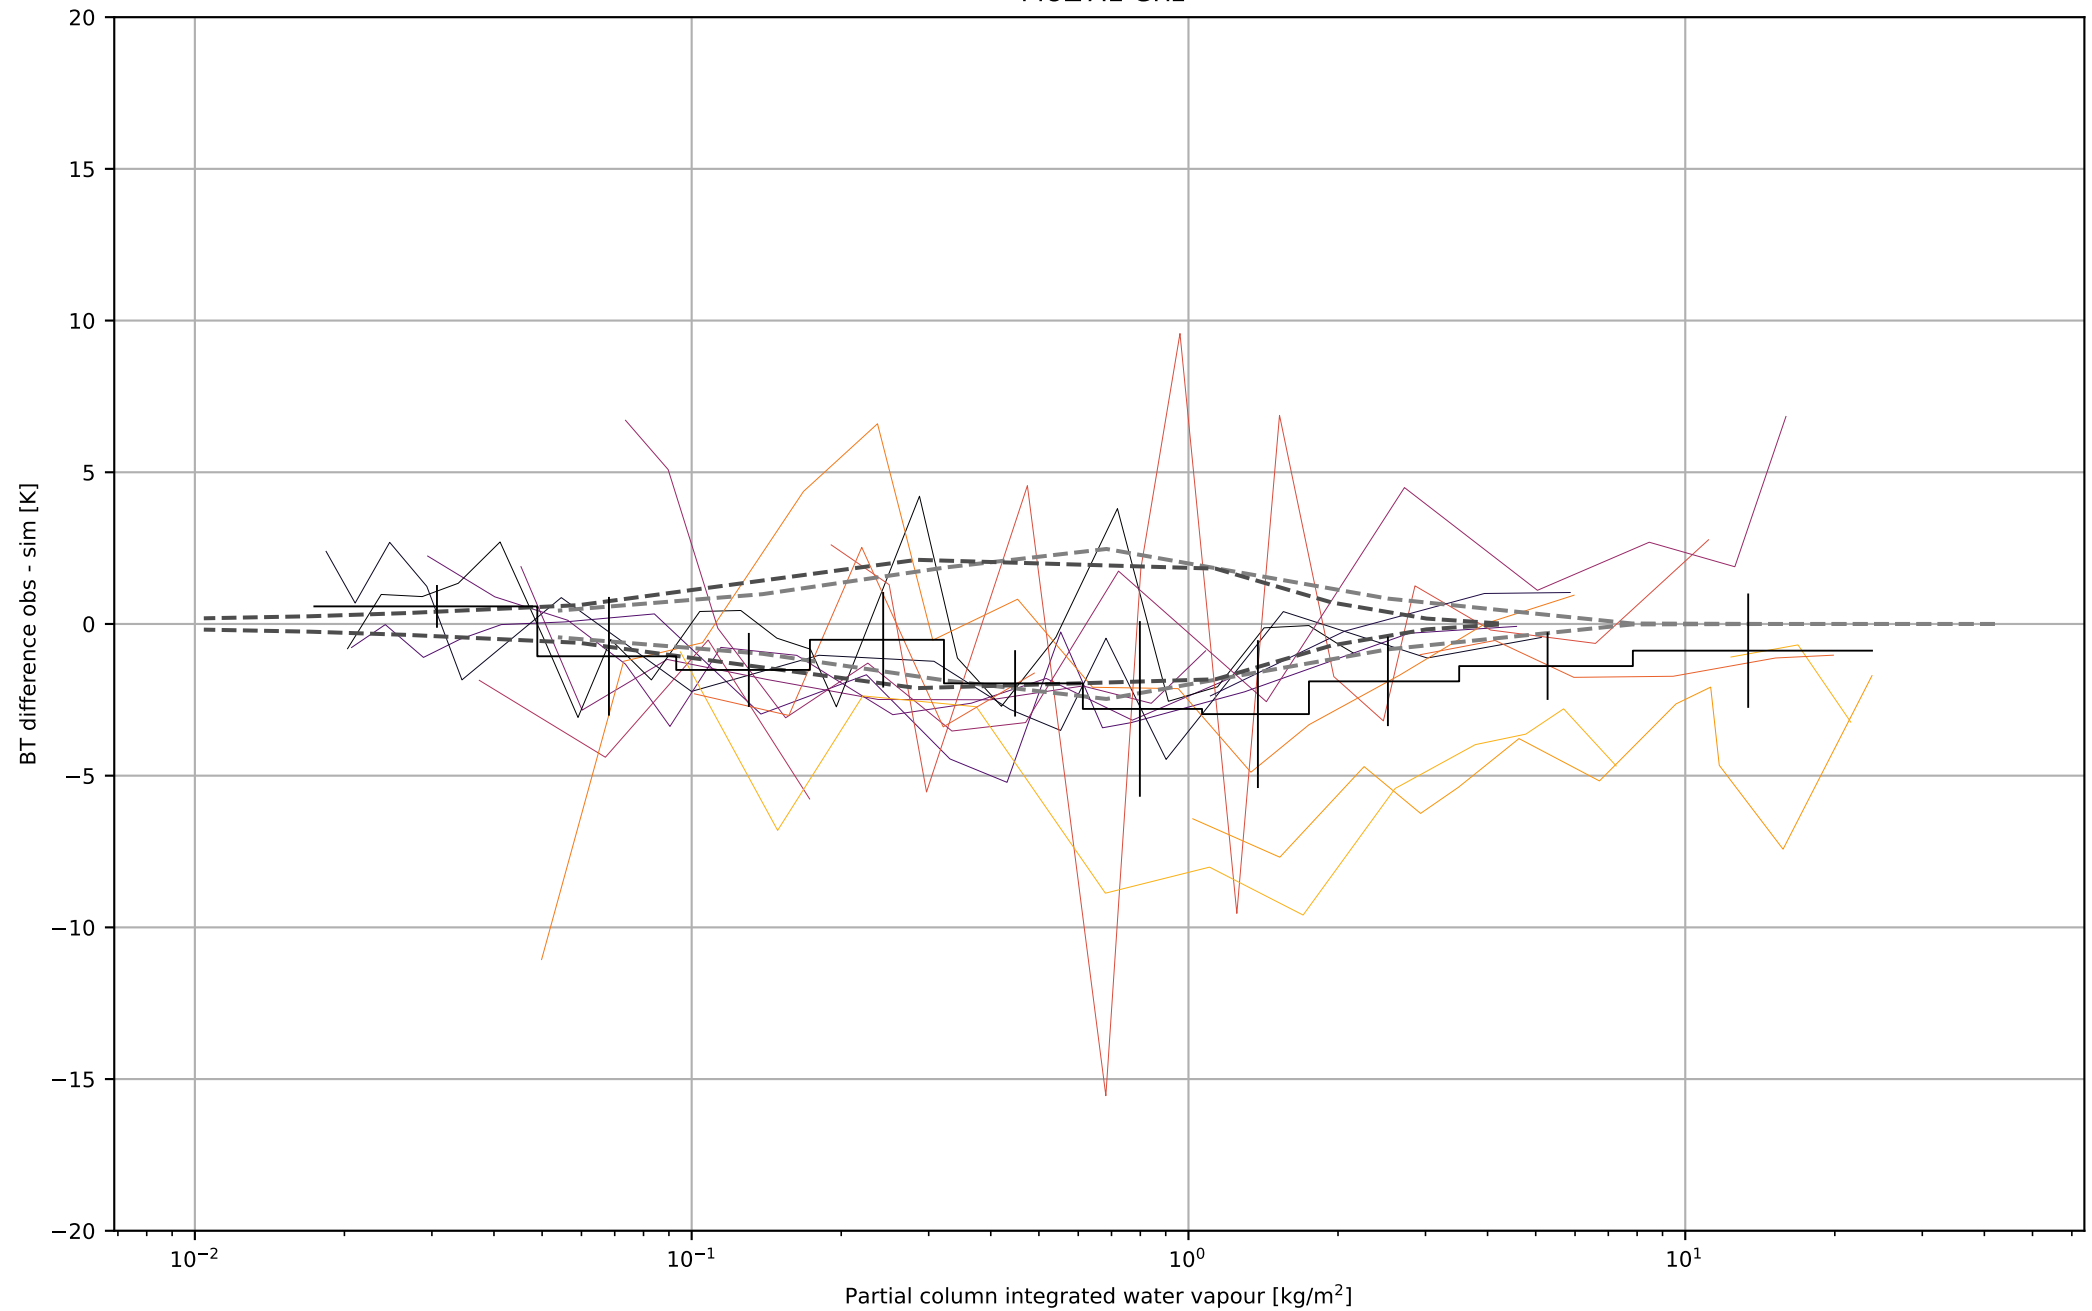





664 GHz

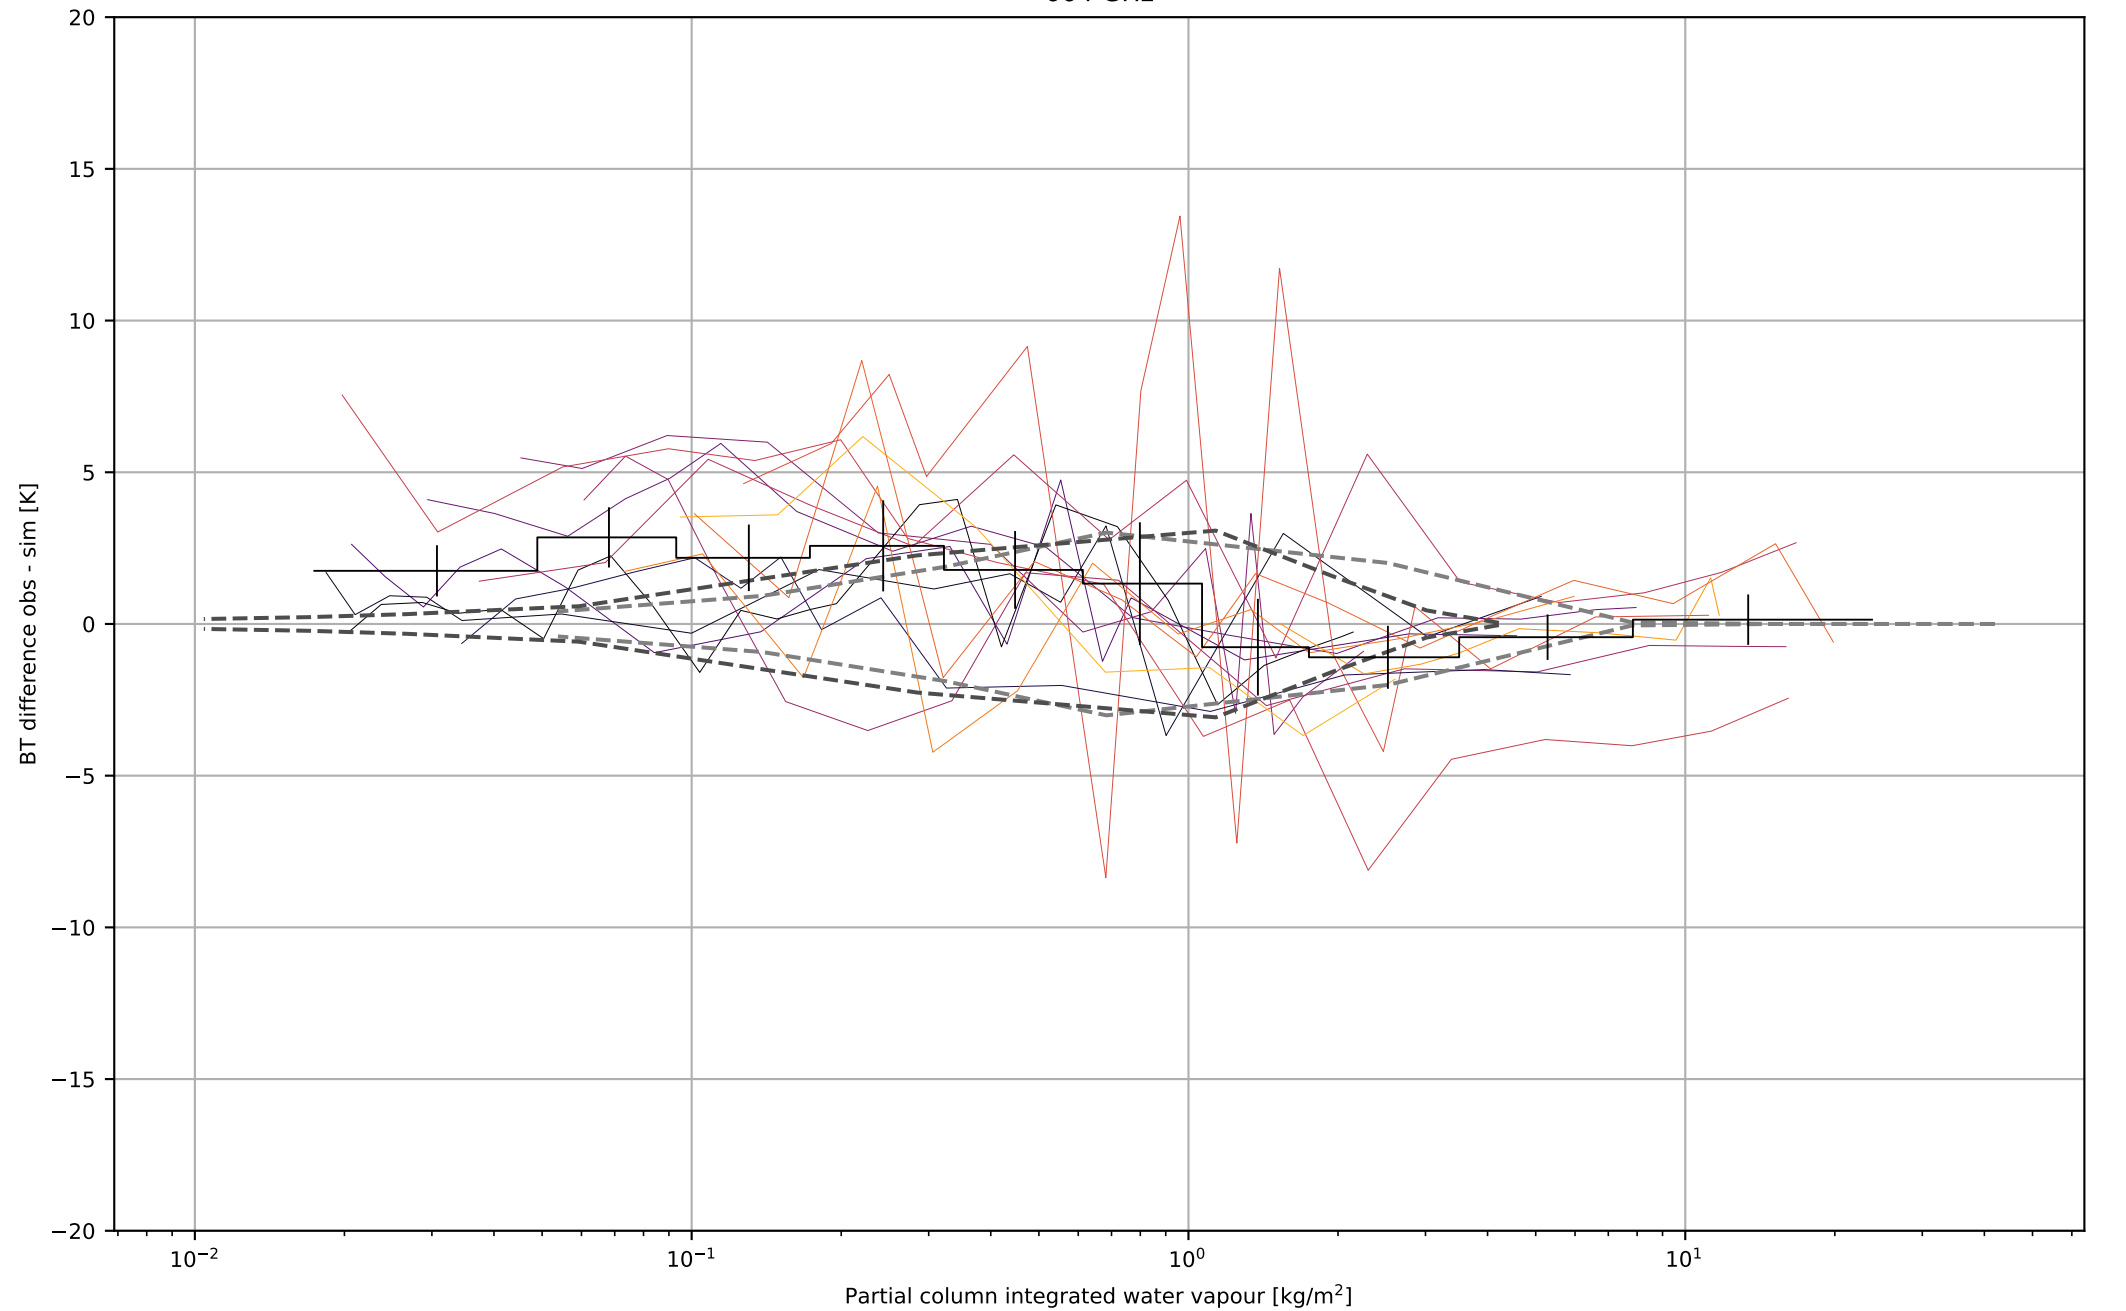

Supplement: Supplementary file 2 [file egusphere-2024-229-supplement.zip]
